# Supplementary material
Source: PubMed Central journal article supplement (PMC2897713)
Supplement: NIHMS212635-supplement-Supplementary_Data.pdf [file NIHMS212635-supplement-Supplementary_Data.pdf]

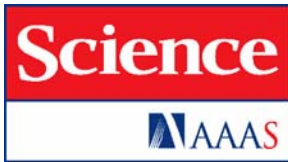

## Supporting Online Material for

### **Coat Variation in the Domestic Dog Is Governed by Variants in Three Genes**

Edouard Cadieu, Mark Neff, Pascale Quignon, Kari Walsh, Kevin Chase,  
Heidi G. Parker, Bridgett M. VonHoldt, Alison Rhue, Adam Boyko, Alexandra Byers,  
Aaron Wong, Dana S. Mosher, Abdel G. Elkahloun, Tyrone C. Spady, Catherine André,  
K. Gordon Lark, Michelle Cargill, Carlos D. Bustamante, Robert K. Wayne,  
Elaine A. Ostrander\*

\*To whom correspondence should be addressed. E-mail: [eostrand@mail.nih.gov](mailto:eostrand@mail.nih.gov)

Published 27 August 2009 on *Science Express*  
DOI: 10.1126/science.1177808

#### **This PDF file includes:**

Materials and Methods  
Figs. S1 to S5  
Tables S1 to S10  
References

## **Materials and Methods:**

### *Sample Collection and DNA Isolation*

DNA was isolated from blood samples collected from AKC registered dogs of established breeds with at least three generations of available pedigree data. Individuals were recruited through AKC-sanctioned dog shows, specialty events, breed clubs, and veterinary clinics. Pedigree analyses were used to ensure that only dogs with no common grandparents were included. The first dataset includes 96 dachshunds representing all three coat varieties; 33 wire-haired, 34 smooth coat, and 29 long-haired dogs. The second dataset includes a set of 76 PWD; 35 with curly hair and 41 with wavy hair. The third dataset consists of 903 dogs from 80 breeds with eight to 12 dogs unrelated at the grandparent level chosen to represent each breed (Table S2). The choice of multiple unrelated dogs maximizes the number of informative meioses scanned for each breed. The final dataset, used only in the furnishings analysis, includes 96 dogs from a single extended family of dachshunds that segregate all three coat types; 25 wire-haired, 66 smooth coated, and 5 long-haired dachshunds.

Samples were collected by licensed veterinarians or trained veterinary technicians through venipuncture of the cephalic vein using standard protocols approved by the NHGRI Animal Care and Use Committee. Collection procedures associated with the dachshund pedigree were approved by U.C. Davis Animal Care and Use Committee. Blood samples for the association studies were collected into ACD or EDTA anticoagulant in test tubes and shipped at room temperature to the Ostrander laboratory at NHGRI. Samples were stored at 4°C prior to DNA extraction. DNA isolation was performed off-site using standard proteinase K/phenol-chloroform isolation methods (HealthGene, Inc., Ontario, Canada). Extracted DNA samples were suspended in 10 mM Tris base, 0.1 mM EDTA, labeled with a coded identifier, and stored at -80°C. For the dachshund family collection was overseen by

U.C. Davis staff. DNA was isolated on site using standard protocols (1) and samples were stored as described above.

### *Genome Wide Association Study*

Samples were genotyped using the Affymetrix Version 2, Canine SNP chip which has approximately 127,000 features. The standard Affymetrix “GeneChip® Mapping 500K Assay” protocol was followed using 250 ng of phenol/chloroform extracted-DNA for each dog ([http://www.affymetrix.com/support/downloads/manuals/500k\\_assay\\_manual.pdf](http://www.affymetrix.com/support/downloads/manuals/500k_assay_manual.pdf)). Before the hybridization step, the volume of the reaction was reduced to 35 µl by heat evaporation to allow the entire reaction to be hybridized to the SNP chip. Chips were run in the NHGRI genotyping core facility. Genotypes were called using the BRLMM-p algorithm ([http://www.affymetrix.com/support/technical/whitepapers/brlmm\\_p\\_whitepaper.pdf](http://www.affymetrix.com/support/technical/whitepapers/brlmm_p_whitepaper.pdf)) on batched sets of CEL files (2). All calls were combined into one dataset and analyzed using PLINK (3). SNPs with a call rate of <90%, that were heterozygous in >60% of individuals, or had discordant genotype calls in >1/3 of 158 duplicate pairs were discarded. Of the remaining SNPs, 43 had minor allele frequencies of <1%. The resulting sets of informative SNPs were as follows; 51,071 in the dachshund dataset and 40,812 in the CanMap dataset were used in the association analyses described in this study. The SNP chips for the PWD dataset were run at the University of Utah core facility and a similar process was used to define the 56,395 informative SNPs. A complete list of SNPs is available at [http://research.nhgri.nih.gov/dog\\_genome/](http://research.nhgri.nih.gov/dog_genome/).

### *Dachshund Pedigree Microsatellite Genotyping*

A pedigree of 96 dachshunds was genotyped using a set of 167 well distributed canine-specific microsatellite markers and standard conditions (4, 5). Genotypes were analyzed using MENDEL (6). The fine mapping for the family utilized 28 additional microsatellites,

genotyped on 37 dachshunds, of which nine carried the wire hair/furnishings phenotype and 28 were smooth coated.

### *Case/Control Data Analysis*

The multibreed dataset was divided into cases and controls based on the presence or absence of the phenotype in question according to the AKC breed standard descriptions (7). Phenotypes for each breed are listed in Table S2. For the first phenotype, furnishings, we used 225 dogs from 19 breeds with furnishings as cases and 650 dogs from 58 breeds without furnishings as controls. For the second phenotype, hair length, we used 319 dogs from 31 breeds with long hair as cases and 364 dogs from 34 breeds with short hair as controls. For the last phenotype, curl, we used 61 curly-haired dogs from five breeds as cases and 429 non-curly haired dogs from 37 breeds as controls. Individuals from the single breed datasets (dachshund and Portuguese water dog) were phenotyped based on owner descriptions or variety classifications. Single marker  $\chi^2$  association, model-based Fisher association, and haplotype association was performed on all datasets using the PLINK analysis program (3).

### *Fine Mapping in the Case Control Datasets*

Additional SNPs were chosen from public databases utilizing the canine genome sequence (8) (<http://www.broad.mit.edu/node/459>, <http://www.ncbi.nlm.nih.gov/projects/SNP/>). Assays were designed for SNPs from the region around the peak of strongest association at each locus.

For the furnishings locus on CFA13, the best associated-haplotype ( $P$ -value= $4 \times 10^{-292}$ ) derived from the GWAS studies included seven SNPs at positions spanning 11,593,074-11,718,754. We genotyped 88 SNPs from positions 10,184,498 -12,586,193 on 177 cases (30 breeds) and 176 controls (21 breeds) (Figure S1, Table S3).

For the hair length locus on CFA32, 41 SNPs spanning 1.3 Mb from position 6,793,199 – 8,133,439 were genotyped on 293 cases (39 breeds) and 197 controls (32 breeds) (Figure S3 and Table S6).

For the curl locus on CFA27, 59 SNPs spanning the peak and covering a Keratin genes cluster (20 genes) from positions 4,967,176 -5,969,708 were genotyped on 91 cases (10 breeds) and 577 controls (97 breeds) (Figure S4 and Table S8). SNPs were genotyped using the SNPlex™ genotyping system and an ABI 3730XL genome analyzer with standard protocols (Applied Biosystems, Santa Clara, CA).

### *Sequencing*

Primers to surround all conserved segments within the associated haplotypes and to tile across regions of particular interest were designed using the Primer3 program (9). Segments were amplified using standard PCR protocols and a 40 cycle, touch-down thermocycler program with the annealing temperature reduced by ½ a degree for the first 20 cycles, then held steady at the lowest temperature for the last 20 cycles.

For regions with high GC content we used a slightly modified protocol. We added GC-melt reagent (Clontech, Mountain View, CA) at 0.5 – 1M concentration, increased the  $T_M$  of the primers to between 67 to 72 °C and ran the following two temperature thermocycler program: 35 cycles of (95 °C 30 sec and 68 °C 2 min/kb) followed by a 10 min final extension at 72°C. Primer sequences can be found in Table S4.

Each segment was sequenced using BigDye terminator sequencing kits and standard protocols (Applied Biosystems, Santa Clara, CA).

### *Genotyping the Causal Mutations*

An additional and unique set of samples consisting of at least 661 dogs from 108 breeds representing multiple coat phenotypes was used to confirm each mutation. The number of cases and controls for each of the three phenotypes (furnishings, length of hair, and curl) are respectively: Furnishings - 298 cases and 406 controls (including 11 wild canids); Long hair - 292 cases, 204 controls (including 9 wild canids) and 27 samples from breeds that segregate long and short hair; Curl - 36 cases, 538 controls (including 9 wild canids) and 87 dogs from breeds that segregate curly and non-curly coats. (Table S1).

To genotype the insertion in *RSPO2*, the size of each segment was checked on agarose gels to determine the presence or absence. (Figure S5). For the two point mutations in *FGF5* and *KRT71*, PCR and sequencing was performed as described in the fine mapping section with sequences called and aligned using the Phred/Phrap/Consed package (10, 11) and SNPs genotyped using Polyphred (12). A complete list of primers can be found in Table S4.

### *Expression Analysis*

Skin samples were isolated by a punch biopsy of 4mm from the muzzles of thirteen dogs, including 7 with furnishings and 6 without. Total RNA was isolated primarily from the epidermal and dermal layer of the skin using standard protocols (13). Transcript levels were estimated by quantitative PCR with the Power SYBR Green PCR master mix (Applied Biosystems) and manufacturers suggested protocols. Quantities were normalized to the reference gene *NFUI* (previously called *HIRP5*) (accession number XM\_850340) (14, 15). To ensure that the biopsies contain hair in the same cycle, we evaluated the expression of *FGF5*. Indeed, *FGF5* has highly variable expression over the course of the hair cycle and differs by approximately 4000 copies /ng with an expression peak during the anagen phase

(13). In our experiment there was no significant difference in the *FGF5* expression between the samples from dogs with and without furnishings.

Figure S1: Haplotype drawing from Snplex data in the furnishings locus on CFA13. The orange color represents the major homozygous genotype in the cases, the green color represent the minor homozygous genotype in the cases, white color represent the heterozygous genotype, and black color is no data.

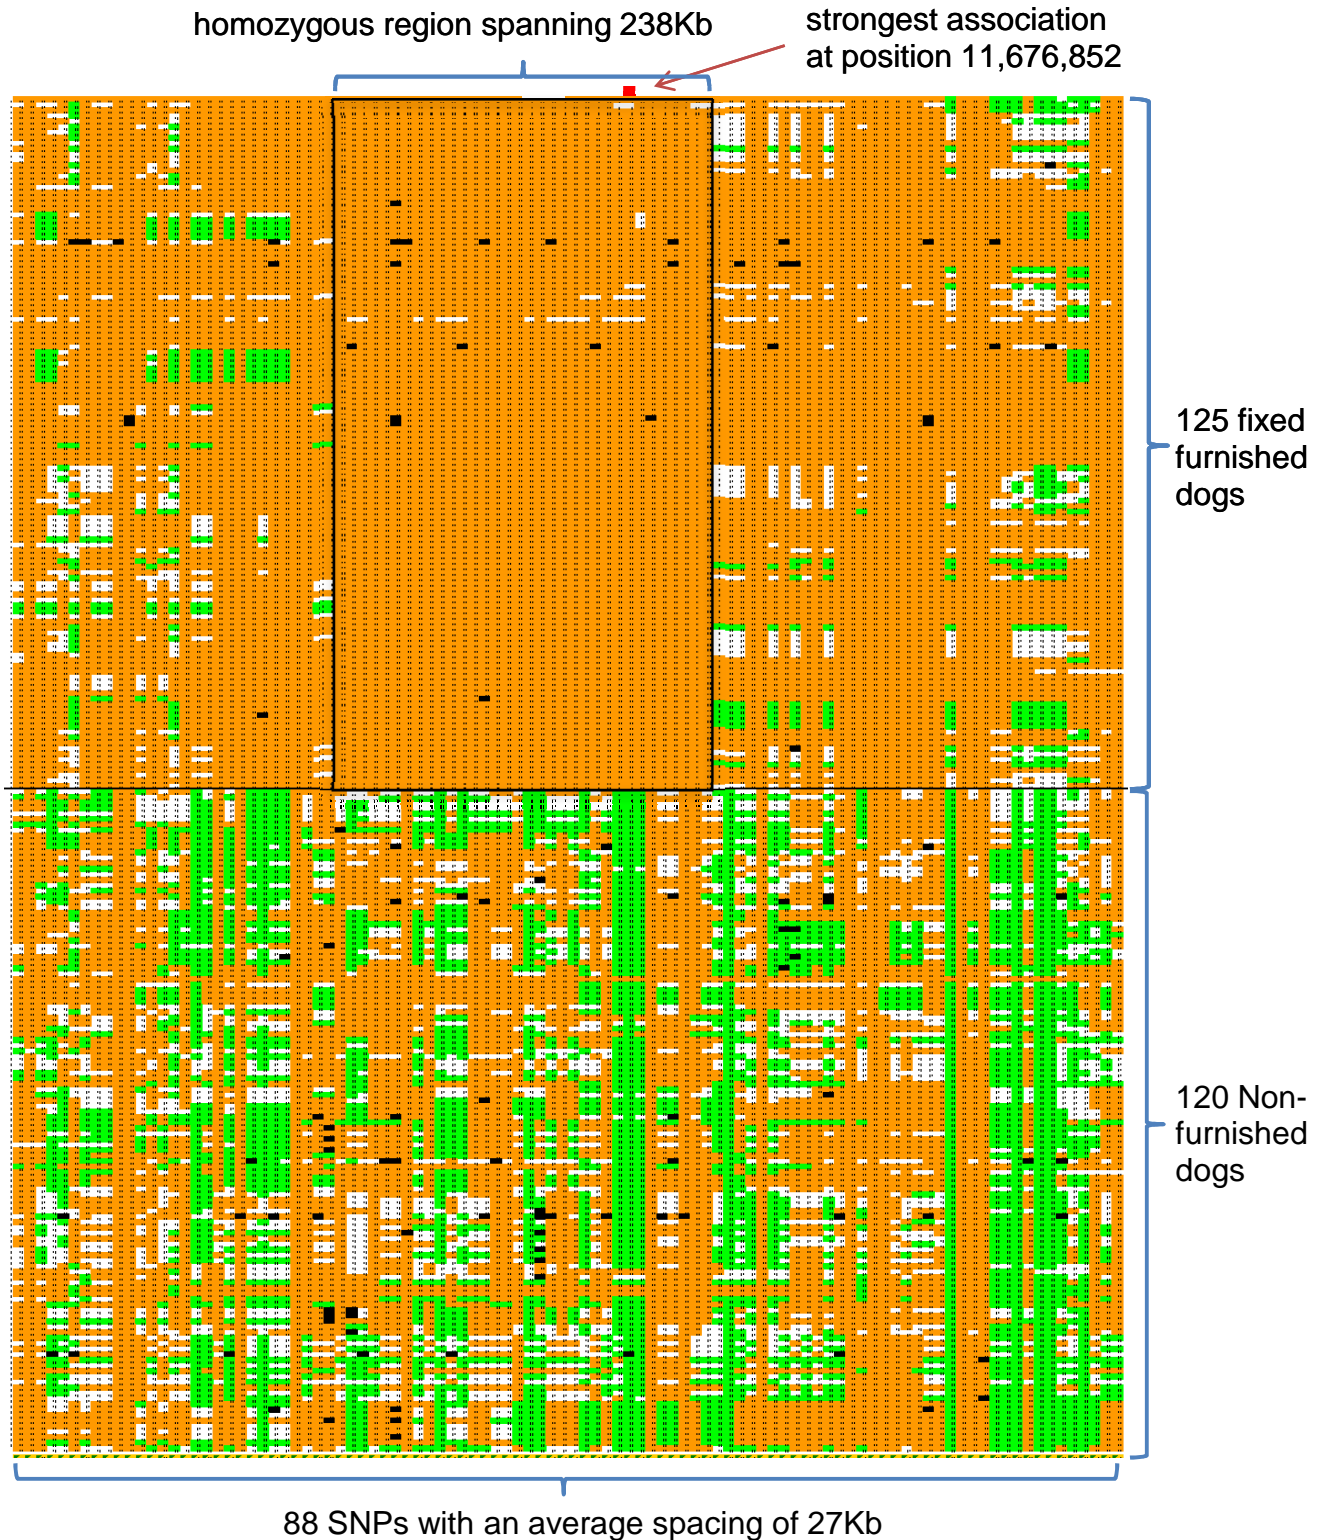



Figure S2. Quantitative analysis of expression of the *RSPO2* gene in dogs with and without furnishings. qPCR was performed on 7 dogs with furnishings and 6 dogs without. Transcript amounts were normalized to a reference gene and averaged across all individuals in each group.

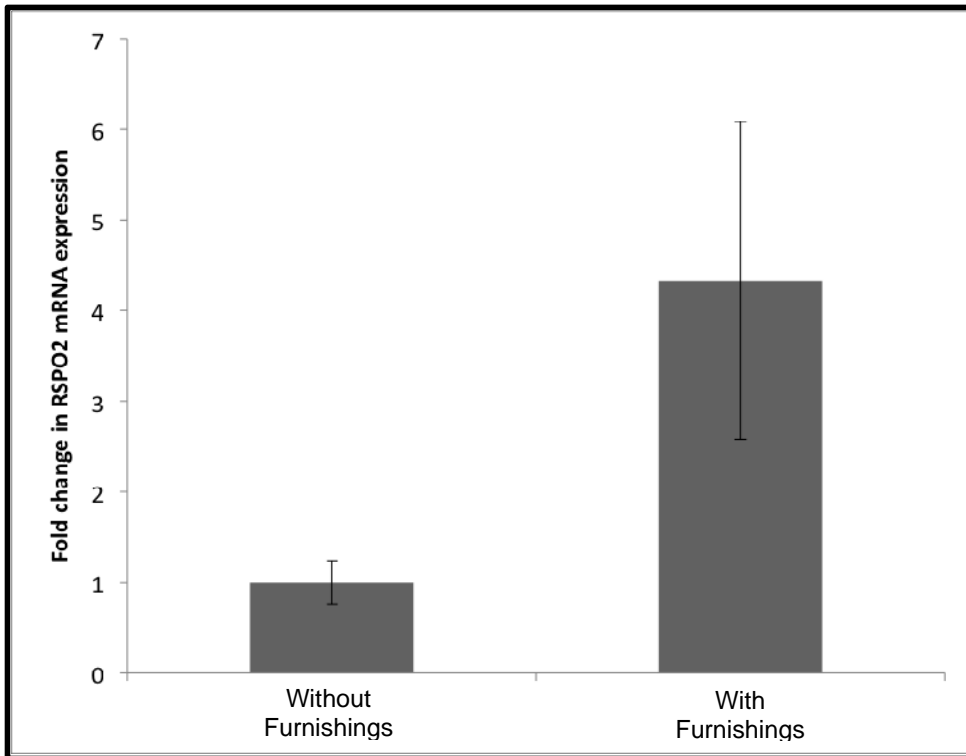

Figure S3: Haplotype drawing from Snplex data in the fur length locus on CFA32. The orange color represents the homozygous major allele in the cases, the green color represent the homozygous minor allele in the cases, white color represent the heterozygous genotype, and black color is no data.

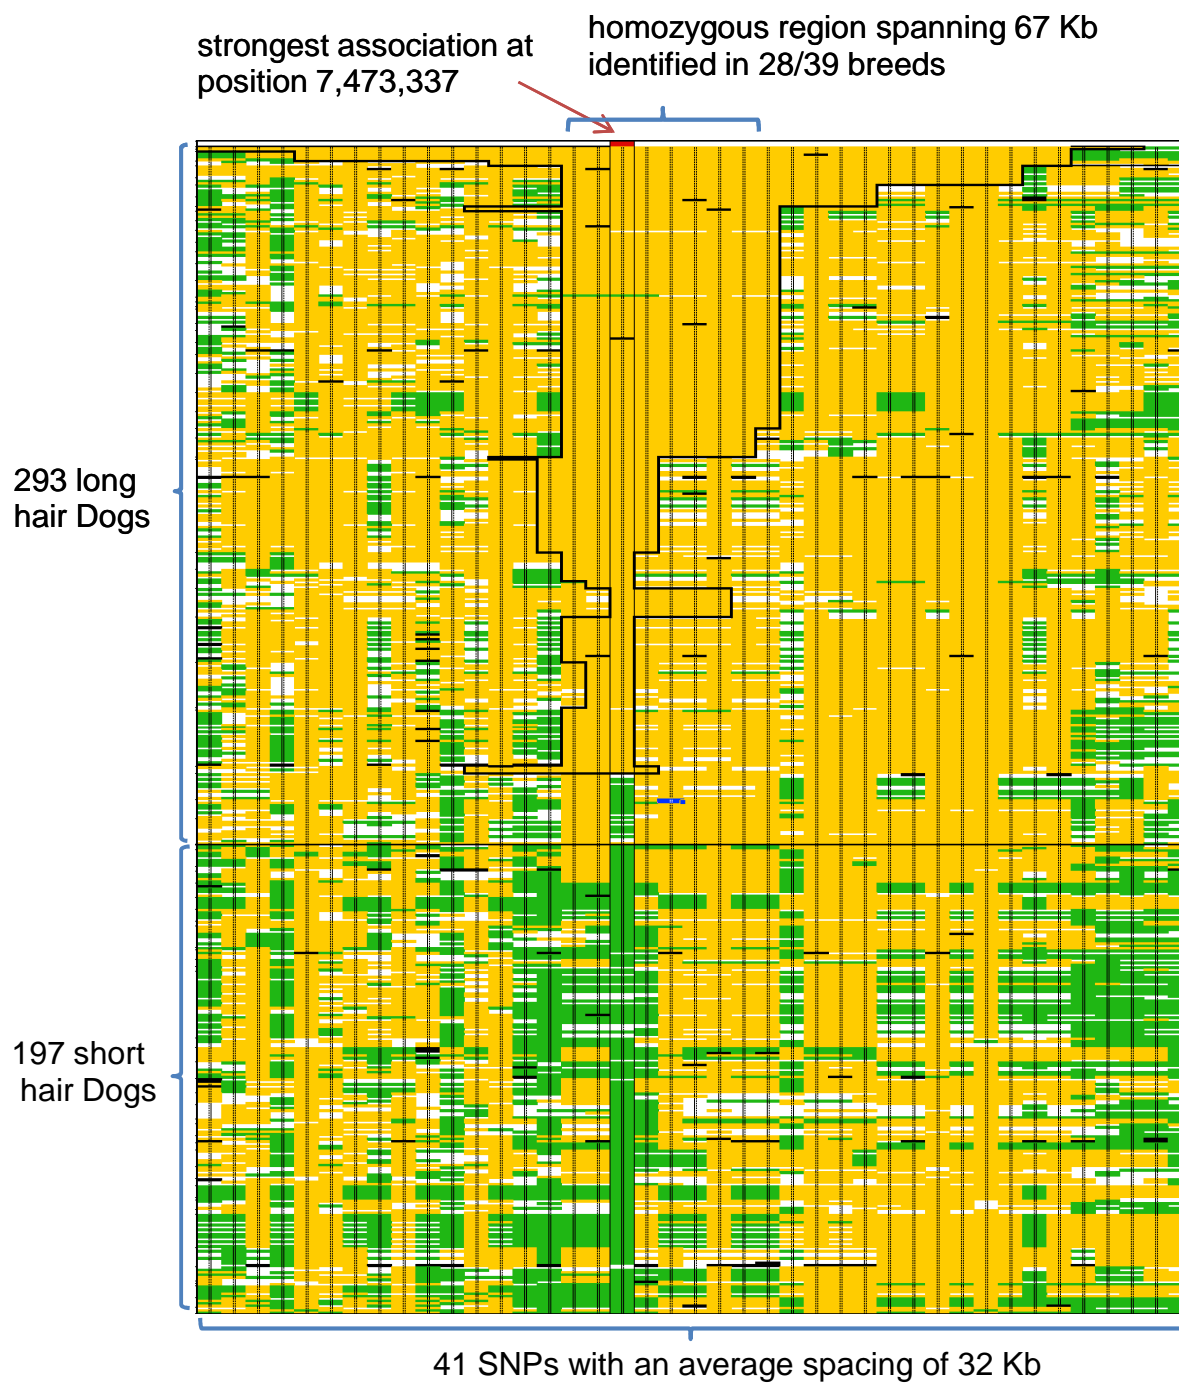

Figure S4. Genotypes of 59 SNPs in the curly locus on CFA27 in 122 dogs. The orange color represents the homozygous major allele in the cases, the green color represent the homozygous minor allele in the cases, white color represent the heterozygous genotype, and black color is no data. The SNP that shows the highest association is highlighted with a red box and arrow.

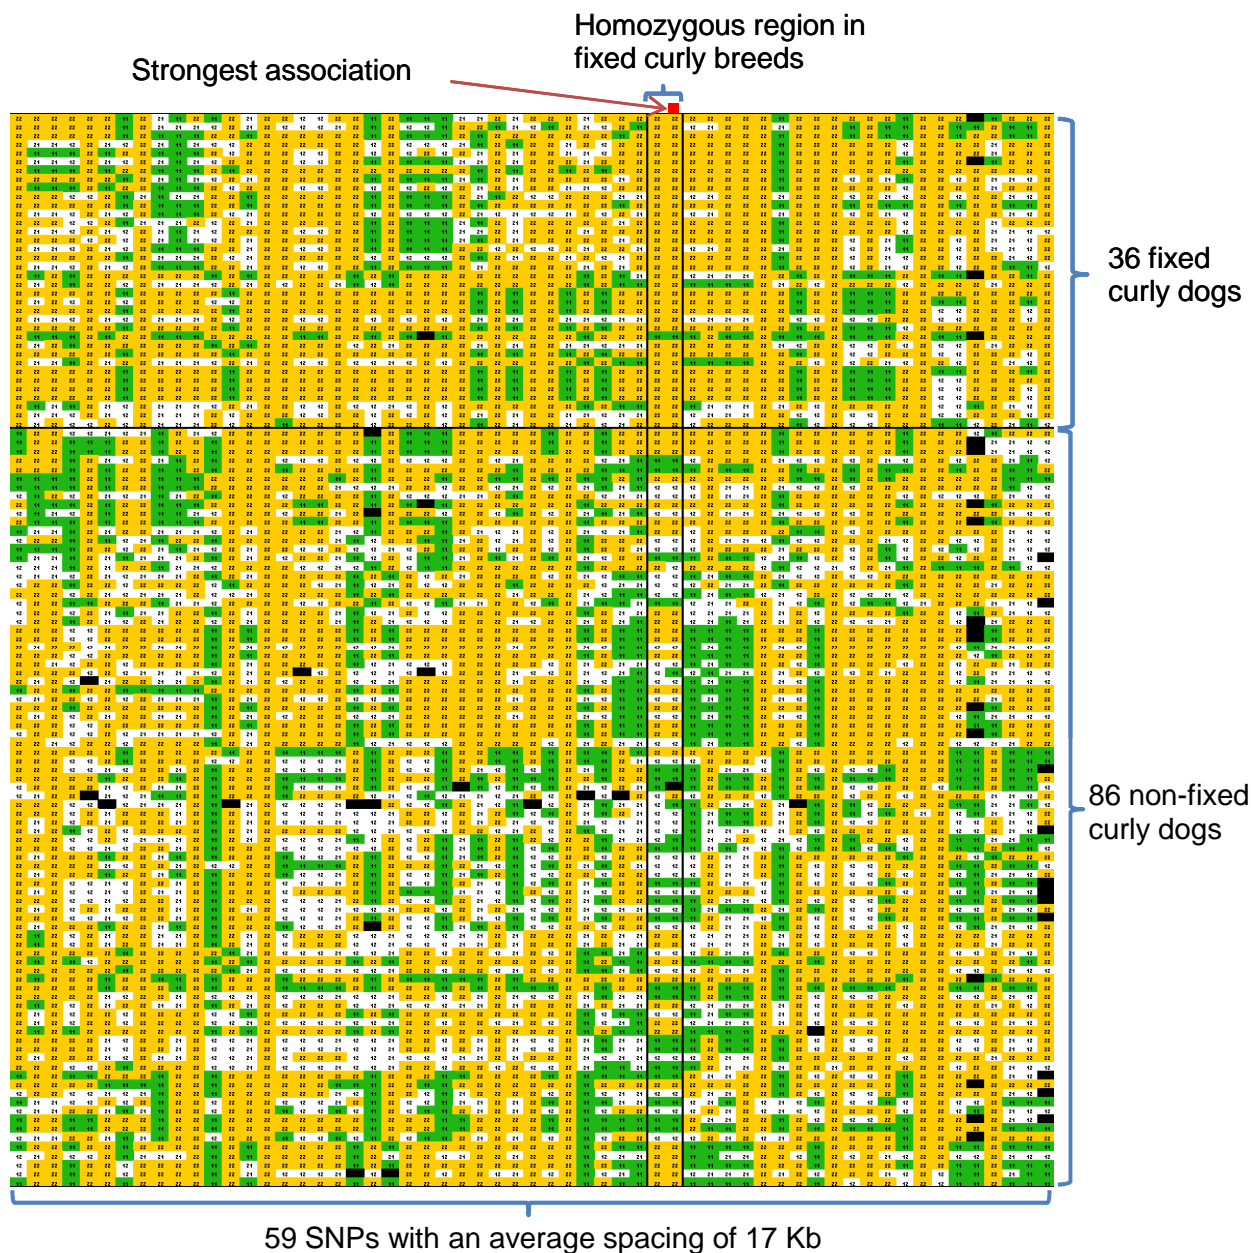

Figure S5: For the mutation in *RSPO2*, the size of each segment was checked on agarose gels to determine the presence or absence of the insertion (167 bp). We performed a PCR with primer SQ7058 (Table S4) on 704 samples (dogs + wild canids). Here, it's an example of gel. M correspond to the 1 Kb Plus DNA Ladder. Without exception, All PCR with insertion (817 bp) correspond to dogs with furnishings such as Scottish Terrier(1), Wire-haired Dachshund(2). All PCR without insertion (676 bp) correspond to dogs without furnishings such as Cavalier King Charles Spaniel(3), Long-Haired Dachshund(8). PCR with both variants correspond to dogs where can segregate the furnishings phenotype such as German Wirehaired Pointer(4) and Wire-haired Dachshund(18).

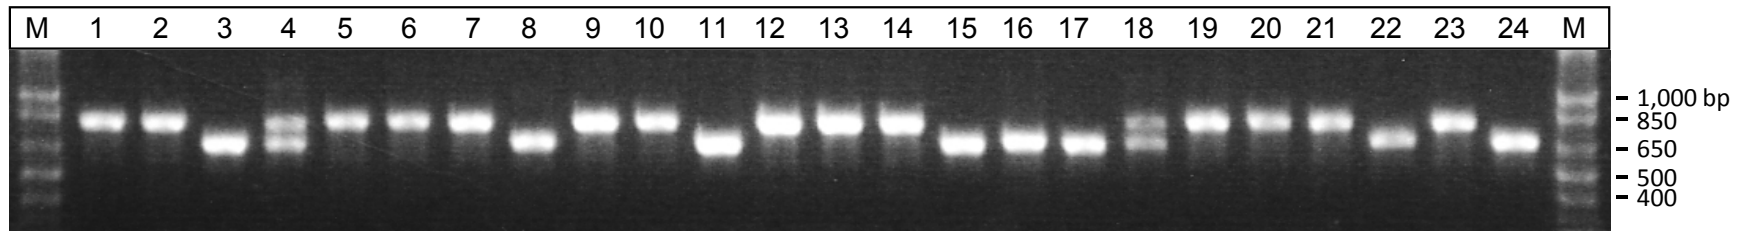

Lane 1) Scottish Terrier  
 Lane 2) Wire-haired Dachshund  
 Lane 3) Cavalier King Charles Spaniel  
 Lane 4) German Wirehaired Pointer  
 Lane 5) Kerry Blue Terrier  
 Lane 6) Yorkshire Terrier  
 Lane 7) Wire Fox Terrier  
 Lane 8) Long-haired Dachshund  
 Lane 9) Wire-haired Dachshund  
 Lane 10) Soft Coated Wheaten Terrier  
 Lane 11) Short-haired Dachshund  
 Lane 12) Airedale Terrier

Lane 13) Wire-haired Dachshund  
 Lane 14) Glen of Imaal Terrier  
 Lane 15) Cocker Spaniel  
 Lane 16) Saluki  
 Lane 17) Basenji  
 Lane 18) Wire-haired Dachshund  
 Lane 19) Portuguese Water Dog  
 Lane 20) Wire-haired Dachshund  
 Lane 21) Glen of Imaal Terrier  
 Lane 22) Saluki  
 Lane 23) Scottish Terrier  
 Lane 24) Long-haired Dachshund

Table S1. Genotypes of 707 dogs at all three coat controlling mutations. Combinations of the three genotypes can explain seven different coat phenotypes. The mutation is highlighted in yellow, the wild-type allele is in blue, and heterozygous genotypes are green.

| BREED*                  | length <sup>a</sup> | furnishings | curl | <i>FGF5</i> Genotype <sup>b</sup> | <i>RSPO2</i> Genotype <sup>c</sup> | <i>KRT71</i> Genotype <sup>d</sup> |
|-------------------------|---------------------|-------------|------|-----------------------------------|------------------------------------|------------------------------------|
| Afghan Hound            | Long                | no          | no   | GG                                | 11                                 | CC                                 |
| Afghan Hound            | Long                | no          | no   | GG                                | 11                                 | CC                                 |
| Afghan Hound            | Long                | no          | no   | GG                                | 11                                 | CC                                 |
| Afghan Hound            | Long                | no          | no   | GG                                | 11                                 | CC                                 |
| Afghan Hound            | Long                | no          | no   | GG                                | 11                                 | CC                                 |
| Afghan Hound            | Long                | no          | no   | GG                                | 11                                 | CC                                 |
| Afghan Hound            | Long                | no          | no   | GG                                | 11                                 | CC                                 |
| Afghan Hound            | Long                | no          | no   | GG                                | 11                                 | CC                                 |
| Afghan Hound            | Long                | no          | no   | GT                                | 11                                 | CC                                 |
| Afghan Hound            | Long                | no          | no   | GT                                | 11                                 | CC                                 |
| Afghan Hound            | Long                | no          | no   | GT                                | 11                                 | CC                                 |
| Afghan Hound            | Long                | no          | no   |                                   | 11                                 | CC                                 |
| Airedale Terrier*       | Medium              | yes         | both | GG                                | 22                                 | TT                                 |
| Airedale Terrier        | Medium              | yes         | both | GT                                | 22                                 | TT                                 |
| Airedale Terrier        | Medium              | yes         | both | TT                                | 22                                 | TT                                 |
| Akita                   | Short               | no          | no   | GG                                | 11                                 | CC                                 |
| Akita                   | Short               | no          | no   | GG                                | 11                                 | CC                                 |
| Alaskan Malamute        | Medium              | no          | no   | GG                                | 11                                 | CC                                 |
| Alaskan Malamute        | Medium              | no          | no   | GG                                | 11                                 | CC                                 |
| Alaskan Malamute        | Medium              | no          | no   | GT                                | 11                                 | CC                                 |
| American Eskimo Dog     | Long                | no          | no   | TT                                | 11                                 | CC                                 |
| American Eskimo Dog     | Long                | no          | no   | TT                                | 11                                 | CC                                 |
| American Eskimo Dog     | Long                | no          | no   | TT                                | 11                                 | CC                                 |
| American Eskimo Dog     | Long                | no          | no   | TT                                | 11                                 | CC                                 |
| American Water Spaniel* | Medium              | no          | both | TT                                | 11                                 | CC                                 |
| American Water Spaniel  | Medium              | no          | both | TT                                | 11                                 |                                    |
| Anatolian Shepherd*     | Varies              | no          | no   | GG                                | 11                                 | CC                                 |
| Australian Shepherd     | Long                | no          | no   | GT                                | 11                                 | CC                                 |
| Australian Shepherd     | Long                | no          | no   | TT                                | 11                                 | CC                                 |
| Australian Shepherd     | Long                | no          | no   | TT                                | 11                                 | CC                                 |
| Australian Shepherd     | Long                | no          | no   | TT                                | 11                                 | CC                                 |
| Australian Shepherd     | Long                | no          | no   | TT                                | 11                                 | CC                                 |
| Australian Terrier      | Medium              | yes         | no   | GG                                | 22                                 | CC                                 |
| Australian Terrier      | Medium              | yes         | no   | GG                                | 22                                 | CC                                 |
| Australian Terrier      | Medium              | yes         | no   | GG                                | 22                                 | CC                                 |
| Australian Terrier      | Medium              | yes         | no   | GG                                | 22                                 | CC                                 |
| Australian Terrier      | Medium              | yes         | no   | GG                                | 22                                 | CC                                 |
| Australian Terrier      | Medium              | yes         | no   | GG                                | 22                                 |                                    |
| Basenji                 | Short               | no          | no   |                                   | 11                                 | CC                                 |
| Basenji                 | Short               | no          | no   | GG                                | 11                                 | CC                                 |
| Basenji                 | Short               | no          | no   | GG                                | 11                                 | CC                                 |
| Basenji                 | Short               | no          | no   | GG                                | 11                                 | CC                                 |
| Basenji                 | Short               | no          | no   | GG                                | 11                                 | CC                                 |
| Basenji                 | Short               | no          | no   | GG                                | 11                                 | CC                                 |
| Basenji                 | Short               | no          | no   | GG                                | 11                                 | CC                                 |
| Basenji                 | Short               | no          | no   | GG                                | 11                                 | CC                                 |
| Basenji                 | Short               | no          | no   | GG                                | 11                                 | CC                                 |
| Basenji                 | Short               | no          | no   | GG                                | 11                                 | CC                                 |
| Basset Hound            | Short               | no          | no   | GG                                | 11                                 | CC                                 |
| Basset Hound            | Short               | no          | no   | GG                                | 11                                 | CC                                 |

|                       |        |     |      |    |    |    |
|-----------------------|--------|-----|------|----|----|----|
| Basset Hound          | Short  | no  | no   | GG | 11 | CC |
| Basset Hound          | Short  | no  | no   | GG | 11 | CC |
| Basset Hound          | Short  | no  | no   | GG | 11 | CC |
| Basset Hound          | Short  | no  | no   | GG | 11 | CC |
| Beagle                | Short  | no  | no   | GG | 11 | CC |
| Beagle                | Short  | no  | no   | GG | 11 | CC |
| Bearded Collie        | Long   | yes | no   |    | 22 | CC |
| Bearded Collie        | Long   | yes | no   |    | 22 | CC |
| Bearded Collie        | Long   | yes | no   | TT | 22 | CC |
| Belgian Tervuren      | Long   | no  | no   | TT | 11 | CC |
| Belgian Tervuren      | Long   | no  | no   | TT | 11 | CC |
| Bernese Mountain Dog  | Long   | no  | no   |    | 11 |    |
| Bernese Mountain Dog  | Long   | no  | no   | TT | 11 | CC |
| Bernese Mountain Dog  | Long   | no  | no   | TT | 11 | CC |
| Bernese Mountain Dog  | Long   | no  | no   | TT | 11 | CC |
| Bernese Mountain Dog  | Long   | no  | no   | TT | 11 | CC |
| Bichon Frise*         | Long   | yes | both | TT | 22 | CT |
| Bichon Frise          | Long   | yes | both | TT | 22 | CT |
| Bichon Frise          | Long   | yes | both | TT | 22 | TT |
| Bichon Frise          | Long   | yes | both | TT | 22 | TT |
| Bichon Frise          | Long   | yes | both | TT | 22 | TT |
| Bichon Frise          | Long   | yes | both | TT | 22 | TT |
| Black Russian Terrier | Medium | yes | no   | TT | 22 | CC |
| Black Russian Terrier | Medium | yes | no   | TT | 22 | CC |
| Black Russian Terrier | Medium | yes | no   | TT | 22 | CC |
| Black Russian Terrier | Medium | yes | no   | TT | 22 | CC |
| Black Russian Terrier | Medium | yes | no   | TT | 22 | CC |
| Black Russian Terrier | Medium | yes | no   | TT | 22 | CC |
| Bloodhound            | Short  | no  | no   | GG | 11 | CC |
| Bloodhound            | Short  | no  | no   | GG | 11 | CC |
| Bloodhound            | Short  | no  | no   | GG | 11 | CC |
| Bloodhound            | Short  | no  | no   | GG | 11 | CC |
| Bloodhound            | Short  | no  | no   | GG | 11 | CC |
| Border Collie*        | Varies | no  | no   | GT | 11 | CT |
| Border Collie         | Varies | no  | no   | TT | 11 | CC |
| Border Collie         | Varies | no  | no   | TT | 11 | CC |
| Border Collie         | Varies | no  | no   | TT | 11 | CC |
| Border Collie         | Varies | no  | no   | TT | 11 | CC |
| Border Terrier        | Short  | yes | no   | GG | 22 | CC |
| Border Terrier        | Short  | yes | no   | GG | 22 | CC |
| Border Terrier        | Short  | yes | no   | GG | 22 | CC |
| Border Terrier        | Short  | yes | no   | GG | 22 | CC |
| Border Terrier        | Short  | yes | no   | GG | 22 | CC |
| Borzoï                | Long   | no  | no   | TT | 11 | CC |
| Borzoï                | Long   | no  | no   | TT | 11 | CC |
| Borzoï                | Long   | no  | no   | TT | 11 | CC |
| Borzoï                | Long   | no  | no   | TT | 11 | CC |
| Borzoï                | Long   | no  | no   | TT | 11 | CC |
| Borzoï                | Long   | no  | no   | TT | 11 | CC |
| Borzoï                | Long   | no  | no   | TT | 11 | CC |
| Boston Terrier        | Short  | no  | no   | GG | 11 | CC |
| Boston Terrier        | Short  | no  | no   | GG | 11 | CC |
| Boston Terrier        | Short  | no  | no   | GG | 11 | CC |
| Boston Terrier        | Short  | no  | no   | GG | 11 | CC |
| Boston Terrier        | Short  | no  | no   | GG | 11 | CC |
| Bouvier des Flandres  | Medium | yes | no   |    | 22 |    |

|                               |        |     |      |    |    |    |
|-------------------------------|--------|-----|------|----|----|----|
| Bouvier des Flandres          | Medium | yes | no   | TT | 22 | CC |
| Bouvier des Flandres          | Medium | yes | no   | TT | 22 | CC |
| Boxer                         | Short  | no  | no   |    | 11 | CC |
| Boxer                         | Short  | no  | no   | GG | 11 | CC |
| Boxer                         | Short  | no  | no   | GG | 11 | CC |
| Boxer                         | Short  | no  | no   | GG | 11 | CC |
| Boxer                         | Short  | no  | no   | GG | 11 | CC |
| Boykin Spaniel*               | Medium | no  | both | TT | 11 | CC |
| Boykin Spaniel                | Medium | no  | both | TT | 11 | CT |
| Boykin Spaniel                | Medium | no  | both | TT | 11 | CT |
| Boykin Spaniel                | Medium | no  | both | TT | 11 | CT |
| Briard                        | Long   | yes | no   |    | 22 | CC |
| Briard                        | Long   | yes | no   |    | 22 | CC |
| Briard                        | Long   | yes | no   | TT | 22 | CC |
| Briard                        | Long   | yes | no   | TT | 22 | CC |
| Briard                        | Long   | yes | no   | TT | 22 | CC |
| Briard                        | Long   | yes | no   | TT | 22 | CC |
| Briard                        | Long   | yes | no   | TT | 22 | CC |
| Brittany                      | Long   | no  | no   | TT | 11 | CC |
| Brittany                      | Long   | no  | no   | TT | 11 | CC |
| Brittany                      | Long   | no  | no   | TT | 11 | CC |
| Brittany                      | Long   | no  | no   | TT | 11 | CC |
| Brittany                      | Long   | no  | no   | TT | 11 | CC |
| Brittany                      | Long   | no  | no   | TT | 11 | CC |
| Brittany                      | Long   | no  | no   | TT | 11 | CC |
| Brussels Griffon*             | Short  | no  | no   | GG | 11 | CC |
| Brussels Griffon              | Short  | no  | no   | GG | 11 | CC |
| Brussels Griffon              | Short  | yes | no   | GG | 12 | CC |
| Brussels Griffon              | Short  | yes | no   | GG | 12 | CC |
| Brussels Griffon              | Short  | yes | no   | GG | 22 | CC |
| Bulldog                       | Short  | no  | no   | GG |    | CC |
| Bullmastiff                   | Short  | no  | no   | GG | 11 | CC |
| Bullmastiff                   | Short  | no  | no   | GG | 11 | CC |
| Bullmastiff                   | Short  | no  | no   | GG | 11 | CC |
| Bullmastiff                   | Short  | no  | no   | GT | 11 | CC |
| Cairn Terrier                 | Medium | yes | no   | GG | 22 | CC |
| Cairn Terrier                 | Medium | yes | no   | GG | 22 | CC |
| Cairn Terrier                 | Medium | yes | no   | GG | 22 | CC |
| Cairn Terrier                 | Medium | yes | no   | GT | 22 | CC |
| Cairn Terrier                 | Medium | yes | no   |    | 22 | CC |
| Cardigan Welsh Corgi          | Medium | no  | no   | GG | 11 | CC |
| Cardigan Welsh Corgi          | Medium | no  | no   | GG | 11 | CC |
| Cardigan Welsh Corgi          | Medium | no  | no   | GT | 11 | CC |
| Cardigan Welsh Corgi          | Medium | no  | no   | TT | 11 | CC |
| Cavalier King Charles Spaniel | Long   | no  | no   | TT | 11 | CC |
| Cavalier King Charles Spaniel | Long   | no  | no   | TT | 11 | CC |
| Chesapeake Bay Retriever*     | Short  | no  | both | GG | 11 | CT |
| Chesapeake Bay Retriever      | Short  | no  | both | GG | 11 | CT |
| Chesapeake Bay Retriever      | Short  | no  | both | GG | 11 | CT |
| Chihuahua*                    | Varies | no  | no   | GG | 11 | CT |
| Chihuahua                     | Varies | no  | no   | GT | 11 | CC |
| Chihuahua                     | Varies | no  | no   | TT | 11 | CC |
| Chihuahua                     | Varies | no  | no   | TT | 11 | CC |
| Chihuahua                     | Varies | no  | no   | TT | 11 | CT |
| Chihuahua                     | Varies | no  | no   | TT | 11 | CT |
| Chinese Crested               | Long   | yes | no   | GT | 12 | CC |
| Chinese Crested               | Long   | yes | no   | TT | 22 | CC |
| Chinese Crested               | Long   | yes | no   | TT | 22 | CC |





|                        |        |     |    |    |    |    |  |
|------------------------|--------|-----|----|----|----|----|--|
| Dachshund              | Medium | yes | no | GG | 22 |    |  |
| Dachshund              | Short  | no  | no | GT | 11 | CC |  |
| Dachshund              | Short  | no  | no | GT | 11 | CC |  |
| Dachshund              | Short  | no  | no | GT | 11 | CC |  |
| Dachshund              | Short  | no  | no | GT | 11 | CC |  |
| Dachshund              | Short  | no  | no | GT | 11 | CC |  |
| Dachshund              | Short  | no  | no | GT | 11 | CC |  |
| Dachshund              | Short  | no  | no | GT | 11 | CC |  |
| Dachshund              | Short  | no  | no | GT | 11 | CC |  |
| Dachshund              | Short  | no  | no | GT | 11 | CC |  |
| Dachshund              | Short  | no  | no | GT | 11 | CC |  |
| Dachshund              | Short  | no  | no | GT | 11 | CC |  |
| Dachshund              | Medium | yes | no | GT | 12 | CC |  |
| Dachshund              | Medium | yes | no | GT | 12 | CC |  |
| Dachshund              | Medium | yes | no | GT | 12 | CC |  |
| Dachshund              | Medium | yes | no | GT | 12 | CC |  |
| Dachshund              | Long   | no  | no | TT | 11 | CC |  |
| Dachshund              | Long   | no  | no | TT | 11 | CC |  |
| Dachshund              | Long   | no  | no | TT | 11 | CC |  |
| Dachshund              | Long   | no  | no | TT | 11 | CC |  |
| Dachshund              | Long   | no  | no | TT | 11 | CC |  |
| Dachshund              | Long   | no  | no | TT | 11 | CC |  |
| Dachshund              | Long   | no  | no | TT | 11 | CC |  |
| Dachshund              | Long   | no  | no | TT | 11 | CC |  |
| Dachshund              | Long   | no  | no | TT | 11 | CC |  |
| Dachshund              | Long   | no  | no | TT | 11 | CC |  |
| Dachshund              | Long   | no  | no | TT | 11 | CC |  |
| Dachshund              | Long   | no  | no | TT | 11 | CC |  |
| Dachshund              | Long   | no  | no | TT | 11 | CC |  |
| Dachshund              | Long   | no  | no | TT | 11 | CC |  |
| Dachshund              | Long   | no  | no | TT | 11 | CC |  |
| Dachshund              | Long   | no  | no | TT | 11 | CC |  |
| Dachshund              | Long   | no  | no | TT | 11 | CC |  |
| Dachshund              | Long   | no  | no | TT | 11 | CC |  |
| Dachshund              | Long   | no  | no | TT | 11 | CC |  |
| Dachshund              | Long   | no  | no | TT | 11 | CC |  |
| Dachshund              | Long   | no  | no | TT | 11 | CC |  |
| Dachshund              | Long   | no  | no | TT | 11 | CC |  |
| Dachshund              | Long   | no  | no | TT | 11 | CC |  |
| Dachshund              | Long   | no  | no | TT | 11 | CC |  |
| Dachshund              | Long   | no  | no | TT | 11 | CC |  |
| Dachshund              | Long   | no  | no | TT | 11 | CC |  |
| Dachshund              | Long   | no  | no | TT | 11 | CC |  |
| Dachshund              | Long   | no  | no | TT | 11 | CC |  |
| Dachshund              | Long   | no  | no | TT | 11 | CC |  |
| Dachshund              | Long   | no  | no | TT | 11 | CC |  |
| Dachshund              | Long   | no  | no | TT | 11 | CC |  |
| Dachshund              | Long   | no  | no | TT | 11 | CC |  |
| Dachshund              | Long   | no  | no | TT | 11 | CC |  |
| Dachshund              | Long   | no  | no | TT | 11 | CC |  |
| Dachshund              | Short  | no  | no |    | 11 | CC |  |
| Dachshund              | Short  | no  | no |    | 11 |    |  |
| Dachshund <sup>e</sup> | Long   | yes | no | TT | 12 | CC |  |
| Dandie Dinmont Terrier | Medium | yes | no | GG | 22 | CC |  |
| Dandie Dinmont Terrier | Medium | yes | no | GG | 22 | CC |  |
| Dandie Dinmont Terrier | Medium | yes | no | GG | 22 | CC |  |
| Dandie Dinmont Terrier | Medium | yes | no | GG | 22 | CC |  |
| Dandie Dinmont Terrier | Medium | yes | no | GG | 22 | CC |  |
| Doberman Pinscher      | Short  | no  | no | GG | 11 | CC |  |
| Doberman Pinscher      | Short  | no  | no | GG | 11 | CC |  |
| Doberman Pinscher      | Short  | no  | no | GG | 11 | CC |  |
| Doberman Pinscher      | Short  | no  | no | GG | 11 | CC |  |
| Doberman Pinscher      | Short  | no  | no | GG | 11 | CC |  |
| Doberman Pinscher      | Short  | no  | no | GG | 11 | CC |  |
| English Cocker Spaniel | Long   | no  | no | TT | 11 | CC |  |
| English Cocker Spaniel | Long   | no  | no | TT | 11 | CC |  |
| English Cocker Spaniel | Long   | no  | no | TT | 11 | CC |  |
| English Cocker Spaniel | Long   | no  | no | TT | 11 | CC |  |
| English Setter         | Long   | no  | no | TT | 11 | CC |  |

|                            |        |     |    |    |    |    |
|----------------------------|--------|-----|----|----|----|----|
| English Springer Spaniel   | Long   | no  | no | TT | 11 | CC |
| English Springer Spaniel   | Long   | no  | no | TT | 11 | CC |
| English Springer Spaniel   | Long   | no  | no | TT | 11 | CC |
| English Springer Spaniel   | Long   | no  | no | TT | 11 | CC |
| English Springer Spaniel   | Long   | no  | no | TT | 11 | CC |
| English Springer Spaniel   | Long   | no  | no | TT | 11 | CC |
| Entlebucher Mountain Dog   | Short  | no  | no | GG | 11 | CC |
| Entlebucher Mountain Dog   | Short  | no  | no | GG | 11 | CC |
| Entlebucher Mountain Dog   | Short  | no  | no | GG | 11 | CC |
| Entlebucher Mountain Dog   | Short  | no  | no | GG | 11 | CC |
| Entlebucher Mountain Dog   | Short  | no  | no | GG | 11 | CC |
| Entlebucher Mountain Dog   | Short  | no  | no | GT | 11 | CC |
| Flat-Coated Retriever      | Long   | no  | no | TT | 11 | CC |
| Flat-coated Retriever      | Long   | no  | no | TT | 11 | CC |
| Flat-Coated Retriever      | Long   | no  | no | TT | 11 | CC |
| Flat-Coated Retriever      | Long   | no  | no | TT | 11 | CC |
| Flat-Coated Retriever      | Long   | no  | no | TT | 11 | CC |
| German Shepherd Dog        | Medium | no  | no | GG | 11 | CC |
| German Shepherd Dog        | Medium | no  | no | GT | 11 | CC |
| German Shepherd Dog        | Medium | no  | no | GT | 11 | CC |
| German Shepherd Dog        | Medium | no  | no | GT | 11 | CC |
| German Shepherd Dog        | Medium | no  | no |    | 11 | CC |
| German Shorthaired Pointer | Short  | no  | no | GG | 11 | CC |
| German Shorthaired Pointer | Short  | no  | no | GG | 11 | CC |
| German Shorthaired Pointer | Short  | no  | no | GG | 11 | CC |
| German Shorthaired Pointer | Short  | no  | no | GG | 11 | CC |
| German Shorthaired Pointer | Short  | no  | no | GG | 11 | CC |
| German Shorthaired Pointer | Short  | no  | no | GG | 11 | CC |
| German Shorthaired Pointer | Short  | no  | no |    | 11 | CC |
| German Wirehaired Pointer  | Medium | yes | no | GG | 12 | CC |
| German Wirehaired Pointer  | Medium | yes | no | GG | 12 | CC |
| German Wirehaired Pointer  | Medium | yes | no | GG | 22 | CC |
| German Wirehaired Pointer  | Medium | yes | no | GG | 22 | CC |
| German Wirehaired Pointer  | Medium | yes | no | GG | 22 | CC |
| Giant Schnauzer            | Medium | yes | no | GG | 22 | CC |
| Giant Schnauzer            | Medium | yes | no | TT | 22 | CC |
| Giant Schnauzer            | Medium | yes | no | TT | 22 | CC |
| Giant Schnauzer            | Medium | yes | no | TT | 22 | CC |
| Giant Schnauzer            | Medium | yes | no | TT | 22 | CC |
| Glen of Imaal Terrier      | Medium | yes | no | GG | 22 | CC |
| Glen of Imaal Terrier      | Medium | yes | no | GG | 22 | CC |
| Glen of Imaal Terrier      | Medium | yes | no | GG | 22 | CC |
| Glen of Imaal Terrier      | Medium | yes | no | GG | 22 | CC |
| Glen of Imaal Terrier      | Medium | yes | no | GG | 22 | CC |
| Glen of Imaal Terrier      | Medium | yes | no |    | 22 | CC |
| Golden Jackal              | Short  | no  | no |    | 11 | CC |
| Golden Jackal              | Short  | no  | no | GG | 11 | CC |
| Golden Jackal              | Short  | no  | no | GG | 11 | CC |
| Golden Jackal              | Short  | no  | no | GG | 11 | CC |
| Golden Jackal              | Short  | no  | no | GG | 11 | CC |
| Golden Jackal              | Short  | no  | no |    | 11 | CC |
| Golden Retriever           | Long   | no  | no | TT | 11 | CC |
| Golden Retriever           | Long   | no  | no | TT | 11 | CC |
| Golden Retriever           | Long   | no  | no | TT | 11 | CC |
| Gordon Setter              | Long   | no  | no | TT | 11 | CC |
| Gordon Setter              | Long   | no  | no | TT | 11 | CC |
| Gordon Setter              | Long   | no  | no | TT | 11 | CC |
| Gordon Setter              | Long   | no  | no | TT | 11 | CC |

|                            |       |     |     |    |    |    |
|----------------------------|-------|-----|-----|----|----|----|
| Gray wolf                  | Short | no  | no  | GG | 11 | CC |
| Gray wolf                  | Short | no  | no  | GG | 11 |    |
| Great Dane                 | Short | no  | no  | GG | 11 | CC |
| Great Dane                 | Short | no  | no  | GG | 11 | CC |
| Great Dane                 | Short | no  | no  | GG | 11 | CC |
| Great Dane                 | Short | no  | no  | GG | 11 | CC |
| Great Pyrenees             | Long  | no  | no  | TT | 11 | CC |
| Great Pyrenees             | Long  | no  | no  | TT | 11 | CC |
| Great Pyrenees             | Long  | no  | no  | TT | 11 | CC |
| Great Pyrenees             | Long  | no  | no  | TT | 11 | CC |
| Greater Swiss Mountain Dog | Short | no  | no  | GG | 11 | CC |
| Greater Swiss Mountain Dog | Short | no  | no  | GG | 11 |    |
| Greyhound                  | Short | no  | no  | GG | 11 | CC |
| Greyhound                  | Short | no  | no  | GG | 11 | CC |
| Greyhound                  | Short | no  | no  | GG | 11 | CC |
| Greyhound                  | Short | no  | no  | GG | 11 | CC |
| Greyhound                  | Short | no  | no  | GG | 11 | CC |
| Havanese                   | Long  | yes | no  | TT | 12 | CC |
| Havanese                   | Long  | yes | no  | TT | 22 | CC |
| Havanese                   | Long  | yes | no  | TT | 22 | CC |
| Havanese                   | Long  | yes | no  | TT | 22 | CC |
| Havanese                   | Long  | yes | no  | TT | 22 | CC |
| Havanese                   | Long  | yes | no  | TT | 22 | CC |
| Havanese                   | Long  | yes | no  | TT | 22 | CC |
| Havanese                   | Long  | yes | no  | TT | 22 | CT |
| Havanese                   | Long  | yes | no  | TT | 22 | CT |
| Havanese                   | Long  | yes | no  | TT | 22 | CT |
| Havanese                   | Long  | yes | no  | TT | 22 |    |
| Irish Terrier              | Short | yes | no  | GG | 22 | CC |
| Irish Terrier              | Short | yes | no  | GG | 22 | CC |
| Irish Terrier              | Short | yes | no  | GG | 22 | CC |
| Irish Water Spaniel        | Long  | no  | yes | TT | 11 | TT |
| Irish Water Spaniel        | Long  | no  | yes | TT | 11 | TT |
| Irish Water Spaniel        | Long  | no  | yes | TT | 11 | TT |
| Irish Water Spaniel        | Long  | no  | yes | TT | 11 | TT |
| Irish Water Spaniel        | Long  | no  | yes | TT | 11 | TT |
| Irish Water Spaniel        | Long  | no  | yes | TT | 11 | TT |
| Irish Water Spaniel        | Long  | no  | yes | TT | 11 | TT |
| Irish Water Spaniel        | Long  | no  | yes | TT | 11 | TT |
| Irish Water Spaniel        | Long  | no  | yes | TT | 11 | TT |
| Irish Water Spaniel        | Long  | no  | yes | TT | 11 | TT |
| Irish Water Spaniel        | Long  | no  | yes | TT | 11 | TT |
| Irish Water Spaniel        | Long  | no  | yes | TT | 11 | TT |
| Irish Water Spaniel        | Long  | no  | yes | TT | 11 | TT |
| Irish Water Spaniel        | Long  | no  | yes | TT | 11 | TT |
| Irish Water Spaniel        | Long  | no  | yes | TT | 11 | TT |
| Irish Water Spaniel        | Long  | no  | yes | TT | 11 | TT |
| Irish Water Spaniel        | Long  | no  | yes | TT | 11 | TT |
| Irish Water Spaniel        | Long  | no  | yes | TT | 11 | TT |
| Irish Water Spaniel        | Long  | no  | yes | TT | 11 | TT |
| Irish Water Spaniel        | Long  | no  | yes | TT | 11 | TT |
| Irish Wolfhound            | Short | yes | no  | GG | 22 | CC |
| Irish Wolfhound            | Short | yes | no  | GG | 22 | CC |
| Irish Wolfhound            | Short | yes | no  | GG | 22 | CC |
| Irish Wolfhound            | Short | yes | no  | GG | 22 | CC |
| Irish Wolfhound            | Short | yes | no  | GG | 22 | CC |
| Irish Wolfhound            | Short | yes | no  | GG | 22 | CC |
| Irish Wolfhound            | Short | yes | no  | GG | 22 |    |
| Italian Greyhound          | Short | no  | no  | GG | 11 | CC |





|                                   |        |     |      |    |    |    |
|-----------------------------------|--------|-----|------|----|----|----|
| Portuguese Water Dog              | Long   | yes | both | TT | 22 | CT |
| Portuguese Water Dog              | Long   | yes | both | TT | 22 | CT |
| Portuguese Water Dog              | Long   | yes | both | TT | 22 | CT |
| Portuguese Water Dog              | Long   | yes | both | TT | 22 | CT |
| Portuguese Water Dog              | Long   | yes | both | TT | 22 | CT |
| Portuguese Water Dog              | Long   | yes | both | TT | 22 | TT |
| Portuguese Water Dog              | Long   | yes | both | TT | 22 | TT |
| Portuguese Water Dog              | Long   | yes | both | TT | 22 | TT |
| Portuguese Water Dog              | Long   | yes | both | TT | 22 | TT |
| Portuguese Water Dog              | Long   | yes | both | TT | 22 | TT |
| Portuguese Water Dog              | Long   | yes | both |    | 22 | CC |
| Portuguese Water Dog              | Long   | yes | both |    | 22 | CC |
| Portuguese Water Dog <sup>†</sup> | Long   | no  | both | TT | 11 | CT |
| Portuguese Water Dog <sup>†</sup> | Long   | no  | both |    | 11 | TT |
| Pug                               | Short  | no  | no   | GG | 11 | CC |
| Pug                               | Short  | no  | no   | GG | 11 | CC |
| Pug                               | Short  | no  | no   | GG | 11 | CC |
| Pug                               | Short  | no  | no   | GG | 11 | CC |
| Pug                               | Short  | no  | no   | GG | 11 | CC |
| Pug                               | Short  | no  | no   | GG | 11 | CC |
| Pug                               | Short  | no  | no   | GG | 11 | CC |
| Pug                               | Short  | no  | no   | GG | 11 | CC |
| Pug                               | Short  | no  | no   | GG | 11 | CC |
| Pug                               | Short  | no  | no   | GG | 11 | CC |
| Pug                               | Short  | no  | no   | GG | 11 | CC |
| Pug                               | Short  | no  | no   | GG | 11 | CC |
| Pug                               | Short  | no  | no   | GG | 11 | CC |
| Rottweiler                        | Short  | no  | no   | GG | 11 | CC |
| Rottweiler                        | Short  | no  | no   | GG | 11 | CC |
| Rottweiler                        | Short  | no  | no   | GG | 11 | CC |
| Rottweiler                        | Short  | no  | no   | GG | 11 | CC |
| Rottweiler                        | Short  | no  | no   | GG | 11 | CC |
| Rottweiler                        | Short  | no  | no   | GG | 11 | CC |
| Rottweiler                        | Short  | no  | no   | GT | 11 | CC |
| Saint Bernard*                    | Varies | no  | no   | GT | 11 | CC |
| Saint Bernard                     | Varies | no  | no   | GT | 11 | CC |
| Saint Bernard                     | Varies | no  | no   | GT | 11 | CC |
| Saint Bernard                     | Varies | no  | no   | GT | 11 | CC |
| Saint Bernard                     | Varies | no  | no   | TT | 11 | CC |
| Saint Bernard                     | Varies | no  | no   | TT | 11 | CC |
| Saluki*                           | Varies | no  | no   | GG | 11 | CC |
| Saluki                            | Varies | no  | no   | GT | 11 | CC |
| Saluki                            | Varies | no  | no   | TT | 11 | CC |
| Saluki                            | Varies | no  | no   | TT | 11 | CC |
| Saluki                            | Varies | no  | no   | TT | 11 | CC |
| Saluki                            | Varies | no  | no   | TT | 11 | CC |
| Saluki                            | Varies | no  | no   | TT | 11 | CC |
| Saluki                            | Varies | no  | no   | TT | 11 | CC |
| Samoyed                           | Long   | no  | no   | GT | 11 | CC |
| Samoyed                           | Long   | no  | no   | TT | 11 | CC |
| Samoyed                           | Long   | no  | no   | TT | 11 | CC |
| Scottish Deerhound                | Short  | yes | no   | GG | 22 | CC |
| Scottish Deerhound                | Short  | yes | no   | GG | 22 | CC |
| Scottish Deerhound                | Short  | yes | no   | GG | 22 | CC |
| Scottish Deerhound                | Short  | yes | no   | GG | 22 | CC |
| Scottish Deerhound                | Short  | yes | no   | GG | 22 | CC |
| Scottish Deerhound                | Short  | yes | no   | GT | 22 | CC |



|                             |        |     |      |    |    |    |
|-----------------------------|--------|-----|------|----|----|----|
| Standard Poodle             | Long   | yes | yes  | TT | 22 | TT |
| Standard Poodle             | Long   | yes | yes  | TT | 22 | TT |
| Standard Poodle             | Long   | yes | yes  | TT | 22 | CC |
| Standard Schnauzer          | Medium | yes | no   |    | 22 | CC |
| Standard Schnauzer          | Medium | yes | no   | GG | 22 | CC |
| Standard Schnauzer          | Medium | yes | no   | GG | 22 | CC |
| Standard Schnauzer          | Medium | yes | no   | GG | 22 | CC |
| Standard Schnauzer          | Medium | yes | no   | GG | 22 | CC |
| Standard Schnauzer          | Medium | yes | no   | GG | 22 | CC |
| Sussex Spaniel              | Long   | no  | no   | TT | 11 | CC |
| Sussex Spaniel              | Long   | no  | no   | TT | 11 | CC |
| Sussex Spaniel              | Long   | no  | no   | TT | 11 | CC |
| Sussex Spaniel              | Long   | no  | no   | TT | 11 | CC |
| Sussex Spaniel              | Long   | no  | no   | TT | 11 | CC |
| Sussex Spaniel              | Long   | no  | no   | TT | 11 | CC |
| Sussex Spaniel              | Long   | no  | no   | TT | 11 | CC |
| Swedish Vallhund            | Medium | no  | no   | GG | 11 | CC |
| Swedish Vallhund            | Medium | no  | no   | GG | 11 | CC |
| Swedish Vallhund            | Medium | no  | no   | GG | 11 | CC |
| Swedish Vallhund            | Medium | no  | no   | GG | 11 | CC |
| Tibetan Mastiff             | Medium | no  | no   | GG | 11 | CC |
| Toy Fox Terrier             | Short  | no  | no   | GG | 11 | CC |
| Toy Fox Terrier             | Short  | no  | no   | GG | 11 | CC |
| Toy Fox Terrier             | Short  | no  | no   | GG | 11 | CC |
| Toy Fox Terrier             | Short  | no  | no   | GG | 11 |    |
| Welsh Terrier*              | Medium | yes | both | GG | 22 | TT |
| Welsh Terrier               | Medium | yes | both | GG | 22 | TT |
| West Highland White Terrier | Medium | yes | no   | GG | 22 | CC |
| West Highland White Terrier | Medium | yes | no   | GG | 22 | CC |
| West Highland White Terrier | Medium | yes | no   | GG | 22 | CC |
| West Highland White Terrier | Medium | yes | no   | GG | 22 | CC |
| West Highland White Terrier | Medium | yes | no   | GG | 22 | CC |
| West Highland White Terrier | Medium | yes | no   | GG | 22 | CC |
| West Highland White Terrier | Medium | yes | no   | GG | 22 | CC |
| West Highland White Terrier | Medium | yes | no   | GG | 22 | CC |
| West Highland White Terrier | Medium | yes | no   | GT | 22 | CC |
| West Highland White Terrier | Medium | yes | no   | GT | 22 | CC |
| West Highland White Terrier | Medium | yes | no   | GT | 22 | CC |
| West Highland White Terrier | Medium | yes | no   | GT | 22 | CC |
| West Highland White Terrier | Medium | yes | no   | GT | 22 | CC |
| West Highland White Terrier | Medium | yes | no   | TT | 22 | CC |
| Whippet                     | Short  | no  | no   | GG | 11 | CC |
| Whippet                     | Short  | no  | no   | GG | 11 | CC |
| Whippet                     | Short  | no  | no   | GG | 11 | CC |
| Wire Fox Terrier            | Short  | yes | both | GG | 22 | TT |
| Wire Fox Terrier            | Short  | yes | both | GG | 22 |    |
| Wire Fox Terrier            | Short  | yes | both | GG | 22 | TT |
| Wirehaired Pointing Griffon | Short  | yes | no   |    | 22 |    |
| wolf                        | Short  | no  | no   | GG | 11 | CC |
| wolf                        | Short  | no  | no   | GG | 11 | CC |
| wolf                        | Short  | no  | no   | GG | 11 |    |
| Yorkshire Terrier           | Long   | yes | no   | GG | 22 | CC |
| Yorkshire Terrier           | Long   | yes | no   | GG | 22 | CC |
| Yorkshire Terrier           | Long   | yes | no   | GG | 22 | CC |
| Yorkshire Terrier           | Long   | yes | no   | GG | 22 | CC |
| Yorkshire Terrier           | Long   | yes | no   | GG | 22 | CC |



|                   |      |     |    |    |    |    |
|-------------------|------|-----|----|----|----|----|
| Yorkshire Terrier | Long | yes | no | GT | 22 | CC |
| Yorkshire Terrier | Long | yes | no | GT | 22 | CC |
| Yorkshire Terrier | Long | yes | no | GT | 22 | CC |
| Yorkshire Terrier | Long | yes | no | GT | 22 | CC |
| Yorkshire Terrier | Long | yes | no | GT | 22 | CC |
| Yorkshire Terrier | Long | yes | no | TT | 22 | CC |
| Yorkshire Terrier | Long | yes | no |    | 22 | CC |

Samples:

|             |                    |              |
|-------------|--------------------|--------------|
| <b>Long</b> | <b>Furnishings</b> | <b>Curly</b> |
| <b>long</b> | <b>Furnishings</b> | <b>curly</b> |
| <b>292</b>  | <b>298</b>         | <b>36</b>    |

|              |                       |                  |
|--------------|-----------------------|------------------|
| <b>Short</b> | <b>No Furnishings</b> | <b>Non curly</b> |
| <b>204</b>   | <b>406</b>            | <b>538</b>       |

|                           |                            |
|---------------------------|----------------------------|
| <b>Not fixed for long</b> | <b>Not fixed for curly</b> |
| <b>27</b>                 | <b>87</b>                  |

|               |
|---------------|
| <b>Medium</b> |
| <b>148</b>    |

|                      |                      |                      |
|----------------------|----------------------|----------------------|
| <b>Total Samples</b> | <b>Total Samples</b> | <b>Total Samples</b> |
| <b>671</b>           | <b>704</b>           | <b>661</b>           |

a) Hair length is fixed in some breeds (long, medium, short) but others have varieties with different lengths indicated by "varies".

b) Allele T is associated with the long hair phenotype and is recessive.

associated with furnishings and

d) Allele T is associated with the curly hair phenotype and is dominant.

e) Dachshund with the rare "softwire" phenotype: long hair with furnishings.

f) Portuguese Water Dog with improper coat: does not have furnishings.

\*) Breeds where at least one of the phenotypes is not fixed. If the phenotype of the individual is known then it is given otherwise it is listed as "varies" (for length) or "both" for furnishings or curl.

- Individual noted in red color indicates dog for which the genotypes do not explain the observed phenotype.

Table S2. List of 80 breeds that make up the CanMap dataset including 903 samples for whole genome association analysis using the multi-breed approach. For each phenotype, the data set was divided into cases and controls based on standard breed description.

| Breed                   | Breed ID | Samples | Length | Furnishings | Curl |
|-------------------------|----------|---------|--------|-------------|------|
| Afghan Hound            | AFGH     | 1       | long   | no          | no   |
| Afghan Hound            | AFGH     | 2       | long   | no          | no   |
| Afghan Hound            | AFGH     | 3       | long   | no          | no   |
| Afghan Hound            | AFGH     | 4       | long   | no          | no   |
| Afghan Hound            | AFGH     | 5       | long   | no          | no   |
| Afghan Hound            | AFGH     | 6       | long   | no          | no   |
| Afghan Hound            | AFGH     | 7       | long   | no          | no   |
| Afghan Hound            | AFGH     | 8       | long   | no          | no   |
| Afghan Hound            | AFGH     | 9       | long   | no          | no   |
| Afghan Hound            | AFGH     | 10      | long   | no          | no   |
| Afghan Hound            | AFGH     | 11      | long   | no          | no   |
| Afghan Hound            | AFGH     | 12      | long   | no          | no   |
| Akita                   | AKIT     | 13      | short  | no          | n.d. |
| Akita                   | AKIT     | 14      | short  | no          | n.d. |
| Akita                   | AKIT     | 15      | short  | no          | n.d. |
| Akita                   | AKIT     | 16      | short  | no          | n.d. |
| Akita                   | AKIT     | 17      | short  | no          | n.d. |
| Akita                   | AKIT     | 18      | short  | no          | n.d. |
| Akita                   | AKIT     | 19      | short  | no          | n.d. |
| Akita                   | AKIT     | 20      | short  | no          | n.d. |
| Akita                   | AKIT     | 21      | short  | no          | n.d. |
| Akita                   | AKIT     | 22      | short  | no          | n.d. |
| Akita                   | AKIT     | 23      | short  | no          | n.d. |
| Akita                   | AKIT     | 24      | short  | no          | n.d. |
| Alaskan Malamute        | AMAL     | 25      | n.d.   | no          | no   |
| Alaskan Malamute        | AMAL     | 26      | n.d.   | no          | no   |
| Alaskan Malamute        | AMAL     | 27      | n.d.   | no          | no   |
| Alaskan Malamute        | AMAL     | 28      | n.d.   | no          | no   |
| Alaskan Malamute        | AMAL     | 29      | n.d.   | no          | no   |
| Alaskan Malamute        | AMAL     | 30      | n.d.   | no          | no   |
| Alaskan Malamute        | AMAL     | 31      | n.d.   | no          | no   |
| Alaskan Malamute        | AMAL     | 32      | n.d.   | no          | no   |
| Alaskan Malamute        | AMAL     | 33      | n.d.   | no          | no   |
| Alaskan Malamute        | AMAL     | 34      | n.d.   | no          | no   |
| Alaskan Malamute        | AMAL     | 35      | n.d.   | no          | no   |
| Alaskan Malamute        | AMAL     | 36      | n.d.   | no          | no   |
| American Cocker Spaniel | ACKR     | 37      | long   | no          | no   |
| American Cocker Spaniel | ACKR     | 38      | long   | no          | no   |
| American Cocker Spaniel | ACKR     | 39      | long   | no          | no   |
| American Cocker Spaniel | ACKR     | 40      | long   | no          | no   |
| American Cocker Spaniel | ACKR     | 41      | long   | no          | no   |
| American Cocker Spaniel | ACKR     | 42      | long   | no          | no   |
| American Cocker Spaniel | ACKR     | 43      | long   | no          | no   |
| American Cocker Spaniel | ACKR     | 44      | long   | no          | no   |
| American Cocker Spaniel | ACKR     | 45      | long   | no          | no   |
| American Cocker Spaniel | ACKR     | 46      | long   | no          | no   |
| American Cocker Spaniel | ACKR     | 47      | long   | no          | no   |

|                         |      |     |       |     |      |
|-------------------------|------|-----|-------|-----|------|
| American Cocker Spaniel | ACKR | 48  | long  | no  | no   |
| American Eskimo Dog     | AESK | 49  | long  | no  | no   |
| American Eskimo Dog     | AESK | 50  | long  | no  | no   |
| American Eskimo Dog     | AESK | 51  | long  | no  | no   |
| American Eskimo Dog     | AESK | 52  | long  | no  | no   |
| American Eskimo Dog     | AESK | 53  | long  | no  | no   |
| American Eskimo Dog     | AESK | 54  | long  | no  | no   |
| American Eskimo Dog     | AESK | 55  | long  | no  | no   |
| Australian Shepherd     | AUSS | 56  | long  | no  | no   |
| Australian Shepherd     | AUSS | 57  | long  | no  | no   |
| Australian Shepherd     | AUSS | 58  | long  | no  | no   |
| Australian Shepherd     | AUSS | 59  | long  | no  | no   |
| Australian Shepherd     | AUSS | 60  | long  | no  | no   |
| Australian Shepherd     | AUSS | 61  | long  | no  | no   |
| Australian Shepherd     | AUSS | 62  | long  | no  | no   |
| Australian Shepherd     | AUSS | 63  | long  | no  | no   |
| Australian Shepherd     | AUSS | 64  | long  | no  | no   |
| Australian Shepherd     | AUSS | 65  | long  | no  | no   |
| Australian Shepherd     | AUSS | 66  | long  | no  | no   |
| Australian Shepherd     | AUSS | 67  | long  | no  | no   |
| Australian Terrier      | AUST | 68  | n.d.  | yes | no   |
| Australian Terrier      | AUST | 69  | n.d.  | yes | no   |
| Australian Terrier      | AUST | 70  | n.d.  | yes | no   |
| Australian Terrier      | AUST | 71  | n.d.  | yes | no   |
| Australian Terrier      | AUST | 72  | n.d.  | yes | no   |
| Australian Terrier      | AUST | 73  | n.d.  | yes | no   |
| Australian Terrier      | AUST | 74  | n.d.  | yes | no   |
| Australian Terrier      | AUST | 75  | n.d.  | yes | no   |
| Australian Terrier      | AUST | 76  | n.d.  | yes | no   |
| Australian Terrier      | AUST | 77  | n.d.  | yes | no   |
| Australian Terrier      | AUST | 78  | n.d.  | yes | no   |
| Australian Terrier      | AUST | 79  | n.d.  | yes | no   |
| Basenji                 | BSJI | 80  | short | no  | n.d. |
| Basenji                 | BSJI | 81  | short | no  | n.d. |
| Basenji                 | BSJI | 82  | short | no  | n.d. |
| Basenji                 | BSJI | 83  | short | no  | n.d. |
| Basenji                 | BSJI | 84  | short | no  | n.d. |
| Basenji                 | BSJI | 85  | short | no  | n.d. |
| Basenji                 | BSJI | 86  | short | no  | n.d. |
| Basenji                 | BSJI | 87  | short | no  | n.d. |
| Basenji                 | BSJI | 88  | short | no  | n.d. |
| Basenji                 | BSJI | 89  | short | no  | n.d. |
| Basenji                 | BSJI | 90  | short | no  | n.d. |
| Basenji                 | BSJI | 91  | short | no  | n.d. |
| Basset Hound            | BASS | 92  | short | no  | n.d. |
| Basset Hound            | BASS | 93  | short | no  | n.d. |
| Basset Hound            | BASS | 94  | short | no  | n.d. |
| Basset Hound            | BASS | 95  | short | no  | n.d. |
| Basset Hound            | BASS | 96  | short | no  | n.d. |
| Basset Hound            | BASS | 97  | short | no  | n.d. |
| Basset Hound            | BASS | 98  | short | no  | n.d. |
| Basset Hound            | BASS | 99  | short | no  | n.d. |
| Basset Hound            | BASS | 100 | short | no  | n.d. |
| Basset Hound            | BASS | 101 | short | no  | n.d. |
| Basset Hound            | BASS | 102 | short | no  | n.d. |

|                      |      |     |       |    |      |
|----------------------|------|-----|-------|----|------|
| Basset Hound         | BASS | 103 | short | no | n.d. |
| Beagle               | BEAG | 104 | short | no | n.d. |
| Beagle               | BEAG | 105 | short | no | n.d. |
| Beagle               | BEAG | 106 | short | no | n.d. |
| Beagle               | BEAG | 107 | short | no | n.d. |
| Beagle               | BEAG | 108 | short | no | n.d. |
| Beagle               | BEAG | 109 | short | no | n.d. |
| Beagle               | BEAG | 110 | short | no | n.d. |
| Beagle               | BEAG | 111 | short | no | n.d. |
| Beagle               | BEAG | 112 | short | no | n.d. |
| Beagle               | BEAG | 113 | short | no | n.d. |
| Beagle               | BEAG | 114 | short | no | n.d. |
| Beagle               | BEAG | 115 | short | no | n.d. |
| Bernese Mountain Dog | BMD- | 116 | long  | no | no   |
| Bernese Mountain Dog | BMD- | 117 | long  | no | no   |
| Bernese Mountain Dog | BMD- | 118 | long  | no | no   |
| Bernese Mountain Dog | BMD- | 119 | long  | no | no   |
| Bernese Mountain Dog | BMD- | 120 | long  | no | no   |
| Bernese Mountain Dog | BMD- | 121 | long  | no | no   |
| Bernese Mountain Dog | BMD- | 122 | long  | no | no   |
| Bernese Mountain Dog | BMD- | 123 | long  | no | no   |
| Bernese Mountain Dog | BMD- | 124 | long  | no | no   |
| Bernese Mountain Dog | BMD- | 125 | long  | no | no   |
| Bernese Mountain Dog | BMD- | 126 | long  | no | no   |
| Bernese Mountain Dog | BMD- | 127 | long  | no | no   |
| Bloodhound           | BLDH | 128 | short | no | n.d. |
| Bloodhound           | BLDH | 129 | short | no | n.d. |
| Bloodhound           | BLDH | 130 | short | no | n.d. |
| Bloodhound           | BLDH | 131 | short | no | n.d. |
| Bloodhound           | BLDH | 132 | short | no | n.d. |
| Bloodhound           | BLDH | 133 | short | no | n.d. |
| Bloodhound           | BLDH | 134 | short | no | n.d. |
| Bloodhound           | BLDH | 135 | short | no | n.d. |
| Bloodhound           | BLDH | 136 | short | no | n.d. |
| Border Collie        | BORD | 137 | n.d.  | no | n.d. |
| Border Collie        | BORD | 138 | n.d.  | no | n.d. |
| Border Collie        | BORD | 139 | n.d.  | no | n.d. |
| Border Collie        | BORD | 140 | n.d.  | no | n.d. |
| Border Collie        | BORD | 141 | n.d.  | no | n.d. |
| Border Collie        | BORD | 142 | n.d.  | no | n.d. |
| Border Collie        | BORD | 143 | n.d.  | no | n.d. |
| Border Collie        | BORD | 144 | n.d.  | no | n.d. |
| Border Collie        | BORD | 145 | n.d.  | no | n.d. |
| Border Collie        | BORD | 146 | n.d.  | no | n.d. |
| Border Collie        | BORD | 147 | n.d.  | no | n.d. |
| Border Collie        | BORD | 148 | n.d.  | no | n.d. |
| Borzoï               | BORZ | 149 | long  | no | no   |
| Borzoï               | BORZ | 150 | long  | no | no   |
| Borzoï               | BORZ | 151 | long  | no | no   |
| Borzoï               | BORZ | 152 | long  | no | no   |
| Borzoï               | BORZ | 153 | long  | no | no   |
| Borzoï               | BORZ | 154 | long  | no | no   |
| Borzoï               | BORZ | 155 | long  | no | no   |
| Borzoï               | BORZ | 156 | long  | no | no   |
| Borzoï               | BORZ | 157 | long  | no | no   |

|                  |      |     |       |      |      |
|------------------|------|-----|-------|------|------|
| Borzoi           | BORZ | 158 | long  | no   | no   |
| Borzoi           | BORZ | 159 | long  | no   | no   |
| Borzoi           | BORZ | 160 | long  | no   | no   |
| Boston Terrier   | BOST | 161 | short | no   | n.d. |
| Boston Terrier   | BOST | 162 | short | no   | n.d. |
| Boston Terrier   | BOST | 163 | short | no   | n.d. |
| Boston Terrier   | BOST | 164 | short | no   | n.d. |
| Boston Terrier   | BOST | 165 | short | no   | n.d. |
| Boston Terrier   | BOST | 166 | short | no   | n.d. |
| Boxer            | BOX- | 167 | short | no   | n.d. |
| Boxer            | BOX- | 168 | short | no   | n.d. |
| Boxer            | BOX- | 169 | short | no   | n.d. |
| Boxer            | BOX- | 170 | short | no   | n.d. |
| Boxer            | BOX- | 171 | short | no   | n.d. |
| Boxer            | BOX- | 172 | short | no   | n.d. |
| Boxer            | BOX- | 173 | short | no   | n.d. |
| Boxer            | BOX- | 174 | short | no   | n.d. |
| Boxer            | BOX- | 175 | short | no   | n.d. |
| Boxer            | BOX- | 176 | short | no   | n.d. |
| Boxer            | BOX- | 177 | short | no   | n.d. |
| Boxer            | BOX- | 178 | short | no   | n.d. |
| Briard           | BRIA | 179 | long  | yes  | no   |
| Briard           | BRIA | 180 | long  | yes  | no   |
| Briard           | BRIA | 181 | long  | yes  | no   |
| Briard           | BRIA | 182 | long  | yes  | no   |
| Briard           | BRIA | 183 | long  | yes  | no   |
| Briard           | BRIA | 184 | long  | yes  | no   |
| Briard           | BRIA | 185 | long  | yes  | no   |
| Briard           | BRIA | 186 | long  | yes  | no   |
| Briard           | BRIA | 187 | long  | yes  | no   |
| Briard           | BRIA | 188 | long  | yes  | no   |
| Briard           | BRIA | 189 | long  | yes  | no   |
| Briard           | BRIA | 190 | long  | yes  | no   |
| Brittany         | BRIT | 191 | long  | no   | no   |
| Brittany         | BRIT | 192 | long  | no   | no   |
| Brittany         | BRIT | 193 | long  | no   | no   |
| Brittany         | BRIT | 194 | long  | no   | no   |
| Brittany         | BRIT | 195 | long  | no   | no   |
| Brittany         | BRIT | 196 | long  | no   | no   |
| Brittany         | BRIT | 197 | long  | no   | no   |
| Brittany         | BRIT | 198 | long  | no   | no   |
| Brittany         | BRIT | 199 | long  | no   | no   |
| Brittany         | BRIT | 200 | long  | no   | no   |
| Brittany         | BRIT | 201 | long  | no   | no   |
| Brittany         | BRIT | 202 | long  | no   | no   |
| Brussels Griffon | BRUS | 203 | short | yes  | n.d. |
| Brussels Griffon | BRUS | 204 | short | n.d. | n.d. |
| Brussels Griffon | BRUS | 205 | short | no   | n.d. |
| Brussels Griffon | BRUS | 206 | short | yes  | n.d. |
| Brussels Griffon | BRUS | 207 | short | n.d. | n.d. |
| Brussels Griffon | BRUS | 208 | short | n.d. | n.d. |
| Brussels Griffon | BRUS | 209 | short | n.d. | n.d. |
| Bull Terrier     | BULT | 210 | short | no   | n.d. |
| Bull Terrier     | BULT | 211 | short | no   | n.d. |
| Bull Terrier     | BULT | 212 | short | no   | n.d. |

|                              |      |     |       |     |      |
|------------------------------|------|-----|-------|-----|------|
| Bulldog                      | BULD | 213 | short | no  | n.d. |
| Bulldog                      | BULD | 214 | short | no  | n.d. |
| Bulldog                      | BULD | 215 | short | no  | n.d. |
| Bulldog                      | BULD | 216 | short | no  | n.d. |
| Bulldog                      | BULD | 217 | short | no  | n.d. |
| Bulldog                      | BULD | 218 | short | no  | n.d. |
| Bulldog                      | BULD | 219 | short | no  | n.d. |
| Bulldog                      | BULD | 220 | short | no  | n.d. |
| Bulldog                      | BULD | 221 | short | no  | n.d. |
| Bulldog                      | BULD | 222 | short | no  | n.d. |
| Bulldog                      | BULD | 223 | short | no  | n.d. |
| Bullmastiff                  | BULM | 224 | short | no  | n.d. |
| Bullmastiff                  | BULM | 225 | short | no  | n.d. |
| Bullmastiff                  | BULM | 226 | short | no  | n.d. |
| Bullmastiff                  | BULM | 227 | short | no  | n.d. |
| Bullmastiff                  | BULM | 228 | short | no  | n.d. |
| Bullmastiff                  | BULM | 229 | short | no  | n.d. |
| Bullmastiff                  | BULM | 230 | short | no  | n.d. |
| Bullmastiff                  | BULM | 231 | short | no  | n.d. |
| Bullmastiff                  | BULM | 232 | short | no  | n.d. |
| Bullmastiff                  | BULM | 233 | short | no  | n.d. |
| Bullmastiff                  | BULM | 234 | short | no  | n.d. |
| Bullmastiff                  | BULM | 235 | short | no  | n.d. |
| Cairn Terrier                | CAIR | 236 | n.d.  | yes | no   |
| Cairn Terrier                | CAIR | 237 | n.d.  | yes | no   |
| Cairn Terrier                | CAIR | 238 | n.d.  | yes | no   |
| Cairn Terrier                | CAIR | 239 | n.d.  | yes | no   |
| Cairn Terrier                | CAIR | 240 | n.d.  | yes | no   |
| Cairn Terrier                | CAIR | 241 | n.d.  | yes | no   |
| Cairn Terrier                | CAIR | 242 | n.d.  | yes | no   |
| Cairn Terrier                | CAIR | 243 | n.d.  | yes | no   |
| Cairn Terrier                | CAIR | 244 | n.d.  | yes | no   |
| Cairn Terrier                | CAIR | 245 | n.d.  | yes | no   |
| Cairn Terrier                | CAIR | 246 | n.d.  | yes | no   |
| Cairn Terrier                | CAIR | 247 | n.d.  | yes | no   |
| Cardigan Welsh Corgi         | CARD | 248 | n.d.  | no  | no   |
| Cardigan Welsh Corgi         | CARD | 249 | n.d.  | no  | no   |
| Cardigan Welsh Corgi         | CARD | 250 | n.d.  | no  | no   |
| Cardigan Welsh Corgi         | CARD | 251 | n.d.  | no  | no   |
| Cardigan Welsh Corgi         | CARD | 252 | n.d.  | no  | no   |
| Cardigan Welsh Corgi         | CARD | 253 | n.d.  | no  | no   |
| Cardigan Welsh Corgi         | CARD | 254 | n.d.  | no  | no   |
| Cardigan Welsh Corgi         | CARD | 255 | n.d.  | no  | no   |
| Cardigan Welsh Corgi         | CARD | 256 | n.d.  | no  | no   |
| Cardigan Welsh Corgi         | CARD | 257 | n.d.  | no  | no   |
| Cardigan Welsh Corgi         | CARD | 258 | n.d.  | no  | no   |
| Cardigan Welsh Corgi         | CARD | 259 | n.d.  | no  | no   |
| Cavalier King Charles Spanie | CKCS | 260 | long  | no  | no   |
| Cavalier King Charles Spanie | CKCS | 261 | long  | no  | no   |
| Cavalier King Charles Spanie | CKCS | 262 | long  | no  | no   |
| Cavalier King Charles Spanie | CKCS | 263 | long  | no  | no   |
| Cavalier King Charles Spanie | CKCS | 264 | long  | no  | no   |
| Cavalier King Charles Spanie | CKCS | 265 | long  | no  | no   |
| Cavalier King Charles Spanie | CKCS | 266 | long  | no  | no   |
| Cavalier King Charles Spanie | CKCS | 267 | long  | no  | no   |

|                              |      |     |       |      |      |
|------------------------------|------|-----|-------|------|------|
| Cavalier King Charles Spanie | CKCS | 268 | long  | no   | no   |
| Cavalier King Charles Spanie | CKCS | 269 | long  | no   | no   |
| Cavalier King Charles Spanie | CKCS | 270 | long  | no   | no   |
| Cavalier King Charles Spanie | CKCS | 271 | long  | no   | no   |
| Chihuahua                    | CHIH | 272 | n.d.  | no   | n.d. |
| Chihuahua                    | CHIH | 273 | long  | no   | n.d. |
| Chihuahua                    | CHIH | 274 | long  | no   | n.d. |
| Chihuahua                    | CHIH | 275 | n.d.  | no   | n.d. |
| Chihuahua                    | CHIH | 276 | long  | no   | n.d. |
| Chihuahua                    | CHIH | 277 | short | no   | n.d. |
| Chihuahua                    | CHIH | 278 | short | no   | n.d. |
| Chihuahua                    | CHIH | 279 | n.d.  | no   | n.d. |
| Chihuahua                    | CHIH | 280 | n.d.  | no   | n.d. |
| Chinese Shar-Pei             | SHAR | 281 | short | no   | n.d. |
| Chinese Shar-Pei             | SHAR | 282 | short | no   | n.d. |
| Chinese Shar-Pei             | SHAR | 283 | short | no   | n.d. |
| Chinese Shar-Pei             | SHAR | 284 | short | no   | n.d. |
| Chinese Shar-Pei             | SHAR | 285 | short | no   | n.d. |
| Chinese Shar-Pei             | SHAR | 286 | short | no   | n.d. |
| Chinese Shar-Pei             | SHAR | 287 | short | no   | n.d. |
| Chinese Shar-Pei             | SHAR | 288 | short | no   | n.d. |
| Chinese Shar-Pei             | SHAR | 289 | short | no   | n.d. |
| Chinese Shar-Pei             | SHAR | 290 | short | no   | n.d. |
| Chinese Shar-Pei             | SHAR | 291 | short | no   | n.d. |
| Chinese Shar-Pei             | SHAR | 292 | short | no   | n.d. |
| Chow Chow                    | CHOW | 293 | n.d.  | no   | no   |
| Chow Chow                    | CHOW | 294 | n.d.  | no   | no   |
| Chow Chow                    | CHOW | 295 | n.d.  | no   | no   |
| Chow Chow                    | CHOW | 296 | n.d.  | no   | no   |
| Chow Chow                    | CHOW | 297 | n.d.  | no   | no   |
| Chow Chow                    | CHOW | 298 | n.d.  | no   | no   |
| Chow Chow                    | CHOW | 299 | n.d.  | no   | no   |
| Chow Chow                    | CHOW | 300 | n.d.  | no   | no   |
| Chow Chow                    | CHOW | 301 | n.d.  | no   | no   |
| Chow Chow                    | CHOW | 302 | n.d.  | no   | no   |
| Chow Chow                    | CHOW | 303 | n.d.  | no   | no   |
| Chow Chow                    | CHOW | 304 | n.d.  | no   | no   |
| Collie                       | COLL | 305 | long  | no   | n.d. |
| Collie                       | COLL | 306 | long  | no   | n.d. |
| Collie                       | COLL | 307 | long  | no   | n.d. |
| Collie                       | COLL | 308 | n.d.  | no   | n.d. |
| Collie                       | COLL | 309 | long  | no   | n.d. |
| Collie                       | COLL | 310 | n.d.  | no   | n.d. |
| Collie                       | COLL | 311 | n.d.  | no   | n.d. |
| Collie                       | COLL | 312 | n.d.  | no   | n.d. |
| Collie                       | COLL | 313 | n.d.  | no   | n.d. |
| Collie                       | COLL | 314 | n.d.  | no   | n.d. |
| Collie                       | COLL | 315 | n.d.  | no   | n.d. |
| Collie                       | COLL | 316 | n.d.  | no   | n.d. |
| Dachshund                    | DACH | 317 | n.d.  | n.d. | n.d. |
| Dachshund                    | DACH | 318 | short | n.d. | n.d. |
| Dachshund                    | DACH | 319 | short | n.d. | n.d. |
| Dachshund                    | DACH | 320 | short | n.d. | n.d. |
| Dachshund                    | DACH | 321 | n.d.  | n.d. | n.d. |
| Dachshund                    | DACH | 322 | n.d.  | n.d. | n.d. |

|                          |      |     |       |      |      |
|--------------------------|------|-----|-------|------|------|
| Dachshund                | DACH | 323 | long  | n.d. | n.d. |
| Dachshund                | DACH | 324 | long  | n.d. | n.d. |
| Dachshund                | DACH | 325 | n.d.  | n.d. | n.d. |
| Dachshund                | DACH | 326 | short | n.d. | n.d. |
| Dachshund                | DACH | 327 | long  | n.d. | n.d. |
| Dachshund                | DACH | 328 | long  | n.d. | n.d. |
| Doberman Pinscher        | DOBP | 329 | short | no   | n.d. |
| Doberman Pinscher        | DOBP | 330 | short | no   | n.d. |
| Doberman Pinscher        | DOBP | 331 | short | no   | n.d. |
| Doberman Pinscher        | DOBP | 332 | short | no   | n.d. |
| Doberman Pinscher        | DOBP | 333 | short | no   | n.d. |
| Doberman Pinscher        | DOBP | 334 | short | no   | n.d. |
| Doberman Pinscher        | DOBP | 335 | short | no   | n.d. |
| Doberman Pinscher        | DOBP | 336 | short | no   | n.d. |
| Doberman Pinscher        | DOBP | 337 | short | no   | n.d. |
| Doberman Pinscher        | DOBP | 338 | short | no   | n.d. |
| Doberman Pinscher        | DOBP | 339 | short | no   | n.d. |
| Doberman Pinscher        | DOBP | 340 | short | no   | n.d. |
| English Cocker Spaniel   | ECKR | 341 | long  | no   | no   |
| English Cocker Spaniel   | ECKR | 342 | long  | no   | no   |
| English Cocker Spaniel   | ECKR | 343 | long  | no   | no   |
| English Cocker Spaniel   | ECKR | 344 | long  | no   | no   |
| English Cocker Spaniel   | ECKR | 345 | long  | no   | no   |
| English Cocker Spaniel   | ECKR | 346 | long  | no   | no   |
| English Springer Spaniel | ESSP | 347 | long  | no   | no   |
| English Springer Spaniel | ESSP | 348 | long  | no   | no   |
| English Springer Spaniel | ESSP | 349 | long  | no   | no   |
| English Springer Spaniel | ESSP | 350 | long  | no   | no   |
| English Springer Spaniel | ESSP | 351 | long  | no   | no   |
| English Springer Spaniel | ESSP | 352 | long  | no   | no   |
| English Springer Spaniel | ESSP | 353 | long  | no   | no   |
| English Springer Spaniel | ESSP | 354 | long  | no   | no   |
| English Springer Spaniel | ESSP | 355 | long  | no   | no   |
| English Springer Spaniel | ESSP | 356 | long  | no   | no   |
| English Springer Spaniel | ESSP | 357 | long  | no   | no   |
| English Springer Spaniel | ESSP | 358 | long  | no   | no   |
| Flat-coated Retriever    | FCR- | 359 | long  | no   | no   |
| Flat-coated Retriever    | FCR- | 360 | long  | no   | no   |
| Flat-coated Retriever    | FCR- | 361 | long  | no   | no   |
| Flat-coated Retriever    | FCR- | 362 | long  | no   | no   |
| Flat-coated Retriever    | FCR- | 363 | long  | no   | no   |
| Flat-coated Retriever    | FCR- | 364 | long  | no   | no   |
| Flat-coated Retriever    | FCR- | 365 | long  | no   | no   |
| Flat-coated Retriever    | FCR- | 366 | long  | no   | no   |
| Flat-coated Retriever    | FCR- | 367 | long  | no   | no   |
| Flat-coated Retriever    | FCR- | 368 | long  | no   | no   |
| Flat-coated Retriever    | FCR- | 369 | long  | no   | no   |
| Flat-coated Retriever    | FCR- | 370 | long  | no   | no   |
| French Bulldog           | FBUL | 371 | short | no   | n.d. |
| French Bulldog           | FBUL | 372 | short | no   | n.d. |
| French Bulldog           | FBUL | 373 | short | no   | n.d. |
| French Bulldog           | FBUL | 374 | short | no   | n.d. |
| French Bulldog           | FBUL | 375 | short | no   | n.d. |
| French Bulldog           | FBUL | 376 | short | no   | n.d. |
| French Bulldog           | FBUL | 377 | short | no   | n.d. |



|                             |      |     |       |     |      |
|-----------------------------|------|-----|-------|-----|------|
| French Bulldog              | FBUL | 378 | short | no  | n.d. |
| French Bulldog              | FBUL | 379 | short | no  | n.d. |
| French Bulldog              | FBUL | 380 | short | no  | n.d. |
| French Bulldog              | FBUL | 381 | short | no  | n.d. |
| French Bulldog              | FBUL | 382 | short | no  | n.d. |
| German Shepherd Dog         | GSD- | 383 | n.d.  | no  | no   |
| German Shepherd Dog         | GSD- | 384 | n.d.  | no  | no   |
| German Shepherd Dog         | GSD- | 385 | n.d.  | no  | no   |
| German Shepherd Dog         | GSD- | 386 | n.d.  | no  | no   |
| German Shepherd Dog         | GSD- | 387 | n.d.  | no  | no   |
| German Shepherd Dog         | GSD- | 388 | n.d.  | no  | no   |
| German Shepherd Dog         | GSD- | 389 | n.d.  | no  | no   |
| German Shepherd Dog         | GSD- | 390 | n.d.  | no  | no   |
| German Shepherd Dog         | GSD- | 391 | n.d.  | no  | no   |
| German Shepherd Dog         | GSD- | 392 | n.d.  | no  | no   |
| German Shepherd Dog         | GSD- | 393 | n.d.  | no  | no   |
| German Shepherd Dog         | GSD- | 394 | n.d.  | no  | no   |
| German Short-haired Pointer | GSHP | 395 | short | no  | n.d. |
| German Short-haired Pointer | GSHP | 396 | short | no  | n.d. |
| German Short-haired Pointer | GSHP | 397 | short | no  | n.d. |
| German Short-haired Pointer | GSHP | 398 | short | no  | n.d. |
| German Short-haired Pointer | GSHP | 399 | short | no  | n.d. |
| German Short-haired Pointer | GSHP | 400 | short | no  | n.d. |
| German Short-haired Pointer | GSHP | 401 | short | no  | n.d. |
| German Short-haired Pointer | GSHP | 402 | short | no  | n.d. |
| German Short-haired Pointer | GSHP | 403 | short | no  | n.d. |
| German Short-haired Pointer | GSHP | 404 | short | no  | n.d. |
| German Short-haired Pointer | GSHP | 405 | short | no  | n.d. |
| Giant Schnauzer             | GSNZ | 406 | n.d.  | yes | no   |
| Giant Schnauzer             | GSNZ | 407 | n.d.  | yes | no   |
| Giant Schnauzer             | GSNZ | 408 | n.d.  | yes | no   |
| Giant Schnauzer             | GSNZ | 409 | n.d.  | yes | no   |
| Giant Schnauzer             | GSNZ | 410 | n.d.  | yes | no   |
| Giant Schnauzer             | GSNZ | 411 | n.d.  | yes | no   |
| Giant Schnauzer             | GSNZ | 412 | n.d.  | yes | no   |
| Giant Schnauzer             | GSNZ | 413 | n.d.  | yes | no   |
| Giant Schnauzer             | GSNZ | 414 | n.d.  | yes | no   |
| Giant Schnauzer             | GSNZ | 415 | n.d.  | yes | no   |
| Giant Schnauzer             | GSNZ | 416 | n.d.  | yes | no   |
| Giant Schnauzer             | GSNZ | 417 | n.d.  | yes | no   |
| Glen of Imaal Terrier       | GLEN | 418 | n.d.  | yes | no   |
| Glen of Imaal Terrier       | GLEN | 419 | n.d.  | yes | no   |
| Glen of Imaal Terrier       | GLEN | 420 | n.d.  | yes | no   |
| Glen of Imaal Terrier       | GLEN | 421 | n.d.  | yes | no   |
| Glen of Imaal Terrier       | GLEN | 422 | n.d.  | yes | no   |
| Glen of Imaal Terrier       | GLEN | 423 | n.d.  | yes | no   |
| Glen of Imaal Terrier       | GLEN | 424 | n.d.  | yes | no   |
| Glen of Imaal Terrier       | GLEN | 425 | n.d.  | yes | no   |
| Glen of Imaal Terrier       | GLEN | 426 | n.d.  | yes | no   |
| Glen of Imaal Terrier       | GLEN | 427 | n.d.  | yes | no   |
| Glen of Imaal Terrier       | GLEN | 428 | n.d.  | yes | no   |
| Glen of Imaal Terrier       | GLEN | 429 | n.d.  | yes | no   |
| Golden Retriever            | GOLD | 430 | long  | no  | no   |
| Golden Retriever            | GOLD | 431 | long  | no  | no   |
| Golden Retriever            | GOLD | 432 | long  | no  | no   |

|                  |      |     |       |     |      |
|------------------|------|-----|-------|-----|------|
| Golden Retriever | GOLD | 433 | long  | no  | no   |
| Golden Retriever | GOLD | 434 | long  | no  | no   |
| Golden Retriever | GOLD | 435 | long  | no  | no   |
| Golden Retriever | GOLD | 436 | long  | no  | no   |
| Golden Retriever | GOLD | 437 | long  | no  | no   |
| Golden Retriever | GOLD | 438 | long  | no  | no   |
| Golden Retriever | GOLD | 439 | long  | no  | no   |
| Golden Retriever | GOLD | 440 | long  | no  | no   |
| Golden Retriever | GOLD | 441 | long  | no  | no   |
| Great Dane       | DANE | 442 | short | no  | n.d. |
| Great Dane       | DANE | 443 | short | no  | n.d. |
| Great Dane       | DANE | 444 | short | no  | n.d. |
| Great Dane       | DANE | 445 | short | no  | n.d. |
| Great Dane       | DANE | 446 | short | no  | n.d. |
| Great Dane       | DANE | 447 | short | no  | n.d. |
| Great Dane       | DANE | 448 | short | no  | n.d. |
| Great Dane       | DANE | 449 | short | no  | n.d. |
| Great Dane       | DANE | 450 | short | no  | n.d. |
| Great Dane       | DANE | 451 | short | no  | n.d. |
| Great Dane       | DANE | 452 | short | no  | n.d. |
| Great Dane       | DANE | 453 | short | no  | n.d. |
| Greyhound        | GREY | 454 | short | no  | n.d. |
| Greyhound        | GREY | 455 | short | no  | n.d. |
| Greyhound        | GREY | 456 | short | no  | n.d. |
| Greyhound        | GREY | 457 | short | no  | n.d. |
| Greyhound        | GREY | 458 | short | no  | n.d. |
| Greyhound        | GREY | 459 | short | no  | n.d. |
| Greyhound        | GREY | 460 | short | no  | n.d. |
| Greyhound        | GREY | 461 | short | no  | n.d. |
| Greyhound        | GREY | 462 | short | no  | n.d. |
| Greyhound        | GREY | 463 | short | no  | n.d. |
| Greyhound        | GREY | 464 | short | no  | n.d. |
| Greyhound        | GREY | 465 | short | no  | n.d. |
| Havanese         | HAVA | 466 | long  | yes | n.d. |
| Havanese         | HAVA | 467 | long  | yes | n.d. |
| Havanese         | HAVA | 468 | long  | yes | n.d. |
| Havanese         | HAVA | 469 | long  | yes | n.d. |
| Havanese         | HAVA | 470 | long  | yes | n.d. |
| Havanese         | HAVA | 471 | long  | yes | n.d. |
| Havanese         | HAVA | 472 | long  | yes | n.d. |
| Havanese         | HAVA | 473 | long  | yes | n.d. |
| Havanese         | HAVA | 474 | long  | yes | n.d. |
| Havanese         | HAVA | 475 | long  | yes | n.d. |
| Havanese         | HAVA | 476 | long  | yes | n.d. |
| Ibizan Hound     | IBIZ | 477 | short | no  | n.d. |
| Ibizan Hound     | IBIZ | 478 | short | no  | n.d. |
| Ibizan Hound     | IBIZ | 479 | short | no  | n.d. |
| Ibizan Hound     | IBIZ | 480 | short | no  | n.d. |
| Ibizan Hound     | IBIZ | 481 | short | no  | n.d. |
| Ibizan Hound     | IBIZ | 482 | short | no  | n.d. |
| Ibizan Hound     | IBIZ | 483 | short | no  | n.d. |
| Ibizan Hound     | IBIZ | 484 | short | no  | n.d. |
| Ibizan Hound     | IBIZ | 485 | short | no  | n.d. |
| Ibizan Hound     | IBIZ | 486 | short | no  | n.d. |
| Ibizan Hound     | IBIZ | 487 | short | no  | n.d. |

|                      |      |     |       |      |      |
|----------------------|------|-----|-------|------|------|
| Ibizan Hound         | IBIZ | 488 | short | no   | n.d. |
| Irish Water Spaniel  | IWSP | 489 | long  | no   | yes  |
| Irish Water Spaniel  | IWSP | 490 | long  | no   | yes  |
| Irish Water Spaniel  | IWSP | 491 | long  | no   | yes  |
| Irish Water Spaniel  | IWSP | 492 | long  | no   | yes  |
| Irish Water Spaniel  | IWSP | 493 | long  | no   | yes  |
| Irish Water Spaniel  | IWSP | 494 | long  | no   | yes  |
| Irish Water Spaniel  | IWSP | 495 | long  | no   | yes  |
| Irish Water Spaniel  | IWSP | 496 | long  | no   | yes  |
| Irish Water Spaniel  | IWSP | 497 | long  | no   | yes  |
| Irish Water Spaniel  | IWSP | 498 | long  | no   | yes  |
| Irish Water Spaniel  | IWSP | 499 | long  | no   | yes  |
| Irish Water Spaniel  | IWSP | 500 | long  | no   | yes  |
| Irish Wolfhound      | IWOF | 501 | short | yes  | no   |
| Irish Wolfhound      | IWOF | 502 | short | yes  | no   |
| Irish Wolfhound      | IWOF | 503 | short | yes  | no   |
| Irish Wolfhound      | IWOF | 504 | short | yes  | no   |
| Irish Wolfhound      | IWOF | 505 | short | yes  | no   |
| Irish Wolfhound      | IWOF | 506 | short | yes  | no   |
| Irish Wolfhound      | IWOF | 507 | short | yes  | no   |
| Irish Wolfhound      | IWOF | 508 | short | yes  | no   |
| Irish Wolfhound      | IWOF | 509 | short | yes  | no   |
| Irish Wolfhound      | IWOF | 510 | short | yes  | no   |
| Irish Wolfhound      | IWOF | 511 | short | yes  | no   |
| Irish Wolfhound      | IWOF | 512 | short | yes  | no   |
| Irish Wolfhound      | IWOF | 513 | short | yes  | no   |
| Italian Greyhound    | ITGY | 514 | short | no   | n.d. |
| Italian Greyhound    | ITGY | 515 | short | no   | n.d. |
| Italian Greyhound    | ITGY | 516 | short | no   | n.d. |
| Italian Greyhound    | ITGY | 517 | short | no   | n.d. |
| Italian Greyhound    | ITGY | 518 | short | no   | n.d. |
| Italian Greyhound    | ITGY | 519 | short | no   | n.d. |
| Italian Greyhound    | ITGY | 520 | short | no   | n.d. |
| Italian Greyhound    | ITGY | 521 | short | no   | n.d. |
| Italian Greyhound    | ITGY | 522 | short | no   | n.d. |
| Italian Greyhound    | ITGY | 523 | short | no   | n.d. |
| Italian Greyhound    | ITGY | 524 | short | no   | n.d. |
| Italian Greyhound    | ITGY | 525 | short | no   | n.d. |
| Jack Russell Terrier | JACK | 526 | short | n.d. | n.d. |
| Jack Russell Terrier | JACK | 527 | short | n.d. | n.d. |
| Jack Russell Terrier | JACK | 528 | short | n.d. | n.d. |
| Jack Russell Terrier | JACK | 529 | short | n.d. | n.d. |
| Jack Russell Terrier | JACK | 530 | short | n.d. | n.d. |
| Jack Russell Terrier | JACK | 531 | short | n.d. | n.d. |
| Jack Russell Terrier | JACK | 532 | short | n.d. | n.d. |
| Jack Russell Terrier | JACK | 533 | short | n.d. | n.d. |
| Jack Russell Terrier | JACK | 534 | short | n.d. | n.d. |
| Jack Russell Terrier | JACK | 535 | short | n.d. | n.d. |
| Jack Russell Terrier | JACK | 536 | short | n.d. | n.d. |
| Jack Russell Terrier | JACK | 537 | short | n.d. | n.d. |
| Kuvasz               | KUVZ | 538 | n.d.  | no   | yes  |
| Kuvasz               | KUVZ | 539 | n.d.  | no   | yes  |
| Kuvasz               | KUVZ | 540 | n.d.  | no   | yes  |
| Kuvasz               | KUVZ | 541 | n.d.  | no   | yes  |
| Kuvasz               | KUVZ | 542 | n.d.  | no   | yes  |

|                        |      |     |       |    |      |
|------------------------|------|-----|-------|----|------|
| Kuvasz                 | KUVZ | 543 | n.d.  | no | yes  |
| Kuvasz                 | KUVZ | 544 | n.d.  | no | yes  |
| Kuvasz                 | KUVZ | 545 | n.d.  | no | yes  |
| Kuvasz                 | KUVZ | 546 | n.d.  | no | yes  |
| Kuvasz                 | KUVZ | 547 | n.d.  | no | yes  |
| Kuvasz                 | KUVZ | 548 | n.d.  | no | yes  |
| Kuvasz                 | KUVZ | 549 | n.d.  | no | yes  |
| Labrador Retriever     | LAB- | 550 | short | no | n.d. |
| Labrador Retriever     | LAB- | 551 | short | no | n.d. |
| Labrador Retriever     | LAB- | 552 | short | no | n.d. |
| Labrador Retriever     | LAB- | 553 | short | no | n.d. |
| Labrador Retriever     | LAB- | 554 | short | no | n.d. |
| Labrador Retriever     | LAB- | 555 | short | no | n.d. |
| Labrador Retriever     | LAB- | 556 | short | no | n.d. |
| Labrador Retriever     | LAB- | 557 | short | no | n.d. |
| Labrador Retriever     | LAB- | 558 | short | no | n.d. |
| Labrador Retriever     | LAB- | 559 | short | no | n.d. |
| Labrador Retriever     | LAB- | 560 | short | no | n.d. |
| Labrador Retriever     | LAB- | 561 | short | no | n.d. |
| Mastiff                | MAST | 562 | short | no | n.d. |
| Mastiff                | MAST | 563 | short | no | n.d. |
| Mastiff                | MAST | 564 | short | no | n.d. |
| Mastiff                | MAST | 565 | short | no | n.d. |
| Mastiff                | MAST | 566 | short | no | n.d. |
| Mastiff                | MAST | 567 | short | no | n.d. |
| Mastiff                | MAST | 568 | short | no | n.d. |
| Mastiff                | MAST | 569 | short | no | n.d. |
| Mastiff                | MAST | 570 | short | no | n.d. |
| Mastiff                | MAST | 571 | short | no | n.d. |
| Mastiff                | MAST | 572 | short | no | n.d. |
| Mastiff                | MAST | 573 | short | no | n.d. |
| Miniature Bull Terrier | MBLT | 574 | short | no | n.d. |
| Miniature Bull Terrier | MBLT | 575 | short | no | n.d. |
| Miniature Bull Terrier | MBLT | 576 | short | no | n.d. |
| Miniature Bull Terrier | MBLT | 577 | short | no | n.d. |
| Miniature Bull Terrier | MBLT | 578 | short | no | n.d. |
| Miniature Bull Terrier | MBLT | 579 | short | no | n.d. |
| Miniature Bull Terrier | MBLT | 580 | short | no | n.d. |
| Miniature Bull Terrier | MBLT | 581 | short | no | n.d. |
| Miniature Bull Terrier | MBLT | 582 | short | no | n.d. |
| Miniature Bull Terrier | MBLT | 583 | short | no | n.d. |
| Miniature Bull Terrier | MBLT | 584 | short | no | n.d. |
| Miniature Bull Terrier | MBLT | 585 | short | no | n.d. |
| Miniature Pinscher     | MPIN | 586 | short | no | n.d. |
| Miniature Pinscher     | MPIN | 587 | short | no | n.d. |
| Miniature Pinscher     | MPIN | 588 | short | no | n.d. |
| Miniature Pinscher     | MPIN | 589 | short | no | n.d. |
| Miniature Pinscher     | MPIN | 590 | short | no | n.d. |
| Miniature Pinscher     | MPIN | 591 | short | no | n.d. |
| Miniature Pinscher     | MPIN | 592 | short | no | n.d. |
| Miniature Pinscher     | MPIN | 593 | short | no | n.d. |
| Miniature Pinscher     | MPIN | 594 | short | no | n.d. |
| Miniature Pinscher     | MPIN | 595 | short | no | n.d. |
| Miniature Pinscher     | MPIN | 596 | short | no | n.d. |
| Miniature Pinscher     | MPIN | 597 | short | no | n.d. |

|                      |      |     |       |     |      |
|----------------------|------|-----|-------|-----|------|
| Newfoundland         | NEWF | 598 | long  | no  | no   |
| Newfoundland         | NEWF | 599 | long  | no  | no   |
| Newfoundland         | NEWF | 600 | long  | no  | no   |
| Newfoundland         | NEWF | 601 | long  | no  | no   |
| Newfoundland         | NEWF | 602 | long  | no  | no   |
| Newfoundland         | NEWF | 603 | long  | no  | no   |
| Newfoundland         | NEWF | 604 | long  | no  | no   |
| Newfoundland         | NEWF | 605 | long  | no  | no   |
| Newfoundland         | NEWF | 606 | long  | no  | no   |
| Newfoundland         | NEWF | 607 | long  | no  | no   |
| Newfoundland         | NEWF | 608 | long  | no  | no   |
| Newfoundland         | NEWF | 609 | long  | no  | no   |
| Norwich Terrier      | NOWT | 610 | short | yes | n.d. |
| Norwich Terrier      | NOWT | 611 | short | yes | n.d. |
| Norwich Terrier      | NOWT | 612 | short | yes | n.d. |
| Norwich Terrier      | NOWT | 613 | short | yes | n.d. |
| Norwich Terrier      | NOWT | 614 | short | yes | n.d. |
| Norwich Terrier      | NOWT | 615 | short | yes | n.d. |
| Norwich Terrier      | NOWT | 616 | short | yes | n.d. |
| Norwich Terrier      | NOWT | 617 | short | yes | n.d. |
| Norwich Terrier      | NOWT | 618 | short | yes | n.d. |
| Norwich Terrier      | NOWT | 619 | short | yes | n.d. |
| Old English Sheepdog | OES- | 620 | long  | yes | no   |
| Old English Sheepdog | OES- | 621 | long  | yes | no   |
| Old English Sheepdog | OES- | 622 | long  | yes | no   |
| Old English Sheepdog | OES- | 623 | long  | yes | no   |
| Old English Sheepdog | OES- | 624 | long  | yes | no   |
| Old English Sheepdog | OES- | 625 | long  | yes | no   |
| Old English Sheepdog | OES- | 626 | long  | yes | no   |
| Old English Sheepdog | OES- | 627 | long  | yes | no   |
| Old English Sheepdog | OES- | 628 | long  | yes | no   |
| Old English Sheepdog | OES- | 629 | long  | yes | no   |
| Old English Sheepdog | OES- | 630 | long  | yes | no   |
| Old English Sheepdog | OES- | 631 | long  | yes | no   |
| Papillon             | PAPI | 632 | long  | no  | no   |
| Papillon             | PAPI | 633 | long  | no  | no   |
| Papillon             | PAPI | 634 | long  | no  | no   |
| Papillon             | PAPI | 635 | long  | no  | no   |
| Papillon             | PAPI | 636 | long  | no  | no   |
| Papillon             | PAPI | 637 | long  | no  | no   |
| Papillon             | PAPI | 638 | long  | no  | no   |
| Papillon             | PAPI | 639 | long  | no  | no   |
| Papillon             | PAPI | 640 | long  | no  | no   |
| Papillon             | PAPI | 641 | long  | no  | no   |
| Papillon             | PAPI | 642 | long  | no  | no   |
| Papillon             | PAPI | 643 | long  | no  | no   |
| Pekingese            | PEKE | 644 | long  | no  | no   |
| Pekingese            | PEKE | 645 | long  | no  | no   |
| Pekingese            | PEKE | 646 | long  | no  | no   |
| Pekingese            | PEKE | 647 | long  | no  | no   |
| Pekingese            | PEKE | 648 | long  | no  | no   |
| Pekingese            | PEKE | 649 | long  | no  | no   |
| Pekingese            | PEKE | 650 | long  | no  | no   |
| Pekingese            | PEKE | 651 | long  | no  | no   |
| Pekingese            | PEKE | 652 | long  | no  | no   |

|                              |      |     |       |     |      |
|------------------------------|------|-----|-------|-----|------|
| Pekingese                    | PEKE | 653 | long  | no  | no   |
| Pekingese                    | PEKE | 654 | long  | no  | no   |
| Pekingese                    | PEKE | 655 | long  | no  | no   |
| Pembroke Welsh Corgi         | PEMB | 656 | n.d.  | no  | no   |
| Pembroke Welsh Corgi         | PEMB | 657 | n.d.  | no  | no   |
| Pembroke Welsh Corgi         | PEMB | 658 | n.d.  | no  | no   |
| Pembroke Welsh Corgi         | PEMB | 659 | n.d.  | no  | no   |
| Pembroke Welsh Corgi         | PEMB | 660 | n.d.  | no  | no   |
| Pembroke Welsh Corgi         | PEMB | 661 | n.d.  | no  | no   |
| Pembroke Welsh Corgi         | PEMB | 662 | n.d.  | no  | no   |
| Pembroke Welsh Corgi         | PEMB | 663 | n.d.  | no  | no   |
| Pembroke Welsh Corgi         | PEMB | 664 | n.d.  | no  | no   |
| Pembroke Welsh Corgi         | PEMB | 665 | n.d.  | no  | no   |
| Pembroke Welsh Corgi         | PEMB | 666 | n.d.  | no  | no   |
| Pembroke Welsh Corgi         | PEMB | 667 | n.d.  | no  | no   |
| Petit Basset Griffon Vendéen | PBGV | 668 | short | yes | no   |
| Petit Basset Griffon Vendéen | PBGV | 669 | short | yes | no   |
| Petit Basset Griffon Vendéen | PBGV | 670 | short | yes | no   |
| Petit Basset Griffon Vendéen | PBGV | 671 | short | yes | no   |
| Petit Basset Griffon Vendéen | PBGV | 672 | short | yes | no   |
| Petit Basset Griffon Vendéen | PBGV | 673 | short | yes | no   |
| Petit Basset Griffon Vendéen | PBGV | 674 | short | yes | no   |
| Petit Basset Griffon Vendéen | PBGV | 675 | short | yes | no   |
| Petit Basset Griffon Vendéen | PBGV | 676 | short | yes | no   |
| Petit Basset Griffon Vendéen | PBGV | 677 | short | yes | no   |
| Petit Basset Griffon Vendéen | PBGV | 678 | short | yes | no   |
| Petit Basset Griffon Vendéen | PBGV | 679 | short | yes | no   |
| Pomeranian                   | POM- | 680 | long  | no  | no   |
| Pomeranian                   | POM- | 681 | long  | no  | no   |
| Pomeranian                   | POM- | 682 | long  | no  | no   |
| Pomeranian                   | POM- | 683 | long  | no  | no   |
| Pomeranian                   | POM- | 684 | long  | no  | no   |
| Pomeranian                   | POM- | 685 | long  | no  | no   |
| Pomeranian                   | POM- | 686 | long  | no  | no   |
| Pomeranian                   | POM- | 687 | long  | no  | no   |
| Pomeranian                   | POM- | 688 | long  | no  | no   |
| Pomeranian                   | POM- | 689 | long  | no  | no   |
| Pomeranian                   | POM- | 690 | long  | no  | no   |
| Pomeranian                   | POM- | 691 | long  | no  | no   |
| Portuguese Water Dog         | PTWD | 692 | long  | yes | yes  |
| Portuguese Water Dog         | PTWD | 693 | long  | yes | yes  |
| Portuguese Water Dog         | PTWD | 694 | long  | yes | yes  |
| Portuguese Water Dog         | PTWD | 695 | long  | yes | yes  |
| Portuguese Water Dog         | PTWD | 696 | long  | yes | yes  |
| Portuguese Water Dog         | PTWD | 697 | long  | yes | yes  |
| Portuguese Water Dog         | PTWD | 698 | long  | yes | yes  |
| Portuguese Water Dog         | PTWD | 699 | long  | yes | yes  |
| Portuguese Water Dog         | PTWD | 700 | long  | yes | yes  |
| Portuguese Water Dog         | PTWD | 701 | long  | yes | yes  |
| Portuguese Water Dog         | PTWD | 702 | long  | yes | yes  |
| Portuguese Water Dog         | PTWD | 703 | long  | yes | yes  |
| Pug                          | PUG  | 704 | short | no  | n.d. |
| Pug                          | PUG  | 705 | short | no  | n.d. |
| Pug                          | PUG  | 706 | short | no  | n.d. |
| Pug                          | PUG  | 707 | short | no  | n.d. |

|                    |      |     |       |     |      |
|--------------------|------|-----|-------|-----|------|
| Pug                | PUG  | 708 | short | no  | n.d. |
| Pug                | PUG  | 709 | short | no  | n.d. |
| Pug                | PUG  | 710 | short | no  | n.d. |
| Pug                | PUG  | 711 | short | no  | n.d. |
| Pug                | PUG  | 712 | short | no  | n.d. |
| Pug                | PUG  | 713 | short | no  | n.d. |
| Pug                | PUG  | 714 | short | no  | n.d. |
| Pug                | PUG  | 715 | short | no  | n.d. |
| Rottweiler         | ROTT | 716 | short | no  | n.d. |
| Rottweiler         | ROTT | 717 | short | no  | n.d. |
| Rottweiler         | ROTT | 718 | short | no  | n.d. |
| Rottweiler         | ROTT | 719 | short | no  | n.d. |
| Rottweiler         | ROTT | 720 | short | no  | n.d. |
| Rottweiler         | ROTT | 721 | short | no  | n.d. |
| Rottweiler         | ROTT | 722 | short | no  | n.d. |
| Rottweiler         | ROTT | 723 | short | no  | n.d. |
| Rottweiler         | ROTT | 724 | short | no  | n.d. |
| Rottweiler         | ROTT | 725 | short | no  | n.d. |
| Rottweiler         | ROTT | 726 | short | no  | n.d. |
| Rottweiler         | ROTT | 727 | short | no  | n.d. |
| Saint Bernard      | STBD | 728 | n.d.  | no  | n.d. |
| Saint Bernard      | STBD | 729 | n.d.  | no  | n.d. |
| Saint Bernard      | STBD | 730 | n.d.  | no  | n.d. |
| Saint Bernard      | STBD | 731 | n.d.  | no  | n.d. |
| Saint Bernard      | STBD | 732 | n.d.  | no  | n.d. |
| Saint Bernard      | STBD | 733 | n.d.  | no  | n.d. |
| Saint Bernard      | STBD | 734 | n.d.  | no  | n.d. |
| Saint Bernard      | STBD | 735 | n.d.  | no  | n.d. |
| Saint Bernard      | STBD | 736 | n.d.  | no  | n.d. |
| Saint Bernard      | STBD | 737 | n.d.  | no  | n.d. |
| Saint Bernard      | STBD | 738 | n.d.  | no  | n.d. |
| Saint Bernard      | STBD | 739 | n.d.  | no  | n.d. |
| Saluki             | SALU | 740 | n.d.  | no  | n.d. |
| Saluki             | SALU | 741 | n.d.  | no  | n.d. |
| Saluki             | SALU | 742 | n.d.  | no  | n.d. |
| Saluki             | SALU | 743 | n.d.  | no  | n.d. |
| Saluki             | SALU | 744 | n.d.  | no  | n.d. |
| Saluki             | SALU | 745 | n.d.  | no  | n.d. |
| Saluki             | SALU | 746 | n.d.  | no  | n.d. |
| Saluki             | SALU | 747 | n.d.  | no  | n.d. |
| Saluki             | SALU | 748 | n.d.  | no  | n.d. |
| Saluki             | SALU | 749 | n.d.  | no  | n.d. |
| Saluki             | SALU | 750 | n.d.  | no  | n.d. |
| Saluki             | SALU | 751 | n.d.  | no  | n.d. |
| Samoyed            | SAMO | 752 | long  | no  | no   |
| Samoyed            | SAMO | 753 | long  | no  | no   |
| Samoyed            | SAMO | 754 | long  | no  | no   |
| Samoyed            | SAMO | 755 | long  | no  | no   |
| Samoyed            | SAMO | 756 | long  | no  | no   |
| Samoyed            | SAMO | 757 | long  | no  | no   |
| Scottish Deerhound | DEER | 758 | short | yes | no   |
| Scottish Deerhound | DEER | 759 | short | yes | no   |
| Scottish Deerhound | DEER | 760 | short | yes | no   |
| Scottish Deerhound | DEER | 761 | short | yes | no   |
| Scottish Deerhound | DEER | 762 | short | yes | no   |

|                    |      |     |       |     |    |
|--------------------|------|-----|-------|-----|----|
| Scottish Deerhound | DEER | 763 | short | yes | no |
| Scottish Deerhound | DEER | 764 | short | yes | no |
| Scottish Deerhound | DEER | 765 | short | yes | no |
| Scottish Deerhound | DEER | 766 | short | yes | no |
| Scottish Deerhound | DEER | 767 | short | yes | no |
| Scottish Deerhound | DEER | 768 | short | yes | no |
| Scottish Deerhound | DEER | 769 | short | yes | no |
| Scottish Terrier   | SCOT | 770 | n.d.  | yes | no |
| Scottish Terrier   | SCOT | 771 | n.d.  | yes | no |
| Scottish Terrier   | SCOT | 772 | n.d.  | yes | no |
| Scottish Terrier   | SCOT | 773 | n.d.  | yes | no |
| Scottish Terrier   | SCOT | 774 | n.d.  | yes | no |
| Scottish Terrier   | SCOT | 775 | n.d.  | yes | no |
| Scottish Terrier   | SCOT | 776 | n.d.  | yes | no |
| Scottish Terrier   | SCOT | 777 | n.d.  | yes | no |
| Scottish Terrier   | SCOT | 778 | n.d.  | yes | no |
| Scottish Terrier   | SCOT | 779 | n.d.  | yes | no |
| Scottish Terrier   | SCOT | 780 | n.d.  | yes | no |
| Scottish Terrier   | SCOT | 781 | n.d.  | yes | no |
| Shetland Sheepdog  | SSHP | 782 | long  | no  | no |
| Shetland Sheepdog  | SSHP | 783 | long  | no  | no |
| Shetland Sheepdog  | SSHP | 784 | long  | no  | no |
| Shetland Sheepdog  | SSHP | 785 | long  | no  | no |
| Shetland Sheepdog  | SSHP | 786 | long  | no  | no |
| Shetland Sheepdog  | SSHP | 787 | long  | no  | no |
| Shetland Sheepdog  | SSHP | 788 | long  | no  | no |
| Shetland Sheepdog  | SSHP | 789 | long  | no  | no |
| Shetland Sheepdog  | SSHP | 790 | long  | no  | no |
| Shetland Sheepdog  | SSHP | 791 | long  | no  | no |
| Shetland Sheepdog  | SSHP | 792 | long  | no  | no |
| Shetland Sheepdog  | SSHP | 793 | long  | no  | no |
| Shih Tzu           | SHIH | 794 | long  | yes | no |
| Shih Tzu           | SHIH | 795 | long  | yes | no |
| Shih Tzu           | SHIH | 796 | long  | yes | no |
| Shih Tzu           | SHIH | 797 | long  | yes | no |
| Shih Tzu           | SHIH | 798 | long  | yes | no |
| Shih Tzu           | SHIH | 799 | long  | yes | no |
| Shih Tzu           | SHIH | 800 | long  | yes | no |
| Shih Tzu           | SHIH | 801 | long  | yes | no |
| Shih Tzu           | SHIH | 802 | long  | yes | no |
| Shih Tzu           | SHIH | 803 | long  | yes | no |
| Shih Tzu           | SHIH | 804 | long  | yes | no |
| Shih Tzu           | SHIH | 805 | long  | yes | no |
| Siberian Husky     | HUSK | 806 | n.d.  | no  | no |
| Siberian Husky     | HUSK | 807 | n.d.  | no  | no |
| Siberian Husky     | HUSK | 808 | n.d.  | no  | no |
| Siberian Husky     | HUSK | 809 | n.d.  | no  | no |
| Siberian Husky     | HUSK | 810 | n.d.  | no  | no |
| Siberian Husky     | HUSK | 811 | n.d.  | no  | no |
| Siberian Husky     | HUSK | 812 | n.d.  | no  | no |
| Siberian Husky     | HUSK | 813 | n.d.  | no  | no |
| Siberian Husky     | HUSK | 814 | n.d.  | no  | no |
| Siberian Husky     | HUSK | 815 | n.d.  | no  | no |
| Siberian Husky     | HUSK | 816 | n.d.  | no  | no |
| Siberian Husky     | HUSK | 817 | n.d.  | no  | no |



|                             |      |     |       |     |      |
|-----------------------------|------|-----|-------|-----|------|
| Staffordshire Bull Terrier  | STAF | 818 | short | no  | n.d. |
| Staffordshire Bull Terrier  | STAF | 819 | short | no  | n.d. |
| Staffordshire Bull Terrier  | STAF | 820 | short | no  | n.d. |
| Staffordshire Bull Terrier  | STAF | 821 | short | no  | n.d. |
| Staffordshire Bull Terrier  | STAF | 822 | short | no  | n.d. |
| Staffordshire Bull Terrier  | STAF | 823 | short | no  | n.d. |
| Staffordshire Bull Terrier  | STAF | 824 | short | no  | n.d. |
| Staffordshire Bull Terrier  | STAF | 825 | short | no  | n.d. |
| Staffordshire Bull Terrier  | STAF | 826 | short | no  | n.d. |
| Staffordshire Bull Terrier  | STAF | 827 | short | no  | n.d. |
| Staffordshire Bull Terrier  | STAF | 828 | short | no  | n.d. |
| Staffordshire Bull Terrier  | STAF | 829 | short | no  | n.d. |
| Standard Poodle             | SPOO | 830 | long  | yes | yes  |
| Standard Poodle             | SPOO | 831 | long  | yes | yes  |
| Standard Poodle             | SPOO | 832 | long  | yes | yes  |
| Standard Poodle             | SPOO | 833 | long  | yes | yes  |
| Standard Poodle             | SPOO | 834 | long  | yes | yes  |
| Standard Poodle             | SPOO | 835 | long  | yes | yes  |
| Standard Poodle             | SPOO | 836 | long  | yes | yes  |
| Standard Poodle             | SPOO | 837 | long  | yes | yes  |
| Standard Poodle             | SPOO | 838 | long  | yes | yes  |
| Standard Poodle             | SPOO | 839 | long  | yes | yes  |
| Standard Poodle             | SPOO | 840 | long  | yes | yes  |
| Standard Poodle             | SPOO | 841 | long  | yes | yes  |
| Standard Poodle             | SPOO | 842 | long  | yes | yes  |
| Standard Schnauzer          | SSNZ | 843 | n.d.  | yes | n.d. |
| Standard Schnauzer          | SSNZ | 844 | n.d.  | yes | n.d. |
| Standard Schnauzer          | SSNZ | 845 | n.d.  | yes | n.d. |
| Standard Schnauzer          | SSNZ | 846 | n.d.  | yes | n.d. |
| Standard Schnauzer          | SSNZ | 847 | n.d.  | yes | n.d. |
| Standard Schnauzer          | SSNZ | 848 | n.d.  | yes | n.d. |
| Standard Schnauzer          | SSNZ | 849 | n.d.  | yes | n.d. |
| Standard Schnauzer          | SSNZ | 850 | n.d.  | yes | n.d. |
| Standard Schnauzer          | SSNZ | 851 | n.d.  | yes | n.d. |
| Standard Schnauzer          | SSNZ | 852 | n.d.  | yes | n.d. |
| Standard Schnauzer          | SSNZ | 853 | n.d.  | yes | n.d. |
| Standard Schnauzer          | SSNZ | 854 | n.d.  | yes | n.d. |
| Sussex Spaniel              | SUSX | 855 | long  | no  | no   |
| Sussex Spaniel              | SUSX | 856 | long  | no  | no   |
| Sussex Spaniel              | SUSX | 857 | long  | no  | no   |
| Sussex Spaniel              | SUSX | 858 | long  | no  | no   |
| Sussex Spaniel              | SUSX | 859 | long  | no  | no   |
| Toy Poodle                  | TPOO | 860 | long  | yes | yes  |
| Toy Poodle                  | TPOO | 861 | long  | yes | yes  |
| Toy Poodle                  | TPOO | 862 | long  | yes | yes  |
| Toy Poodle                  | TPOO | 863 | long  | yes | yes  |
| Toy Poodle                  | TPOO | 864 | long  | yes | yes  |
| Toy Poodle                  | TPOO | 865 | long  | yes | yes  |
| Toy Poodle                  | TPOO | 866 | long  | yes | yes  |
| Toy Poodle                  | TPOO | 867 | long  | yes | yes  |
| Toy Poodle                  | TPOO | 868 | long  | yes | yes  |
| Toy Poodle                  | TPOO | 869 | long  | yes | yes  |
| Toy Poodle                  | TPOO | 870 | long  | yes | yes  |
| Toy Poodle                  | TPOO | 871 | long  | yes | yes  |
| West Highland White Terrier | WHWT | 872 | n.d.  | yes | no   |

|                             |      |     |       |     |      |
|-----------------------------|------|-----|-------|-----|------|
| West Highland White Terrier | WHWT | 873 | n.d.  | yes | no   |
| West Highland White Terrier | WHWT | 874 | n.d.  | yes | no   |
| West Highland White Terrier | WHWT | 875 | n.d.  | yes | no   |
| West Highland White Terrier | WHWT | 876 | n.d.  | yes | no   |
| West Highland White Terrier | WHWT | 877 | n.d.  | yes | no   |
| West Highland White Terrier | WHWT | 878 | n.d.  | yes | no   |
| West Highland White Terrier | WHWT | 879 | n.d.  | yes | no   |
| West Highland White Terrier | WHWT | 880 | n.d.  | yes | no   |
| West Highland White Terrier | WHWT | 881 | n.d.  | yes | no   |
| West Highland White Terrier | WHWT | 882 | n.d.  | yes | no   |
| West Highland White Terrier | WHWT | 883 | n.d.  | yes | no   |
| Whippet                     | WHIP | 884 | short | no  | n.d. |
| Whippet                     | WHIP | 885 | short | no  | n.d. |
| Whippet                     | WHIP | 886 | short | no  | n.d. |
| Whippet                     | WHIP | 887 | short | no  | n.d. |
| Whippet                     | WHIP | 888 | short | no  | n.d. |
| Whippet                     | WHIP | 889 | short | no  | n.d. |
| Whippet                     | WHIP | 890 | short | no  | n.d. |
| Whippet                     | WHIP | 891 | short | no  | n.d. |
| Whippet                     | WHIP | 892 | short | no  | n.d. |
| Whippet                     | WHIP | 893 | short | no  | n.d. |
| Whippet                     | WHIP | 894 | short | no  | n.d. |
| Whippet                     | WHIP | 895 | short | no  | n.d. |
| Yorkshire Terrier           | YORK | 896 | long  | yes | no   |
| Yorkshire Terrier           | YORK | 897 | long  | yes | no   |
| Yorkshire Terrier           | YORK | 898 | long  | yes | no   |
| Yorkshire Terrier           | YORK | 899 | long  | yes | no   |
| Yorkshire Terrier           | YORK | 900 | long  | yes | no   |
| Yorkshire Terrier           | YORK | 901 | long  | yes | no   |
| Yorkshire Terrier           | YORK | 902 | long  | yes | no   |
| Yorkshire Terrier           | YORK | 903 | long  | yes | no   |

n.d. = not determined

Table S3. Positions of 88 SNPs displayed in Figure S1 and their genotypes in 354 dogs including 177 furnished (cases) and 176 not furnished (control) dogs. Single marker chi-squared association values calculated using PLINK are listed in the last two columns of the table.

| SNP Name                      | Position | Allele A | Allele B | P           | -log(pValue) |
|-------------------------------|----------|----------|----------|-------------|--------------|
| BICF2G630604415_0_13_10184498 | 10184498 | G        | A        | 0.0002251   | 3.647624505  |
| BICF2G630604421_0_13_10210339 | 10210339 | C        | G        | 0.006795    | 2.167810539  |
| BICF2G630604446_0_13_10271463 | 10271463 | A        | G        | 0.0000245   | 4.611188587  |
| BICF2P516222_0_13_10319767    | 10319767 | G        | A        | 8.06E-28    | 27.09393446  |
| BICF2G630604569_0_13_10370797 | 10370797 | T        | C        | 2.71E-28    | 27.56719099  |
| BICF2P444295_0_13_10418295    | 10418295 | G        | A        | 0.1449      | 0.838931615  |
| BICF2G630604713_0_13_10472259 | 10472259 | C        | T        | 1.54E-32    | 31.81360878  |
| BICF2G630604732_0_13_10529932 | 10529932 | T        | G        | 3.82E-19    | 18.41805034  |
| BICF2P583203_0_13_10584164    | 10584164 | G        | A        | 3.82E-19    | 18.41805034  |
| BICF2S23741099_0_13_10825211  | 10825211 | C        | A        | 5.76E-10    | 9.239276028  |
| BICF2G630604851_0_13_10877143 | 10877143 | T        | C        | 0.000000587 | 6.23128792   |
| BICF2S22915896_0_13_10934049  | 10934049 | C        | T        | 4.09E-12    | 11.38848911  |
| BICF2P927359_0_13_10987746    | 10987746 | G        | A        | 0.00000123  | 5.910094889  |
| BICF2G630604960_0_13_11047731 | 11047731 | T        | C        | 6.72E-20    | 19.17295398  |
| BICF2P1055154_0_13_11095120   | 11095120 | T        | C        | 2.74E-73    | 72.56288391  |
| BICF2P419989_0_13_11188617    | 11188617 | C        | T        | 6.18E-46    | 45.2090818   |
| BICF2S23143988_0_13_11239983  | 11239983 | T        | A        | 0.001757    | 2.755228239  |
| BICF2P608842_0_13_11290414    | 11290414 | A        | T        | 1.17E-53    | 52.93107239  |
| BICF2S23121702_0_13_11385898  | 11385898 | T        | C        | 3.28E-57    | 56.48465611  |
| BICF2P1371290_0_13_11425908   | 11425908 | A        | G        | 3.83E-77    | 76.41680123  |
| BICF2P988970_0_13_11436404    | 11436404 | A        | G        | 2.22E-56    | 55.65403846  |
| BICF2P1402544_0_13_11446935   | 11446935 | G        | T        | 2.53E-56    | 55.59636481  |
| BICF2G630605108_0_13_11466809 | 11466809 | C        | T        | 2.75E-20    | 19.56082526  |
| BICF2G630605112_0_13_11473971 | 11473971 | A        | G        | 0.0000201   | 4.697669071  |
| BICF2G630605124_0_13_11489529 | 11489529 | A        | C        | 0.0000012   | 5.920456993  |
| BICF2G630605143_0_13_11509194 | 11509194 | A        | G        | 4.17E-14    | 13.37944756  |
| BICF2P1280802_0_13_11519570   | 11519570 | C        | A        | 1.6E-54     | 53.79642323  |
| BICF2P1045468_0_13_11540956   | 11540956 | G        | A        | 7.91E-49    | 48.10160395  |
| BICF2G630605204_0_13_11550445 | 11550445 | C        | G        | 7.57E-21    | 20.12096149  |
| BICF2G630605224_0_13_11560727 | 11560727 | T        | C        | 2.83E-21    | 20.54867419  |
| BICF2G630605234_0_13_11570084 | 11570084 | T        | C        | 1.97E-22    | 21.70487291  |
| BICF2S23055611_0_13_11582228  | 11582228 | A        | C        | 6.4E-55     | 54.19395576  |
| BICF2G630605270_0_13_11593074 | 11593074 | T        | G        | 1.03E-23    | 22.98547946  |
| BICF2P132342_0_13_11594577    | 11594577 | A        | G        | 1.45E-90    | 89.83983171  |
| BICF2S2363741_0_13_11601025   | 11601025 | G        | T        | 7.78E-40    | 39.10924375  |
| BICF2G630605286_0_13_11603410 | 11603410 | C        | T        | 5.83E-79    | 78.23403358  |
| BICF2G630605291_0_13_11606035 | 11606035 | G        | A        | 1.07E-21    | 20.96899572  |
| BICF2G630605295_0_13_11607365 | 11607365 | A        | T        | 1.64E-22    | 21.7862167   |
| BICF2G630605297_0_13_11610207 | 11610207 | A        | G        | 1.73E-19    | 18.76120144  |
| BICF2G630605298_0_13_11612397 | 11612397 | G        | A        | 1.28E-19    | 18.89448982  |
| BICF2S23527822_0_13_11616021  | 11616021 | G        | T        | 3.61E-15    | 14.4424928   |
| BICF2G630605308_0_13_11627783 | 11627783 | T        | C        | 1.25E-91    | 90.90170246  |
| BICF2P356700_0_13_11631883    | 11631883 | T        | C        | 7.83E-54    | 53.10634918  |
| BICF2G630605315_0_13_11639136 | 11639136 | A        | G        | 1.84E-35    | 34.73589084  |
| BICF2G630605316_0_13_11642032 | 11642032 | A        | C        | 9.31E-17    | 16.0309104   |
| BICF2G630605319_0_13_11643744 | 11643744 | A        | G        | 5.41E-38    | 37.2672043   |
| BICF2P49670_0_13_11651644     | 11651644 | T        | C        | 6.78E-66    | 65.16851416  |
| BICF2G630605333_0_13_11655718 | 11655718 | C        | T        | 1.03E-26    | 25.98842956  |
| BICF2G630605338_0_13_11657091 | 11657091 | G        | T        | 1.72E-19    | 18.76346274  |
| BICF2G630605339_0_13_11659792 | 11659792 | C        | T        | 4.42E-103   | 102.354676   |
| BICF2P1204105_0_13_11676852   | 11676852 | A        | G        | 2.15E-115   | 114.6683703  |

|                               |          |   |   |           |             |
|-------------------------------|----------|---|---|-----------|-------------|
| BICF2P112526_0_13_11678731    | 11678731 | T | C | 1.34E-106 | 105.8722475 |
| BICF2G630605343_0_13_11692587 | 11692587 | G | A | 8.63E-20  | 19.06403953 |
| BICF2G630605344_0_13_11695899 | 11695899 | C | A | 8.24E-20  | 19.08428366 |
| BICF2G630605346_0_13_11704806 | 11704806 | A | G | 0.0000473 | 4.325138859 |
| BICF2P346044_0_13_11718198    | 11718198 | C | T | 3.04E-18  | 17.51755521 |
| BICF2P182472_0_13_11728003    | 11728003 | T | C | 2.84E-21  | 20.54622314 |
| BICF2P1265004_0_13_11734027   | 11734027 | T | G | 3.07E-87  | 86.51229614 |
| BICF2G630605353_0_13_11739013 | 11739013 | C | T | 7.31E-23  | 22.13626089 |
| BICF2G630605356_0_13_11777117 | 11777117 | C | T | 6.66E-51  | 50.17659099 |
| BICF2G630605357_0_13_11790465 | 11790465 | G | C | 9.07E-34  | 33.04248849 |
| BICF2G630605358_0_13_11794326 | 11794326 | T | C | 3.7E-47   | 46.43238556 |
| BICF2G630605361_0_13_11804719 | 11804719 | G | A | 0.3924    | 0.406271001 |
| BICF2G630605369_0_13_11811625 | 11811625 | C | T | 1.24E-12  | 11.90517962 |
| BICF2G630605370_0_13_11818138 | 11818138 | A | G | 2.09E-10  | 9.68006156  |
| BICF2G630605371_0_13_11827722 | 11827722 | C | G | 1.06E-23  | 22.97633608 |
| BICF2G630605383_0_13_11837508 | 11837508 | C | G | 5.93E-12  | 11.22731165 |
| BICF2S23654432_0_13_11885247  | 11885247 | A | C | 5.91E-30  | 29.22826557 |
| BICF2G630605405_0_13_11920014 | 11920014 | G | A | 0.000041  | 4.387110231 |
| BICF2G630605438_0_13_11989716 | 11989716 | G | C | 2.63E-15  | 14.58004425 |
| BICF2G630605447_0_13_12005781 | 12005781 | C | G | 3.52E-13  | 12.45308736 |
| BICF2G630605453_0_13_12034912 | 12034912 | G | A | 3.15E-17  | 16.50182734 |
| BICF2G630605475_0_13_12059723 | 12059723 | A | G | 1.98E-11  | 10.70399333 |
| BICF2G630605500_0_13_12086712 | 12086712 | T | G | 1.64E-09  | 8.785156152 |
| BICF2P343968_0_13_12116115    | 12116115 | T | C | 2.29E-78  | 77.64016452 |
| BICF2G630605532_0_13_12161770 | 12161770 | A | G | 1.36E-09  | 8.866780543 |
| BICF2P1107565_0_13_12216540   | 12216540 | C | T | 8.61E-71  | 70.06509774 |
| BICF2P435808_0_13_12260184    | 12260184 | A | G | 1.6E-67   | 66.79533749 |
| BICF2P1307230_0_13_12285257   | 12285257 | T | A | 5.83E-77  | 76.23455498 |
| BICF2S23246595_0_13_12311382  | 12311382 | C | T | 0.6975    | 0.156455788 |
| BICF2P290626_0_13_12337980    | 12337980 | A | T | 2.3E-72   | 71.638839   |
| BICF2P1228772_0_13_12385331   | 12385331 | C | G | 1.33E-71  | 70.87712908 |
| BICF2P766060_0_13_12418144    | 12418144 | A | G | 8.91E-19  | 18.05036608 |
| BICF2S24116507_0_13_12493666  | 12493666 | G | T | 4.13E-25  | 24.38373459 |
| BICF2P928407_0_13_12517909    | 12517909 | G | A | 7.11E-27  | 26.14831368 |
| BICF2S22957965_0_13_12547841  | 12547841 | G | T | 6.66E-12  | 11.17665621 |
| BICF2G630605730_0_13_12572947 | 12572947 | C | G | 6.59E-22  | 21.18137827 |
| BICF2S2373535_0_13_12586193   | 12586193 | A | G | 8.61E-09  | 8.064845553 |

Table S4. Primers sequences and genomic positions for amplicons used in SNP discovery at all three loci.

| chr | start    | product size | primer name* | forward primer                      | reverse primer                    |
|-----|----------|--------------|--------------|-------------------------------------|-----------------------------------|
| 13  | 11627595 | 830          | SQ7056       | ATGAGTCAGCCATCGGTGTT                | GGAAAAGTGTCCAGGGAGAA              |
| 13  | 11633956 | 694          | SQ7057       | TCAAGAAGAGAGGCAATAACAGG             | TGCTTCATCGTTAAAAAGTCAG            |
| 13  | 11634548 | 676          | SQ7058       | TGGCTAAAGAAAACCTCCACAA              | AAATTACCATCATGAGACCATGC           |
| 13  | 11634594 | 210          | SQ7242       | GCATGAAAAGATCATCTCAGAAAC            | ATTATGAGAATACTATTGCTATGAGATAAGAAG |
| 13  | 11634735 | 152          | SQ7240       | GCAAATCCTAAAGTAGTATACAACATTCATATATG | ATTGGCAAAACTACCTCTCCAC            |
| 13  | 11634745 | 150          | SQ7241       | AAGTAGTATACAACATTCATATATGGCTTC      | CACCTTGCATTGGCAAAACTAC            |
| 13  | 11635126 | 599          | SQ7059       | TTGGCTCCAAGAAGACCTGT                | TGTGTAACAAGTCATCCCCAAT            |
| 13  | 11635608 | 821          | SQ7060       | ATGTCAAGGGGCAACAAAAC                | TTCCCCCATTGTAGGAAAGA              |
| 13  | 11636338 | 804          | SQ7061       | TTGCTCCTGGGCTCTTTCTA                | GATGGTGAAGCAAAGAGGA               |
| 13  | 11637060 | 777          | SQ7062       | CCTGAAGACCTGGCAATAGG                | TCTGCAAATGCTTGTTAACTGTC           |
| 13  | 11637772 | 784          | SQ7063       | TTTGTTTGGGATGGAAAACC                | AAACCCGAGGACCATTGAT               |
| 13  | 11645671 | 597          | SQ7064       | TCAGGTCTAGCCTGGAGAGG                | GGACTGGTTGGGAAGATTGA              |
| 13  | 11646158 | 593          | SQ7065       | GTGCCCAGCAAAATGTCTTT                | TGCTCTCACATCCTCTTCCA              |
| 13  | 11657328 | 585          | SQ7066       | GCAGTCCAGGAAATCTCACAG               | TCCATGGTAGGAACTCACCAC             |
| 13  | 11657840 | 494          | SQ7067       | ACGGAAGTGGGAGAAATGC                 | ACCTCTGTGGCTTGGCTCT               |
| 13  | 11658294 | 692          | SQ7068       | CCGCATGGAACGATCTAACT                | GTTTGAAGTGGCCTTCAGC               |
| 13  | 11658907 | 843          | SQ7069       | GCAGATATATGGGTTTAGCTTTGC            | ATCCATGCTGCTCCAGAAAT              |
| 13  | 11659741 | 886          | SQ7070       | AGCATGGATCCTGCAACTTT                | CGGACTTTGGGTATCTTGA               |
| 13  | 11660312 | 595          | SQ7071       | TCAGGCTGGAACATAATGC                 | TTAAATTTTCGGCCAACCTGC             |
| 13  | 11660835 | 788          | SQ7072       | TTGCAGAAGTCCAATTACACAAA             | CCCAGCCCTGATTTTCTAT               |
| 13  | 11661156 | 300          | SQ7073       | GCTCTACACTCAGCAGGAAGTC              | CATCCCAAACCTCCTCTCTTCTT           |
| 13  | 11661488 | 820          | SQ7074       | GTGATGCCAGCCTCTGAAAT                | TTCTTTGGCCAATGCTTTTC              |
| 13  | 11662225 | 682          | SQ7075       | TCCATACACATGTTGGTCCTG               | GCTTATGATAGGCAGAGTGCAT            |
| 13  | 11665512 | 681          | SQ7076       | GGCTTGGGAGTTTTACTGTCA               | TCAAGGATTGCAGGGATACA              |
| 13  | 11666110 | 769          | SQ7077       | CAGCCAAGCTGAGAAGGAAT                | TTGCTGCTCTGTGTGTCTCA              |
| 13  | 11666774 | 700          | SQ7078       | CATCACAAACCTTGTGTATTTGG             | TCTCTAGTCATTTCAGTGGCAAA           |
| 13  | 11667369 | 695          | SQ7079       | CCTCAACGTTTTAGTTTGTAGCC             | AGACTCCTTTTTATTTGGAATCCT          |
| 13  | 11670458 | 697          | SQ7080       | GCATGGACAAGCTAGTTTTGAA              | GCCTAATTTGAACCATTCCTTTT           |
| 13  | 11670840 | 827          | SQ7081       | TCCCCCTATTCCCAACTCTC                | CCCTCTGATGAAATGGTAAAACA           |
| 13  | 11675064 | 829          | SQ7082       | CAAAGACAGCCAAGCGTATG                | CCTAGCACACAGTGGAGAGC              |
| 13  | 11682548 | 834          | SQ7083       | AAAACATCAAATGAGGATGCAA              | TTCTACAAATGAAACATTAATGAACAC       |
| 13  | 11683290 | 498          | SQ7084       | GGGATTATGGTCATAACTGCTTTC            | TTGTGCCTAAAAACAAACCTGA            |
| 13  | 11683681 | 530          | SQ7085       | CCACGTTGCTGAAGAGGAAT                | GACGTTTGTGCTCCATT                 |
| 13  | 11684155 | 700          | SQ7086       | AGCCACAGAGCTGAAAAGC                 | CAAATGAGCTTTCTAAAGTGAGATT         |
| 13  | 11684827 | 767          | SQ7087       | AGAAATCTCACTTTAGAAAGCTCATT          | TGGGGCATTTCAGAAATAAA              |
| 13  | 11684834 | 694          | SQ6939       | CAGGCTTTTAGCTGTTGAATCTT             | TCACTTTAGAAAGCTCATTGTCC           |
| 13  | 11684890 | 538          | SQ6942       | TCCAAAAGGGGACTACAGGTC               | TGAGGTATCATGAAAACGAACC            |
| 13  | 11685511 | 832          | SQ7088       | CAACAGCTAAAAGCCTGTAGAAGA            | TGAAGGTTTGCAGAGAACACA             |
| 13  | 11686227 | 785          | SQ7089       | TCTGGTGACTTTAGTAGGGTGTCA            | GCTGAATCTTTAGGCGTCA               |
| 13  | 11686555 | 845          | SQ7090       | GGCACTCATCAAAATGCACA                | CGATGGAGCTAACCGTAAAT              |
| 13  | 11686905 | 627          | SQ6938       | AGGGCTCTAGGCTGGAATGT                | ACCATGCCAGCCCTTAAATA              |
| 13  | 11686905 | 627          | SQ7091       | ACCATGCCAGCCCTTAAATA                | AGGGCTCTAGGCTGGAATGT              |
| 13  | 11687063 | 395          | SQ6941       | TGAGATGGCATTAGGAAACAAA              | CCAATTTGTTTTAGGTTGAACA            |
| 13  | 11705602 | 658          | SQ6937       | GCCTGCCTCTCTGGTCTAAC                | CAAGCTGTGTTTCAGATGATTG            |
| 13  | 11705760 | 376          | SQ6940       | TCGAGAAGGACAAGAGACACC               | TTTTTCGTTCCAAATTTTCAA             |
| 13  | 11706174 | 819          | SQ7092       | CCCACCCCCAAAAATAGATTA               | CATTTTTATTGTGTTTGGTGCTACA         |
| 13  | 11711208 | 493          | SQ7093       | ATCCAAGGGAGTCCCACAC                 | TGTCAGTCAAGTTCAAGCAA              |
| 13  | 11711681 | 594          | SQ7094       | TGCTTGAACCTTGACTGACAAT              | TCTGGATCTCAGCAGGCTTT              |
| 13  | 11712163 | 490          | SQ7095       | TCAAGCATGCAGGTGAATAAAA              | TGGGATAAAATGTGAGTAACTGGA          |
| 13  | 11714629 | 697          | SQ7096       | CAGCACACACTCATCCCAA                 | AGGGGAGACTTTTTCTACAGGA            |
| 13  | 11716636 | 738          | SQ7097       | AAACACACCCCAGCATGATT                | GGTGATTTGCTTTTGGCTTC              |
| 13  | 11727491 | 599          | SQ7098       | CAGTTTCCCATATGGAATTTAGAA            | GCAGCACTGCAGTTTTTCTAGA            |
| 13  | 11731866 | 838          | SQ7099       | GGGGAAATGAAAGAATCAAA                | AAATATTGGTGGCGATGAGG              |

|    |          |     |        |                                  |                               |
|----|----------|-----|--------|----------------------------------|-------------------------------|
| 13 | 11735521 | 553 | SQ7100 | GAAAGAAGAGAAAGATGGAGAGAGA        | CGCTGTTCTGCAACACCTT           |
| 13 | 11736024 | 600 | SQ7101 | GGGGACATCGAACAGAAGAG             | TGAAGCAACTGAATCCAAGTTTT       |
| 13 | 11753994 | 465 | SQ7102 | CCACTGCTGGAGGAAGACTC             | GGCTGGATAGGCTGGAAGAT          |
| 13 | 11776896 | 693 | SQ7103 | AGCCAGCTGCAACTCCTAAG             | CAGGAAAAGCAGGCAATAGG          |
| 13 | 11777385 | 700 | SQ7104 | TCATTTGACCACTCATGTTTCA           | GGGGGAATCAGATCTATTTTCTG       |
| 13 | 11778008 | 788 | SQ7105 | CCCAACCCACATAAGAGAG              | TTGCATTTGCTGTCAGAGGT          |
| 13 | 11787032 | 699 | SQ7106 | TAGGATTCACGGGGAGCAG              | TCCCCCATTTTTCTCATCTG          |
| 13 | 11787659 | 634 | SQ7107 | TGTAGGAATATGGACATGCAACA          | TCTCCTGTGATGTTTAACTTTGC       |
| 13 | 11788163 | 567 | SQ7108 | ACGCAGCAGTTTTTCAACCT             | GGCCCAGATATGTAATTGGTG         |
| 13 | 11788694 | 400 | SQ7109 | TCCAACCACTAGAAACACCAA            | TGTCTAAACAGTGACAGTTGGAA       |
| 13 | 11789066 | 846 | SQ7110 | CCGAGTTCCAAGTGTCACTG             | TGTTGCGCATACCAAACAAT          |
| 13 | 11789536 | 809 | SQ7111 | TGCTCCACAGTGAAGGTTTG             | CAAACCAACCTTTCGGATT           |
| 13 | 11792215 | 598 | SQ7802 | CGAGCCCAGAAAAGACCGTGTC           | ATTGATTGTAAGCACCTTCCCCTCCTC   |
| 13 | 11792710 | 589 | SQ7803 | GGAGGGAGGGGCGCGAAC               | AGTGGCATAGGGACCTCGAGAGTGAGT   |
| 13 | 11793261 | 534 | SQ7804 | CGCGCGACCGCACTCACT               | GTCTAGGAGAGGCCACCAGTCAGATCCT  |
| 13 | 11793441 | 507 | SQ7805 | CGGGATGCTTCTATAAGTAGGTGGTGCT     | TTGATTTTCAGCCGTGCTAACAGATCTTC |
| 27 | 5524829  | 669 | SQ7535 | CGTTCATGCTCACTGATCTAC            | ACTCGCGGACTCTTTGAAGATA        |
| 27 | 5525263  | 812 | SQ7534 | TGAGTGGGGATGGAGTTTTTAC           | GACAGTGGGAGGCATTTTCTAT        |
| 27 | 5526013  | 593 | SQ7533 | GGAAGTCCTACTCAAGCACAGG           | CTGCCCAGGTCAGTTTTATGTT        |
| 27 | 5526490  | 601 | SQ7787 | CTTTGTAGATGTGCCGAATGAAAAG        | GTGGTAGGATTATTGGCTCAGG        |
| 27 | 5526966  | 619 | SQ7788 | GATAGCAAAGATCACAGGTTCCCTC        | CCGGAGATAGAAAAGTTGGTTATGA     |
| 27 | 5527304  | 683 | SQ7532 | AAATGTAACCTGCACCGTTCTT           | CTTCCCCTCTCCTTATCTGTCC        |
| 27 | 5527872  | 589 | SQ7594 | CCTGTACGCGTGGTCAGAG              | GTGTCTATCATCGGTAGAGTTGAC      |
| 27 | 5528215  | 587 | SQ7595 | ACGCTAAGTTCCTGCTCTCAAG           | CTCTAAGGCACCACTGTCTGTC        |
| 27 | 5528263  | 493 | SQ7789 | GAGGACAACAGCAGATGAAGC            | GCTACCTGTTAGCACCAAGAGTG       |
| 27 | 5528901  | 388 | SQ7596 | AAACACCAACGTTTCTTCTATATTC        | CCAGCTTCAGGCTCAGGA            |
| 27 | 5529167  | 471 | SQ7597 | CGACTGTGCCCTGAAGGA               | GAAATTATAATCCTATTTTGCAGGTGAG  |
| 27 | 5529466  | 475 | SQ7682 | GAGCTAGTCTGCTGCTCCCTGT           | GCCAGGGAAGTCTCAGAAGACAGTAACA  |
| 27 | 5529828  | 600 | SQ7683 | CGAATTCTGGCTGGTTGGGAAAG          | GGTCTTGAGGCTTCCCACTCGT        |
| 27 | 5530280  | 398 | SQ7598 | GTCATCAGCAGTGGTGGAAG             | GAGGAGACAGAGAGGCGATG          |
| 27 | 5530546  | 689 | SQ7684 | CACCCTGGCGTTGTCTGCTGT            | GTTTTCTCTGGTGTCTGAGGATGCTG    |
| 27 | 5530978  | 588 | SQ7608 | ACTTTGCAAAAACAACCCCTTATT         | AGAGATAGATCAAGCTCCCCTCACT     |
| 27 | 5531412  | 641 | SQ7790 | CTATATTCTTCCCACGGCCTATC          | CAAACCTATTGTGATGGTGTGATT      |
| 27 | 5531911  | 653 | SQ7791 | CTTGTTGAGAAGAGATCGGAATG          | GGTGTGAGTGTAACAGGTTAGTGG      |
| 27 | 5532232  | 590 | SQ7599 | CTGATGGGCCTTCTGATCC              | GTTTTCTCTAAAGGCTGTTTCAGGTT    |
| 27 | 5532678  | 592 | SQ7610 | CCAGGACCAGAAAACCCCTTAG           | CTAACCCAAATTTCCATGTACACCT     |
| 27 | 5533104  | 696 | SQ7628 | GACTGTACTCTTGCTTTAGGACTCAAT      | ATAAATACATGAGTTTACTCCCCCAAT   |
| 27 | 5533581  | 655 | SQ7792 | ATTTCCACATGTGATTGAGATGAT         | GTTGTTTTCTTTTGTCTGTTGAG       |
| 27 | 5533718  | 563 | SQ7527 | CCCAGGAGTTAATGCTCATAGG           | AAAAAGAAAAAGTCCGTTAAAGTCC     |
| 27 | 5534134  | 600 | SQ7686 | GCAGAATGAGAGAAAACATTTGCAGATCA    | CAGTCTGCGTGTAACTCTATGAGCAACT  |
| 27 | 5534242  | 487 | SQ7793 | AAAACGTGAGCAAAGGACTTTAAC         | CTGCGTGAACCTCTATGAGCAACT      |
| 27 | 5534595  | 597 | SQ7611 | AAAAACAATGAAAATAAAAAGTGCT        | CATTAGTGGCACACAGGTGACT        |
| 27 | 5535113  | 568 | SQ7612 | TCCCAGCTCTCTCTCTTAAATAAATA       | CTGGGACTCAATGCAAAGAAG         |
| 27 | 5535550  | 554 | SQ7613 | ACCTCTTGGGTCATTTTGGAG            | GGAGCATCTCCTCTGAGCTTT         |
| 27 | 5536014  | 283 | SQ7600 | CCTCATACTCCTGGATCCACAC           | CAAGCAGAGCCACTCATCTG          |
| 27 | 5536115  | 499 | SQ7687 | CTGAGTGAGGAGGAAGCCGCTCT          | ATGTGGCTGCTGTGTGGGTAGGAGT     |
| 27 | 5536477  | 287 | SQ7601 | CTGAGCTGACGTCATCCAATAAC          | AAGGACTCTTAGCTGGACCAAG        |
| 27 | 5536624  | 476 | SQ7794 | CAAGCTGTATCGCTCAGGTTCTAT         | TAGCTTTTTGGAAGTTTTTGCTTC      |
| 27 | 5536682  | 397 | SQ7757 | TGCCCTATAACATCCTAGAACATACACAGCTT | TTCTACATTTGTGATGATCCGTTGGACA  |
| 27 | 5536875  | 451 | SQ7614 | GATCCAGATTCCTTCTCCTCT            | GATTTTATTTATTTATTACAGAGAGACG  |
| 27 | 5537208  | 616 | SQ7615 | TCCCTGGTCTAGGATTGAGT             | AAGGTGGGCCAGGTAG              |
| 27 | 5537730  | 397 | SQ7602 | GAACCCTGGCTCTGTCCTC              | AGTAGGAAGCAACTCTCAAACATTAGAC  |
| 27 | 5537876  | 498 | SQ7603 | AACAACATTGGGTGTTCCATTC           | GTCAAGTAGAAGTCTAGGGATCGAC     |
| 27 | 5538231  | 595 | SQ7604 | CTGGGATCTGGAACATC                | GACTGCTCTGTCCACTGCTG          |
| 27 | 5538729  | 571 | SQ7605 | CTGAAGACAGGTACAGGGGAAG           | CTCAGTTTTCCCTTGTGAGGAG        |
| 27 | 5539280  | 446 | SQ7607 | CCTGACAAGGGAAAAGTGAAG            | ACGTGTCACTCCTCCAGAG           |
| 27 | 5539899  | 396 | SQ7617 | GAACAAAGGGGCTCTTTCC              | AGTCAAGAGCTTAATTCATGGTTT      |
| 27 | 5540226  | 459 | SQ7616 | CTAGCTCAGCATAGAGAAAATGACTT       | CAAACATGCTCCAGCAAAG           |
| 27 | 5540501  | 498 | SQ7672 | GGGGCAGCTCATCCTCCTACC            | ACAAATCACCCGATGAAAGAAGACAC    |

|    |         |     |        |                              |                              |
|----|---------|-----|--------|------------------------------|------------------------------|
| 27 | 5540731 | 543 | SQ7523 | GGGCATCCATCAGGTCAC           | CTCCTGATCCATCCAGTCAAAT       |
| 27 | 5540829 | 673 | SQ7520 | AGATCAAGGCGCTGAACAAC         | CAAGGGGTAGGCTATTATCTGC       |
| 27 | 5541381 | 696 | SQ7519 | CATCACTTACCGCAATGTCT         | AGGTTGTCTTCCCTGTTGTCT        |
| 27 | 5542023 | 600 | SQ7518 | AATCCCAGCCAGTTTTCTGAG        | CCTCTTTCCAAGGTCCAACG         |
| 27 | 5542421 | 430 | SQ7673 | TTCCCTTCTTCAGAATGGTCAGCTTTTC | CTCCCACTTGGTCTCCAGCACCT      |
| 27 | 5542692 | 392 | SQ7674 | GTTGTGAGGGGCAAAGGAGAAAATG    | CTGCAGAAGGAGCTCAGAGGGAAAG    |
| 27 | 5542930 | 598 | SQ7618 | AGCAGCTGGAGACGCTGT           | ACATGGAGACTGAGTTTGGTTAAAA    |
| 27 | 5543440 | 581 | SQ7516 | GAGATTTCCCATAGAACGTTGG       | AGCCCCTGTGTGTCATCCT          |
| 27 | 5543715 | 497 | SQ7795 | GTACGAGGAAGAAATCAACAGGAG     | GAGATAGCTGCCCTTTTCTCTCT      |
| 27 | 5543985 | 400 | SQ7619 | ATAGTGAAGAACGGCAGAGGAT       | TAGAGACACTTGAAGAATTTGATCTCCT |
| 27 | 5544311 | 572 | SQ7509 | TATGCCAATAAGGTGGAGCTG        | CAGGGCGATCTCCTCGTACT         |
| 27 | 5544715 | 595 | SQ7620 | TCTGATAGTCAAGTCTGAGACCA      | AACTCATTTCCTCCCAATTATG       |
| 27 | 5545230 | 498 | SQ7515 | TGAGAATGTGAAGAAGCAGGTG       | GGCCTCTTATCAGTCATTTTCATC     |
| 27 | 5545582 | 596 | SQ7511 | CCAGCCTGTCCCTTTTCC           | TATGCCTGGCACTACCCTCAG        |
| 27 | 5545971 | 600 | SQ7514 | CAAGCTGGTGAGTGTGAGAGC        | CCACCTCCTCCCTTCACAC          |
| 27 | 5546361 | 500 | SQ7675 | TGGTACGTAGGTGGCCAAGTAAATGTCT | TAGGTGGCGATCTCCATGTCCAG      |
| 27 | 5546638 | 500 | SQ7676 | CAGTTTTCCAGCTTCTGTGATTCCCTGT | GTAGTAATGGGGTGGGCAGTATGCGTAG |
| 27 | 5546950 | 700 | SQ7513 | AGAAAGCTTAGCAGGGTCTCCT       | GGGCCTGATGTAGGTTTCTTTT       |
| 27 | 5547377 | 599 | SQ7677 | CTTGTGCCAAAGAAGCCCTGGAATTT   | ACCATGGGAGCAGGGAGACAG        |
| 27 | 5547863 | 599 | SQ7621 | AGAGCAACAACTTTGAGGTCAC       | CTCAGGGGCCATCCTCTAC          |
| 27 | 5548154 | 600 | SQ7679 | CTCAGCGGGACTGAGAATTAACCAGAG  | GGGAGACAGCTGGGGACGTG         |
| 27 | 5548627 | 572 | SQ7622 | GGCAGCGACTACAGGGATAC         | CTCCTCTTCTGTCTTCTGGATAC      |
| 27 | 5549125 | 598 | SQ7680 | GCTCATTCCGAGTAGGACCAAGTACGA  | AAAGGCCCAGGCCTCTGAGCA        |
| 27 | 5549678 | 600 | SQ7623 | GTGTTTATTCAACCCTTCTCTCAC     | ATGTGGCTCTTTTGTCTTG          |
| 27 | 5549992 | 472 | SQ7796 | GCCTGAGGATCTTACAAGATGAAA     | GGAGGTGGGAGGGTTCTTC          |
| 27 | 5550279 | 497 | SQ7624 | CTACCTGCTGCCTCTGCTACCT       | GTGACCTCACGTCCACCCTAC        |
| 27 | 5550526 | 597 | SQ7627 | GTTTTCTAGAGCAGCAGATCAAGGT    | CTGTTAGGTGTAAGCTTCCCTCAGTG   |
| 27 | 5551025 | 497 | SQ7625 | GAACGAGGGAGCGGAGAT           | GCCAGGCACGAGAGTACAA          |
| 27 | 5551404 | 735 | SQ7797 | GAAAAGGTGGTGCACATGAGT        | GAGGGTGGGAACGCACAG           |
| 27 | 5552086 | 596 | SQ7691 | GGTGTGGGAACCATGTGCCTCT       | ACCATTGTCTGGAGAAGGACCCTACC   |
| 27 | 5552632 | 498 | SQ7689 | CGGTCTGCGAGTGGGTCTT          | CTGTTTATGGCTCCGTCTTCCCTT     |
| 27 | 5552946 | 684 | SQ7690 | CCCGTCTCAGCTGTGGGCTTATC      | AGTTGGGAAGACGCCCTCGGTTAC     |
| 27 | 5553341 | 698 | SQ7626 | CTTTTAGGACAGGTGGGACAAG       | CCCTATATCTGATTGAAAATCCTAACT  |
| 27 | 5553945 | 608 | SQ7798 | GTGAGGGAGCTCTGAGCAAGT        | CGACAGAGAGAGGGTAGTGAAGTCT    |
| 27 | 5554364 | 676 | SQ7799 | TTTAGAAAATCATCAGGACGACAA     | ACACATCTGCAGAGACTACGAAAG     |
| 27 | 5554785 | 487 | SQ7500 | ACTCTTGTATTTGAGCCCGTGT       | CACCGCCATCAAAGTTGG           |
| 32 | 7421004 | 288 | SQ7498 | GTCTTGAAGCAAAACCAAACC        | CAGCAGGGAAGACAATCATGTA       |
| 32 | 7424265 | 348 | SQ7499 | TTCAGGCCCCAGGTCAATTAGTAT     | AAACAGGGAGCAAACCTGATAGC      |
| 32 | 7426001 | 587 | SQ7536 | GCTACCAATCAGAAGTAGCAAGC      | TGTCATTTTAGCTAGATGTCCTTGA    |
| 32 | 7427716 | 486 | SQ7494 | TGTGCTACATTGGTAGGTGTCA       | GTCAAAGCAATTCTCCAGAC         |
| 32 | 7429127 | 600 | SQ7537 | CGTCATACATGTTAAATTCCATACTTT  | AACAACAACAAAACCCAAACCA       |
| 32 | 7432230 | 396 | SQ7497 | TTTGCCAGTAAATTCTGTTCC        | AGAAATTTTCTGGGAGAAAGC        |
| 32 | 7437440 | 500 | SQ7495 | CCAAAATTGGTGTCAAGTCTC        | GCAAGTCCATAATGCCACCTAT       |
| 32 | 7438516 | 545 | SQ7538 | CAAAATTTTTATCATTTTCAGCATTC   | AGCTCTGCATGCCTAATTTCTC       |
| 32 | 7439334 | 245 | SQ7493 | TTTTCCAGGTATATTTGCATTGG      | TGAACATGGTCATTTTGAAGTCT      |
| 32 | 7441928 | 498 | SQ7539 | CCAGTTTTGACCATGTTACCTGT      | AAGCAACAGCAGGAAAGAAGC        |
| 32 | 7443430 | 399 | SQ7492 | TTTCTCTCCACATTAGTTTCCTGA     | TCTTTGACTGACGTATTTTTCAGTG    |
| 32 | 7444580 | 500 | SQ7540 | AAACTAAACTTTGCAACTCAACTCT    | CAATTACTGCTGATACTGCTTTTG     |
| 32 | 7444969 | 580 | SQ7541 | GGTTCTGAAGCTAAGAACTCTGG      | ATCCTTCTCCCCCTGAAG           |
| 32 | 7445356 | 500 | SQ7542 | GCCACCATCTCTGCTCTTTC         | TCCCTTCTCTCCCCATAAC          |
| 32 | 7447569 | 477 | SQ7490 | ACAAACCAGAATCAACCCAAAT       | TCACTGTGATTGGGAAAATCAG       |
| 32 | 7447879 | 493 | SQ7491 | TGCTTGAATAAGTTTGCATTCC       | AATATTTCCAAGGCAGGATAACA      |
| 32 | 7451755 | 471 | SQ7487 | CCTAACTTTACGCCATCAGGAC       | TCTGATACTGGGCTTTTCTTTTT      |
| 32 | 7455083 | 400 | SQ7486 | TTCATGGAAGAGGAAGTTGTT        | ACATTTCTGACACTGTACATCCAAT    |
| 32 | 7455380 | 397 | SQ7543 | TTGTAACAAAGACGTTTCATTTC      | GCAGAAGGATTAGGGGAAGG         |
| 32 | 7458227 | 350 | SQ7544 | GGAATGTTTGTTTTTGTTTGTCT      | CAGATGACACATGGAGAAATGA       |
| 32 | 7458428 | 497 | SQ7485 | TTCACCTACTGGTAGAACACATGAT    | AGGGCCTACTCTCCTCATT          |
| 32 | 7461931 | 450 | SQ7480 | CTGCTTCCAACCTCTCTATCTGT      | GACTTTTACAAAGGTTACTCCCTCTG   |
| 32 | 7462255 | 458 | SQ7481 | TAGTTTTATACAGGTTGGCCAGGT     | CATCTTCAAATGTGTGCAGAATC      |

|    |         |     |        |                              |                              |
|----|---------|-----|--------|------------------------------|------------------------------|
| 32 | 7462629 | 355 | SQ7482 | ATGAGAGGTGATGATGGCTTAAA      | GTTTGTCTCTCTCTTCTACCCCACT    |
| 32 | 7462819 | 363 | SQ7483 | ATCTGTCTCCTTCTACCTACAAT      | TCCAAGATATATAGAAATCCATACCA   |
| 32 | 7463035 | 458 | SQ7484 | GGTAACAGCCCCAGCTAGAA         | ACCACTTTGAGTACATTGGTGGTAT    |
| 32 | 7464676 | 468 | SQ7488 | TTTTCTTTCTTAATCCCATCACT      | AGATTGAAGTTTTCAATTCATTTGG    |
| 32 | 7467470 | 372 | SQ7479 | ATCAAATAACTTTTTGGAACAAATGG   | CGAAGTGTGTTCAAGTGGTAAGAGT    |
| 32 | 7467783 | 471 | SQ7477 | TTCCTCTCACAGTCAAGAAAAGTCT    | ATACCTCAACGATAAAGCTCATTTG    |
| 32 | 7468091 | 393 | SQ7478 | TACTCTCAGAACAGTGATTCCCCTA    | GTCCTGAGGTTATAGAGCTCTTCCT    |
| 32 | 7468324 | 361 | SQ7476 | AGTCACAAAAGACCCACTTCTACTG    | CTTAAGTCCATGTTCTTTCCAGGAC    |
| 32 | 7469233 | 422 | SQ7475 | CCAGAGATTGGCTCCACTAAG        | ATGGCAAATTTCTCTCGTGTCT       |
| 32 | 7469233 | 500 | SQ7546 | CCAGAGATTGGCTCCACTAAG        | ACCACCTCAGGCTCACCTC          |
| 32 | 7469586 | 597 | SQ7548 | TAGACTTTTGGGAGTCTGTCTG       | CGACCATTCTCCTCTGGTTAC        |
| 32 | 7469834 | 597 | SQ7547 | ACCTGCCCTTGAACCTG            | GCTGAACAGTGAAGAAGACGA        |
| 32 | 7470144 | 600 | SQ7549 | TTCCGATGATCCAGAAGTAAC        | GAGGTGCACTCAGACTTCTCT        |
| 32 | 7470683 | 554 | SQ7550 | GAACACAGGGCTCTTCTTAAA        | TTTTCTGAGTGAATGATTGTGG       |
| 32 | 7471153 | 392 | SQ7474 | GACAGCTTTGTACAGAACCAAG       | GGATTGAAATATTCCATGACTACA     |
| 32 | 7471377 | 400 | SQ7473 | CCAGGACAGCATTTACATAGTG       | CCTGACTTGCATTCTTGAA          |
| 32 | 7471643 | 365 | SQ7317 | TCAGCTTATGTGAATCGACCTT       | GTCTGGGCACCAGCACAC           |
| 32 | 7471931 | 299 | SQ7472 | GCTAATCCTTCTGCCAAGG          | CAGGAGGAGGCTGCTGTG           |
| 32 | 7472055 | 150 | SQ7471 | CTTCCCGTAAGGAAAAGCAAAT       | GTCTCTGCTTATTTCAGCAGCTAAG    |
| 32 | 7472184 | 233 | SQ7465 | GCTGCTGAATAAAGCAGAGACC       | AGCACCAAGGTCCAGGT            |
| 32 | 7472184 | 387 | SQ7466 | GCTGCTGAATAAAGCAGAGACC       | GCTCGAGCGTACGAATCC           |
| 32 | 7472305 | 266 | SQ7582 | CTCTGAAGTGCTGGGAGTCTC        | GCTCGAGCGTACGAATCC           |
| 32 | 7472393 | 178 | SQ7467 | GAGGGGACCTGGACCTTG           | GCTCGAGCGTACGAATCC           |
| 32 | 7472715 | 150 | SQ7469 | CACTCGCCGTCTCCCATC           | TATACCGCCGGTGACCTC           |
| 32 | 7472715 | 357 | SQ7346 | CACTCGCCGTCTCCCATC           | GAGGAGGACAAGTCTATTCTT        |
| 32 | 7472856 | 597 | SQ7318 | GGCGGTATAAATATCCAGGAC        | GCTTAGGACGCGCTCTGC           |
| 32 | 7472924 | 575 | SQ7319 | CTCTCTCCCCGAGGCTAT           | CCAGGGTGCAAAAACACC           |
| 32 | 7473016 | 379 | SQ7580 | CCCTACAAGATGCGCTTAGAG        | GAGCCATTGACTTTGCCATC         |
| 32 | 7473215 | 397 | SQ7579 | GTCTTCTCTTCTTCTCCTCGTCT      | GAATCGCTTCTCTTACC            |
| 32 | 7473399 | 387 | SQ7563 | GAAGCCAATATGTTAAGTAAGTTGCTC  | CTCAAGAGAAAATGCTAGTCTCAGTAAA |
| 32 | 7473591 | 599 | SQ7565 | GGGTAAGAGGAAAGGCGATT         | AACTTTTCTTGATTGTCCTTGG       |
| 32 | 7473800 | 630 | SQ7552 | CCTTTTCTTGTCATAACTG          | AGATCGTCTCCCCATCAGC          |
| 32 | 7473971 | 243 | SQ7564 | ACATGTATGTATATTCGAGGGGAGA    | CTCTGAGTCTTCCAAAATAAAGAAC    |
| 32 | 7473971 | 685 | SQ7567 | ACATGTATGTATATTCGAGGGGAGAC   | GAAGCGAAGCAAGTCAAGTACAC      |
| 32 | 7474180 | 197 | SQ7577 | AGGAAAAGTTCTTTATTTTGAAGG     | GATAGGCCGGGAAGACTAGG         |
| 32 | 7474292 | 238 | SQ7568 | AGCTTTCTCTTAGCTCTCTCTCTC     | GAGGTCTGTCTGCTGGATCAAC       |
| 32 | 7474383 | 244 | SQ7566 | CCCTGATTGCTCTCACTGC          | CTACCAGGCTGACACACGAC         |
| 32 | 7474815 | 321 | SQ7575 | TGCCTCCCTGCCTAGTCC           | CTCTGGTGTCTGATGGAGTAAAGAG    |
| 32 | 7474893 | 397 | SQ7760 | ATCGGGGACCCCTGCGAGT          | CAACCTGCAGCTTTTGCATCTAATTTG  |
| 32 | 7474936 | 200 | SQ7569 | GAGGAGCCTCTCTCCAGGT          | CTCTGGTGTCTGATGGAGTAAAGAG    |
| 32 | 7475390 | 392 | SQ7762 | GCCAGACTCATTCCCAAGATATTCACCT | CAAGCTTGATGATGATGCAGGTAGCC   |
| 32 | 7475629 | 600 | SQ7556 | CAGCATCTAAGTAAAACCTCCTAAC    | TCCTCTATGGTCTCTTTGGTC        |
| 32 | 7476134 | 500 | SQ7557 | GTCATGGGCTGTTGGTTAGAG        | GAGTGTATCTGCAATGAGCTTGA      |
| 32 | 7476492 | 744 | SQ7558 | AAGCACACCCTGGTCATAGATT       | TCTTCCATTTGATTTTTCTATTCA     |
| 32 | 7480884 | 400 | SQ7322 | CTCCCTCTGCCTATATTTCTGC       | CGTATTCCTACAATCCCCTGAG       |
| 32 | 7481140 | 336 | SQ7323 | TCACAGCTATAAAGAATGAAAAGAATC  | TTTTAAAACCCAAGAAATCATTAA     |
| 32 | 7482983 | 365 | SQ7324 | TTGGTTTGTAGGGTGAGTACC        | GCTTCAGTGAGTGACAAGAGCA       |
| 32 | 7483205 | 499 | SQ7325 | TAAGGATGGCTGGCTGAAATAA       | AGCCTTTTAAAGTACAATGCAA       |
| 32 | 7485973 | 582 | SQ7326 | GAGGCAAAGATTTCTTCAATCA       | CCTTAGAGGGCAGGTAGAATTT       |
| 32 | 7491727 | 596 | SQ7327 | CTATGCTACCTCAAGGGCAGAC       | TGCTTTAAAATACCGTGTGCAT       |
| 32 | 7492047 | 573 | SQ7328 | TTTTACGAGGCAATTGTTCTT        | CTTGTGAGCGCCACGTA            |
| 32 | 7492338 | 594 | SQ7329 | CAAACGTCTTTGCAAAAGAGAA       | GTGTTGTTTTCGCTCTTCTGG        |
| 32 | 7492678 | 565 | SQ7330 | ACTTCTGCCAAGGTTCAAG          | GCATCAAATATTCTTTGAAACC       |
| 32 | 7492948 | 585 | SQ7331 | AAACACAAAAGAACCGTTGGAT       | GTGCCGTTGAAAGAGGATTTAAG      |
| 32 | 7493222 | 599 | SQ7332 | TTCCAAAGAATATTTTATGATGCAGA   | AGGGCAGGGTGGGTAGATAA         |
| 32 | 7493538 | 492 | SQ7333 | GCTTAGGTCTATGCATGTGTGC       | ATTTTTGACAATGGGACTCGAT       |

\* Primers that were used to re-sequence the exons of the three genes are highlighted in pink.



Table S5: Polymorphisms found from sequencing in and around *RSPO2*, the positions of SNPs discovered, and their genotypes in % in dogs with and without furnishings. Primers used to obtain the sequences from which the SNPs were discovered are listed in Table S4. Only the deletion at position 11634766 is perfectly associated with the dominant phenotype.

| Primer Name | Position              | Allele A | Allele B | count A <sup>a</sup> | count B <sup>a</sup> | Cases |          | Controls |          |
|-------------|-----------------------|----------|----------|----------------------|----------------------|-------|----------|----------|----------|
|             |                       |          |          |                      |                      | %AA   | %(AB+BB) | %AA      | %(AB+BB) |
| SQ7056      | 11627783              | C        | T        | 29                   | 25                   | 100   | 0        | 7        | 93       |
| SQ7057      | 11634029              | A        | G        | 12                   | 2                    | 100   | 0        | 75       | 25       |
| SQ7058      | 11634766              | DEL      | INS      | 334                  | 298                  | 0     | 100      | 100      | 0        |
| SQ7058      | 11634923              | T        | C        | 651                  | 99                   | 97    | 3        | 63       | 37       |
| SQ7058      | 11634989              | T        | G        | 77                   | 667                  | 0     | 100      | 11       | 89       |
| SQ7058      | 11635006              | T        | C        | 668                  | 80                   | 97    | 3        | 71       | 29       |
| SQ7058      | 11635059              | T        | C        | 727                  | 21                   | 100   | 0        | 91       | 9        |
| SQ7060      | 11635851              | T        | C        | 168                  | 594                  | 1     | 99       | 30       | 70       |
| SQ7060      | 11635863              | T        | C        | 662                  | 100                  | 97    | 3        | 64       | 36       |
| SQ7060      | 11635955              | G        | C        | 89                   | 673                  | 0     | 100      | 14       | 86       |
| SQ7060      | 11636011              | G        | A        | 671                  | 77                   | 98    | 2        | 72       | 28       |
| SQ7060      | 11636075              | G        | A        | 372                  | 400                  | 1     | 99       | 88       | 12       |
| SQ7061      | 11636793              | T        | A        | 37                   | 11                   | 100   | 0        | 20       | 80       |
| SQ7062      | 11637304              | G        | A        | 15                   | 1                    | 100   | 0        | 75       | 25       |
| SQ7062      | 11637535              | C        | T        | 14                   | 2                    | 100   | 0        | 75       | 25       |
| SQ7062      | 11637610              | C        | T        | 14                   | 2                    | 100   | 0        | 75       | 25       |
| SQ7063      | 11638093              | G        | A        | 8                    | 34                   | 0     | 100      | 22       | 78       |
| SQ7063      | 11638434              | G        | A        | 13                   | 1                    | 100   | 0        | 67       | 33       |
| SQ7069      | 11659275              | T        | C        | 1                    | 13                   | 0     | 100      | 0        | 100      |
| SQ7069      | 11659430              | T        | C        | 5                    | 9                    | 0     | 100      | 50       | 50       |
| SQ7070      | 11660194              | A        | G        | 27                   | 29                   | 0     | 100      | 93       | 7        |
| SQ7074      | 11661682              | A        | G        | 11                   | 5                    | 100   | 0        | 25       | 75       |
| SQ7074      | 11661778              | A        | G        | 10                   | 6                    | 100   | 0        | 25       | 75       |
| SQ7074      | 11661960 <sup>b</sup> | T        | C        | 31                   | 29                   | 100   | 0        | 0        | 100      |
| SQ7075      | 11662380              | T        | G        | 4                    | 8                    | 0     | 100      | 67       | 33       |
| SQ7076      | 11665702              | T        | C        | 13                   | 1                    | 100   | 0        | 67       | 33       |
| SQ7076      | 11666005              | T        | C        | 28                   | 32                   | 0     | 100      | 87       | 13       |
| SQ7077      | 11666247              | T        | C        | 45                   | 11                   | 100   | 0        | 38       | 62       |
| SQ7077      | 11666379              | GGGAGG   | CGGGGGGG | 45                   | 9                    | 100   | 0        | 50       | 50       |
| SQ7078      | 11667011              | T        | G        | 2                    | 10                   | 0     | 100      | 33       | 67       |
| SQ7080      | 11670855              | +        | -        | 15                   | 123                  | 0     | 100      | 19       | 81       |
| SQ7080      | 11670883              | +        | -        | 105                  | 41                   | 87    | 13       | 40       | 60       |
| SQ7081      | 11671222              | A        | G        | 5                    | 11                   | 0     | 100      | 50       | 50       |
| SQ7083      | 11683136              | +        | -        | 5                    | 11                   | 0     | 100      | 50       | 50       |
| SQ7085      | 11684089              | T        | C        | 15                   | 1                    | 100   | 0        | 75       | 25       |
| SQ7086      | 11684366              | T        | C        | 4                    | 8                    | 0     | 100      | 67       | 33       |
| SQ7086      | 11684698              | +        | -        | 10                   | 4                    | 100   | 0        | 50       | 50       |
| SQ7087      | 11684906              | T        | C        | 26                   | 716                  | 0     | 100      | 3        | 97       |
| SQ7087      | 11685055              | A        | G        | 611                  | 139                  | 96    | 4        | 51       | 49       |
| SQ7087      | 11685279              | +        | -        | 11                   | 5                    | 100   | 0        | 25       | 75       |
| SQ7087      | 11685363              | +        | -        | 10                   | 4                    | 100   | 0        | 33       | 67       |
| SQ7088      | 11685608              | T        | C        | 5                    | 9                    | 0     | 100      | 50       | 50       |

|        |          |    |    |    |    |     |     |     |    |
|--------|----------|----|----|----|----|-----|-----|-----|----|
| SQ7093 | 11711400 | +  | -  | 11 | 5  | 100 | 0   | 25  | 75 |
| SQ7094 | 11712030 | G  | A  | 6  | 10 | 0   | 100 | 75  | 25 |
| SQ7095 | 11712492 | T  | C  | 10 | 4  | 100 | 0   | 33  | 67 |
| SQ7098 | 11728003 | T  | C  | 6  | 10 | 25  | 75  | 25  | 75 |
| SQ7099 | 11732315 | T  | G  | 13 | 3  | 100 | 0   | 50  | 50 |
| SQ7101 | 11736251 | T  | A  | 8  | 8  | 50  | 50  | 25  | 75 |
| SQ7101 | 11736540 | T  | C  | 11 | 5  | 100 | 0   | 25  | 75 |
| SQ7109 | 11788888 | CC | GT | 11 | 3  | 33  | 67  | 100 | 0  |
| SQ7111 | 11790228 | A  | G  | 5  | 9  | 33  | 67  | 25  | 75 |
| SQ7802 | 11792301 | T  | A  | 8  | 6  | 33  | 67  | 50  | 50 |
| SQ7802 | 11792702 | G  | A  | 10 | 4  | 100 | 0   | 50  | 50 |
| SQ7804 | 11793473 | T  | A  | 4  | 10 | 25  | 75  | 33  | 67 |
| SQ7805 | 11793747 | G  | C  | 12 | 2  | 67  | 33  | 100 | 0  |

a) SNP discovery was done in a set of 8 dogs, 4 cases and 4 controls. Additional dogs were genotyped at the best associated variants to find the most likely causative variant.

b) Three controls are heterozygous, not in accord with the expected dominant inheritance of the trait.

Table S6: Positions of 41 SNPs shown in Figure S3 and their genotypes in 491 dogs including 293 long hair (case) and 197 short hair (control) dogs. Single marker chi-squared association values calculated using PLINK are listed in the last two columns of the table.

| SNPs Name       | Position       | Allele A | Allele B | P                | -log(pValue)       |
|-----------------|----------------|----------|----------|------------------|--------------------|
| BICF2G630601674 | 6793199        | T        | G        | 0.09735          | 1.011664044        |
| BICF2P970788    | 6841989        | A        | G        | 0.52             | 0.283996656        |
| BICF2P1172266   | 6892257        | G        | C        | 0.4439           | 0.352714855        |
| BICF2S23149334  | 6940786        | C        | T        | 4.38E-17         | 16.35892269        |
| BICF2P842830    | 6993895        | C        | G        | 0.03067          | 1.513286224        |
| BICF2G630601460 | 7045859        | A        | G        | 5.56E-05         | 4.255237763        |
| BICF2G630601377 | 7095045        | A        | C        | 7.34E-21         | 20.13424478        |
| BICF2S23530750  | 7144649        | G        | A        | 1.33E-09         | 8.876148359        |
| BICF2P1011631   | 7196941        | G        | T        | 0.838            | 0.076755981        |
| BICF2G630601206 | 7247220        | C        | T        | 9.15E-15         | 14.03881629        |
| BICF2G630601167 | 7297214        | A        | G        | 1.13E-26         | 25.94692156        |
| BICF2G630601051 | 7344661        | A        | C        | 0.307            | 0.512861625        |
| BICF2G630601004 | 7375965        | C        | T        | 2.11E-23         | 22.67633546        |
| BICF2P1450971   | 7398185        | A        | C        | 3.95E-44         | 43.40296334        |
| BICF2P715701    | 7420804        | T        | C        | 1.29E-37         | 36.88806572        |
| BICF2G630600864 | 7471305        | T        | C        | 3.94E-79         | 78.40417322        |
| BICF2G630600863 | 7472206        | G        | A        | 2.96E-82         | 81.52826835        |
| <b>SNP-SL</b>   | <b>7473337</b> | <b>G</b> | <b>T</b> | <b>7.68E-157</b> | <b>156.1147519</b> |
| BICF2G630600857 | 7477172        | A        | G        | 4.37E-74         | 73.35951856        |
| BICF2G630600849 | 7479580        | C        | T        | 5.85E-18         | 17.23254728        |
| BICF2G630600848 | 7482867        | A        | G        | 3.48E-27         | 26.45829598        |
| BICF2G630600847 | 7483659        | C        | A        | 5.85E-08         | 7.232992636        |
| BICF2G630600842 | 7487725        | T        | C        | 2.10E-21         | 20.67716073        |
| BICF2G630600841 | 7488555        | A        | C        | 1.48E-18         | 17.83003183        |
| BICF2P257161    | 7490570        | C        | T        | 3.40E-10         | 9.468265691        |
| BICF2G630600840 | 7490779        | G        | A        | 5.37E-07         | 6.269783159        |
| BICF2G630600839 | 7492364        | C        | G        | 0.02377          | 1.623970818        |
| BICF2G630600838 | 7495748        | A        | G        | 0.0006782        | 3.168642215        |
| BICF2G630600828 | 7547610        | G        | T        | 2.40E-14         | 13.61960784        |
| BICF2G630600792 | 7598402        | G        | A        | 2.10E-14         | 13.67695426        |
| BICF2P629393    | 7644742        | G        | A        | 0.4852           | 0.314079208        |
| BICF2G630600757 | 7673046        | C        | A        | 4.87E-42         | 41.31238187        |
| BICF2S2311078   | 7696578        | C        | T        | 3.69E-06         | 5.432738308        |
| BICF2G630600742 | 7749679        | A        | G        | 2.23E-22         | 21.65091683        |
| BICF2G630600698 | 7796456        | T        | C        | 6.04E-16         | 15.21896306        |
| BICF2P1079945   | 7844234        | A        | C        | 5.26E-19         | 18.27876663        |
| BICF2S2434904   | 7892560        | T        | C        | 4.30E-08         | 7.366531544        |
| BICF2G630600463 | 7986139        | A        | G        | 3.03E-10         | 9.519274621        |
| BICF2G630600443 | 8035292        | A        | T        | 1.54E-13         | 12.8113527         |
| BICF2S2347352   | 8085793        | G        | A        | 1.16E-06         | 5.934420285        |
| BICF2P1287140   | 8133439        | T        | C        | 2.37E-07         | 6.624702262        |

Table S7: SNP genotypes obtained from sequences on CFA32, the fur length locus. Positions of SNPs discovered in this study as well as there genotypes in long and short-haired dogs. Primers used to obtain the sequences from which the SNPs were discovered are listed in the table S4. Only one SNP, position 7,473,337, is perfectly associated with the phenotype in this dataset.

|                         |          |          | 1        | 2          | 3           | 4                      | 5           | 6         | 7         | 8      | 9              | 10  |
|-------------------------|----------|----------|----------|------------|-------------|------------------------|-------------|-----------|-----------|--------|----------------|-----|
|                         |          |          | HAVANESE | AM. ESKIMO | STD. POODLE | DACHSHUND <sup>d</sup> | ENTLEBUCHER | DACHSHUND | DACHSHUND | COLLIE | BOSTON TERRIER | PUG |
| MARKERS                 | position | distance | LONG     |            |             |                        | SHORT       |           |           |        |                |     |
| SQ7498                  | 7421159  | 3263     | AA       | AT         |             | AT                     | AA          | TT        | TT        | TT     | TT             | TT  |
| SQ7499                  | 7424422  | 17622    | GG       | TG         | TG          |                        | GG          | TT        | TT        | TT     | TT             | TT  |
| SQ7539                  | 7442044  | 1474     | CC       | CC         | CT          | CT                     | CT          | TT        | TT        | TT     | TT             | TT  |
| SQ7492                  | 7443518  | 48       | CC       | CC         | TC          | CC                     | CC          | CC        | CC        | CC     | CC             | CC  |
| SQ7492                  | 7443566  | 4165     | GG       | GG         | GG          | GT                     | GG          | GT        | GG        | GG     | TT             | TT  |
| SQ7490                  | 7447731  | 28       | AA       | AA         | AA          | AG                     | AA          | AG        | AA        | AA     | GG             | GG  |
| SQ7490                  | 7447759  | 15       | CC       | CC         | CC          | CT                     | CC          | CT        | CC        | CC     | TT             | TT  |
| SQ7490                  | 7447774  | 0        | GG       | GG         | GG          | GG                     | GT          | GG        | GG        | GG     | GG             | GG  |
| SQ7490                  | 7447774  | 81       | TT       | TT         | TT          | CT                     | TT          | CT        | TT        | TT     | CC             | CC  |
| SQ7490                  | 7447855  | 14       | AA       | AA         | AA          | AT                     | AA          | AT        | AA        | AA     | TT             | TT  |
| SQ7490                  | 7447869  | 200      | CT       | TT         | CT          | CT                     | CT          | CT        | TT        | TT     | CC             | CC  |
| SQ7491                  | 7448069  | 162      | AA       | AA         | AA          | GA                     | GA          | GA        | AA        | AA     | GG             | GG  |
| SQ7491                  | 7448231  | 3778     | TT       | TT         | TT          | GT                     | TT          | GT        | TT        | TT     | GG             | GG  |
| SQ7487                  | 7452009  | 4        | AA       | AA         | AA          | GA                     | GA          | GA        | AA        | AA     | GG             | GG  |
| SQ7487                  | 7452013  | 3576     | CC       | CC         | CC          | GC                     | GC          | GC        | CC        | CC     | GG             | GG  |
| SQ7543                  | 7455589  | 1727     | CC       | CC         | CT          | CT                     | CT          | CT        | CC        | CC     | TT             | TT  |
| <i>AFFY<sup>a</sup></i> | 7457316  | 1313     |          |            |             |                        |             |           |           |        |                |     |
| SQ7544/7485             | 7458629  | 3455     | TT       | AT         | AT          | AT                     | TT          | TT        | TT        | TT     | TT             | TT  |
| SQ7480                  | 7462084  | 353      | TT       | CT         | CT          | CT                     | TT          | TT        | TT        | TT     | TT             | TT  |
| SQ7481                  | 7462437  | 91       | TT       | CT         | CT          | CT                     | TT          | TT        | TT        | TT     | TT             | TT  |
| SQ7481                  | 7462528  | 45       | GG       | GA         | GA          | GA                     | GA          | GG        | GG        | GG     | GG             | GG  |
| SQ7481                  | 7462573  | 315      | TT       | CT         | CT          | CT                     | TT          | TT        | TT        | TT     | TT             | TT  |
| SQ7483                  | 7462888  | 45       | TT       | CT         | CT          | CT                     | CT          | TT        | TT        | TT     | TT             | TT  |
| SQ7483                  | 7462933  | 73       | GG       | GA         | GA          | GA                     | GG          | GG        | GG        | GG     | GG             | GG  |
| SQ7483                  | 7463006  | 74       | GG       | GA         | GA          | GA                     | GA          | GG        | GG        | GG     | GG             | GG  |
| SQ7483                  | 7463080  | 18       | CC       | CT         | CT          | CT                     | CC          | CC        | CC        | CC     | CC             | CC  |
| SQ7483                  | 7463098  | 1739     | GG       | GC         | GC          | GC                     | GG          | GG        | GG        | GG     | GG             | GG  |
| SQ7488                  | 7464837  | 2786     | GG       | AG         | AG          | AG                     | AG          | GG        | GG        | GG     | GG             | GG  |
| SQ7479                  | 7467623  | 60       | GG       | GA         | GA          | GA                     | GA          | GG        | GG        | GG     | GG             | GG  |
| SQ7479                  | 7467683  | 293      | AA       | AC         | AC          | AC                     | AC          | AA        | AA        | AA     | AA             | AA  |
| SQ7477                  | 7467976  | 56       | AA       | AG         | AG          | AG                     | AG          | AA        | AA        | AA     | AA             | AA  |
| SQ7477                  | 7468032  | 90       | TT       | CT         | CT          | CT                     | CC          | TT        | TT        | TT     | TT             | TT  |
| SQ7477                  | 7468122  | 385      | GG       | GC         | GC          | GC                     | GG          | GG        | GG        | GG     | GG             | GG  |
| SQ7476                  | 7468507  | 39       | TT       | CT         | CT          | CT                     | CT          | TT        | TT        | TT     | TT             | TT  |
| SQ7476                  | 7468546  | 780      | GG       | GA         | AA          | GA                     | GA          | GG        | GG        | GG     | GG             | GG  |
| SQ7546                  | 7469326  | 92       | AA       | AG         | AG          | AG                     | AG          | AA        | AA        | AA     | AA             | AA  |
| SQ7546                  | 7469418  | 220      | CC       | CG         | CC          | GC                     | GC          | GG        | GG        | GG     | GG             | GG  |
| SQ7548                  | 7469638  | 370      | TT       | CT         | CT          | CT                     | TT          | TT        | TT        | TT     | TT             | TT  |
| SQ7547                  | 7470008  | 237      | TT       | CT         | CC          | CC                     | CT          | CC        | CC        | CC     | CC             | CC  |
| SQ7547* <sup>c</sup>    | 7470245  | 467      | GG       | GG         | GG          | GG                     | GG          | AA        | AA        | AA     | AA             | AA  |

|                  |                      |                            |         |     |     |     |     |     |     |     |     |     |     |     |
|------------------|----------------------|----------------------------|---------|-----|-----|-----|-----|-----|-----|-----|-----|-----|-----|-----|
| SEQUENCED REGION | SQ7550               | 7470712                    | 281     |     | CC  | CC  | CC  | CT  | CC  | CC  | CC  | CC  | CC  | CC  |
|                  | SQ7550               | 7470993                    | 312     |     | CC  | CC  | CC  | CT  | CC  | CC  | CC  | CC  | CC  | CC  |
|                  | SQ7474               | 7471305                    | 650     | CC  | CC  | CT  | CC  | CC  | TT  | TT  | TT  | TT  | TT  | TT  |
|                  | SQ7472               | 7471955                    | 113     | CC  |     | CG  | CC  |
|                  | SQ7472               | 7472068                    | 43      | AA  | AA  | CA  | AA  | AA  | AA  | AA  | AA  |     | AA  | AA  |
|                  | SQ7472               | 7472111                    | 95      | GG  | GG  | GG  | GA  | GA  | GG  | GG  | GG  |     | GG  | GG  |
|                  | SQ7472               | 7472206                    | 98      | GG  | AA  | AA  | AA  | AA  | GG  | GG  | GG  | GG  | GG  | GG  |
|                  | SQ7465-SQ7466        | 7472304                    | 192     | AA  | AA  | AA  | AA  | GG  | AA  | AA  | AA  | AA  | AA  | AA  |
|                  | SQ7466-SQ7582        | 7472496                    | 388     | CC  |     | CC  |
|                  | SQ7346-SQ7318        | 7472884                    | 2       | CC  | CC  | CC  | CT  | TT  | CC  | CC  | CC  | CC  | CC  | CC  |
|                  | SQ7346-SQ7318        | 7472886                    | 12      | AA  | AA  | AA  | AC  | CC  | AA  | AA  | AA  | AA  | AA  | AA  |
|                  | SQ7346* <sup>c</sup> | 7472898                    | 305     | GG  | GG  | GG  | GG  | GG  | AA  | AA  | AA  | AA  | AA  | AA  |
|                  | SQ7580* <sup>c</sup> | 7473203                    | 134     | -/- | -/- | -/- | +/- | -/- | +/+ | +/+ | +/+ | +/+ | +/+ | +/+ |
|                  | SQ7319 <sup>e</sup>  | 7473337                    | 1145    | TT  | TT  | TT  | TT  | GG  |
|                  | SQ7567               | 7474482                    | 397     | +/+ | +/+ | +/+ | +/- | -/- | +/- | -/- | -/- | +/+ | +/+ | +/+ |
|                  | SQ7575               | 7474879                    | 88      | CC  |     | CC  | CC  | CT  | CC  | CC  | CC  | CC  | CC  | CC  |
|                  | SQ7575R              | 7474967                    | 104     | GG  | GG  | GT  | GT  | TT  | TT  | TT  | TT  | GG  | GG  | GG  |
|                  | SQ7575-SQ7569        | 7475071                    | 32      | TT  | TT  | CT  | CT  | CT  | CC  | CC  | CC  | TT  | TT  | TT  |
|                  | SQ7575-SQ7569        | 7475103                    | 407     | -/- | -/- | +/- | +/- | +/- | +/+ | +/+ | +/+ | -/- | -/- | -/- |
|                  | SQ7762               | 7475510                    | 35      | CC  | CC  | CT  | CT  | CC  |     |     |     | CC  | CC  | CC  |
|                  | SQ7762               | 7475545                    | 110     | CC  | CC  | CT  | CT  | CC  |     |     |     | CC  | CC  | CC  |
|                  | SQ7556               | 7475655                    | 201     | CC  |
|                  | SQ7556               | 7475856                    | 27      | AA  | AA  | AA  | AA  | AA  | CC  | CC  | CC  | AA  | AA  | AA  |
|                  | SQ7556               | 7475883                    | 47      | GG  |
|                  | SQ7556               | 7475930                    | 1242    | CC  | CC  | CT  | CT  | CC  | TT  | TT  | TT  | CC  | CC  | CC  |
|                  |                      | <i>SNPlex</i> <sup>b</sup> | 7477172 |     |     |     |     |     |     |     |     |     |     |     |

Homozygous region

- The upper and lower boundaries of the homozygous region identified in the whole genome scan.
- The lower boundaries of the homozygous region identified in the SNPlex fine Mapping (Applied Biosystems).
- Additional dogs were genotyped at positions marked with an \* in order to verify the association: SQ7547 - one long haired dog had the short genotype and 4 short-haired dogs had the long genotype, SQ7346 - 5 short-haired dogs including a wolf had the long genotype.
- Long hair is not fixed in the dachshund, therefore we did not include this dog when identifying a homozygous region in which to search for the mutation.
- SNP showing the strongest association in both the SNPlex and sequencing datasets.

Table S8. Positions of 59 SNPs shown in Figure S4 and their genotypes in 668 dogs including 91 curly haired (cases) and 577 not curly haired (control) dogs. Single marker chi-squared association values calculated using PLINK are listed in the last two columns of the table.

| SNPs Name       | Position | Allele A | Allele B | P         | -log(pValue) |
|-----------------|----------|----------|----------|-----------|--------------|
| BICF2G630138039 | 4967176  | C        | T        | 1.05E-09  | 8.977571629  |
| BICF2G630138044 | 4978651  | A        | G        | 0.3755    | 0.425390059  |
| BICF2G630138050 | 4993849  | C        | G        | 0.3821    | 0.417822962  |
| BICF2P87330     | 5017959  | A        | G        | 0.6222    | 0.206069993  |
| BICF2P1026912   | 5052085  | A        | G        | 7.65E-05  | 4.116338565  |
| BICF2G630138105 | 5077862  | G        | A        | 0.5261    | 0.278931698  |
| BICF2G630138120 | 5100098  | C        | T        | 0.01113   | 1.953504836  |
| BICF2S23160960  | 5148729  | C        | T        | 4.49E-13  | 12.34794715  |
| BICF2P508051    | 5174490  | T        | C        | 0.8627    | 0.064140202  |
| BICF2P961848    | 5187936  | C        | T        | 0.3448    | 0.462432743  |
| BICF2P371124    | 5194293  | T        | C        | 3.19E-26  | 25.49634548  |
| BICF2P420175    | 5202833  | C        | T        | 1.36E-16  | 15.86774031  |
| BICF2P1077589   | 5222024  | A        | G        | 0.05563   | 1.25469094   |
| BICF2G630138171 | 5247225  | G        | A        | 1.22E-05  | 4.914352712  |
| BICF2G630138178 | 5270376  | G        | A        | 0.03225   | 1.491470281  |
| BICF2G630138191 | 5291199  | T        | A        | 1.62E-06  | 5.790484985  |
| BICF2S23530490  | 5299987  | A        | G        | 9.47E-05  | 4.023604163  |
| BICF2G630138213 | 5310323  | T        | C        | 2.77E-06  | 5.556893543  |
| BICF2G630138253 | 5323552  | T        | C        | 4.66E-09  | 8.331241458  |
| BICF2P58381     | 5332310  | T        | G        | 0.5375    | 0.269621531  |
| BICF2P232376    | 5343650  | A        | G        | 0.001275  | 2.894489815  |
| BICF2P763738    | 5353368  | C        | T        | 4.96E-09  | 8.30434324   |
| BICF2G630138293 | 5363891  | C        | G        | 0.2444    | 0.611898798  |
| BICF2G630138320 | 5374209  | T        | A        | 1.79E-09  | 8.747389659  |
| BICF2P1408366   | 5384201  | G        | A        | 1.82E-11  | 10.74088416  |
| BICF2G630138348 | 5405901  | A        | G        | 0.002788  | 2.554707231  |
| BICF2P320026    | 5418384  | C        | T        | 0.2079    | 0.682145511  |
| BICF2G630138386 | 5440913  | A        | G        | 1.56E-10  | 9.808269607  |
| BICF2G630138391 | 5451880  | T        | C        | 0.02685   | 1.57105571   |
| BICF2G630138397 | 5458251  | A        | G        | 1.10E-14  | 13.95939766  |
| BICF2P29801     | 5466995  | C        | G        | 3.77E-35  | 34.42331319  |
| BICF2S23244185  | 5471341  | A        | G        | 1.81E-07  | 6.742561433  |
| BICF2G630138405 | 5480346  | A        | G        | 1.46E-08  | 7.835349784  |
| BICF2G630138408 | 5492190  | C        | T        | 0.0001808 | 3.742801574  |
| BICF2P442907    | 5501761  | G        | T        | 1.39E-23  | 22.8569852   |
| BICF2G630138435 | 5525002  | T        | C        | 8.00E-08  | 7.0970186    |
| BICF2P981269    | 5541113  | C        | T        | 4.59E-37  | 36.33847126  |
| BICF2P1254298   | 5545082  | G        | A        | 4.31E-79  | 78.36542198  |

|                 |         |   |   |           |             |
|-----------------|---------|---|---|-----------|-------------|
| BICF2S2368146   | 5557298 | C | T | 7.30E-19  | 18.13643924 |
| BICF2P711220    | 5568947 | T | C | 0.1158    | 0.936291441 |
| BICF2S23655220  | 5580558 | C | T | 0.006047  | 2.218460031 |
| BICF2P1084655   | 5591240 | C | T | 0.0001292 | 3.888737486 |
| BICF2P1454069   | 5603613 | A | G | 4.43E-14  | 13.35398859 |
| BICF2P413442    | 5650118 | C | T | 0.0546    | 1.262807357 |
| BICF2P962829    | 5661580 | C | T | 9.15E-10  | 9.038626372 |
| BICF2P457635    | 5692701 | T | C | 6.83E-20  | 19.16589734 |
| BICF2S2439986   | 5713467 | C | G | 1.94E-05  | 4.711974465 |
| BICF2G630138453 | 5747820 | G | A | 9.70E-13  | 12.0133626  |
| BICF2G630138465 | 5757842 | G | A | 0.0005478 | 3.261377972 |
| BICF2P590169    | 5778762 | G | A | 1.22E-11  | 10.91435271 |
| BICF2G630138606 | 5821450 | T | G | 0.1898    | 0.721703792 |
| BICF2S23628012  | 5844312 | A | G | 0.02501   | 1.601886308 |
| BICF2G630138666 | 5876191 | T | C | 0.19      | 0.721246399 |
| BICF2P501052    | 5885754 | A | T | 4.06E-16  | 15.39179499 |
| BICF2G630138694 | 5906561 | C | T | 1.76E-09  | 8.755722879 |
| BICF2P708810    | 5917014 | G | A | 1.31E-09  | 8.881735274 |
| BICF2G630138732 | 5947669 | C | A | 1.98E-12  | 11.7044329  |
| BICF2G630138744 | 5959581 | G | C | 9.85E-07  | 6.006475597 |
| BICF2P651167    | 5969708 | G | A | 5.25E-12  | 11.28008894 |

Table S9: SNPs genotyped from sequencing within the region on CFA27 associated with curly fur. Shown are the positions of 200 SNPs discovered around the SNPLex homozygous region as well as their genotypes in curly and non-curly haired dogs. Orange highlights the homozygous major allele in cases, green is the homozygous minor allele in cases, white is heterozygous and gray indicates no data. Primers used to obtain the sequences from which the SNPs were discovered are listed in Table S4.

| Markers             | Position | Irish Water Spaniel<br>Irish Water Spaniel<br>Irish Water Spaniel<br>Irish Water Spaniel<br>Std. Poodle<br>Std. Poodle<br>Std. Poodle<br>Std. Poodle | Portuguese Water Dog<br>Portuguese Water Dog<br>Portuguese Water Dog<br>Portuguese Water Dog<br>Kuvasz<br>Kuvasz<br>Kuvasz<br>Kuvasz | Soft Coated Wheaten Terrier<br>Soft Coated Wheaten Terrier | Dachshund<br>Dachshund<br>Dachshund<br>Dachshund<br>Dachshund<br>Dachshund<br>Dachshund |
|---------------------|----------|------------------------------------------------------------------------------------------------------------------------------------------------------|--------------------------------------------------------------------------------------------------------------------------------------|------------------------------------------------------------|-----------------------------------------------------------------------------------------|
| Markers             | Position | Fixed curly breeds                                                                                                                                   | Non fixed curly breeds                                                                                                               |                                                            | Non curly breeds                                                                        |
| SQ7535 <sup>a</sup> | 5525002  | CC CC CC CC TT CC CC                                                                                                                                 | CT TT TT CT TT TT TT CT                                                                                                              |                                                            |                                                                                         |
| SQ7533              | 5526163  | CC CC TT CC CT TT CC CC                                                                                                                              | CT TT CT CT TT TT CT                                                                                                                 |                                                            |                                                                                         |
| SQ7533              | 5526414  | GG GG CC GG CG CC GG GG                                                                                                                              | CG CC CG CG CG CC CC CG                                                                                                              |                                                            |                                                                                         |
| SQ7533              | 5526435  | AA AA CC AA AC CC AA AA                                                                                                                              | AC CC AC AC AC CC CC AC                                                                                                              |                                                            |                                                                                         |
| SQ7532              | 5527752  | CT TT TT CT CT TT TT TT                                                                                                                              | TT TT CT TT CT TT TT TT                                                                                                              |                                                            |                                                                                         |
| SQ7532              | 5527827  | CC CC CC CC CT CC CC CC                                                                                                                              | CC CC CT CC CT CC CC CC                                                                                                              |                                                            |                                                                                         |
| SQ7594              | 5528122  | TT TT TT TT TT TT TT TT                                                                                                                              | TT TT TT TT TT TT TT TT                                                                                                              | TT TT CT TT TT TT                                          | TT                                                                                      |
| SQ7594              | 5528329  | GT GT TT GG TT GG GG                                                                                                                                 | TT TT TT TT TT TT TT GT                                                                                                              | TT GT TT TT                                                | TT                                                                                      |
| SQ7594              | 5528386  | AG GG AG AG GG GG GG                                                                                                                                 | GG GG AG GG AG GG GG GG                                                                                                              | AA AA AG AG GG AA AG                                       | GG                                                                                      |
| SQ7681              | 5528910  | CC CC CC AC CC CC CC                                                                                                                                 | AC CC CC AC CC AC CC CC CC                                                                                                           | CC CC CT CC CC CC CC                                       | AA                                                                                      |
| SQ7681              | 5528970  | TT TT TT TT TT TT TT TT                                                                                                                              | TT TT TT TT TT CT TT TT                                                                                                              | CT TT CT CT TT TT TT                                       | CC                                                                                      |
| SQ7681              | 5528975  | CT CC CC TT CC CC CC CC                                                                                                                              | CC CC CT CC CT CC CC CC                                                                                                              | CT TT CC CC CC CT CT                                       | CC CC CC                                                                                |
| SQ7596              | 5529246  | CC CC CC CC CC CC CC CC                                                                                                                              | CC CC CC CC CC CC CC CC                                                                                                              | CC CC TT TT CC CC CC                                       |                                                                                         |
| SQ7596              | 5529258  | AG GG GG AA GG GG GG GG                                                                                                                              | GG GG AG GG GG GG GG GG                                                                                                              | AG AA GG GG GG AG AG                                       |                                                                                         |
| SQ7597              | 5529449  | AA AA GG AA AA AA AA                                                                                                                                 | AA AA AA AA AA AA AA AA                                                                                                              | GG AA AA AA AA                                             | GG                                                                                      |
| SQ7597              | 5529524  | GG GG AG GG GG GG GG                                                                                                                                 | GG GG GG GG GG GG GG GG                                                                                                              | GG GG GG GG GG AG GG                                       | AA                                                                                      |
| SQ7683              | 5530270  | CC CC CC CC CC                                                                                                                                       | CC CT CC CC CC CT                                                                                                                    | CC CC CC TT CC CT                                          | CC                                                                                      |
| SQ7598              | 5530291  | TT TT TT TT TT TT                                                                                                                                    | TT TT TT CT TT TT                                                                                                                    | CC TT TT TT TT CC TT CT                                    | TT                                                                                      |
| SQ7598              | 5530558  | GG GG GG GG GG GG GG GG                                                                                                                              | GG GG CG GG CG GG GG                                                                                                                 | CG CG GG GG GG CG CC                                       | GG                                                                                      |
| SQ7598              | 5530624  | GG GG GG GG GG GG GG GG                                                                                                                              | GG GG AG GG AG GG GG GG                                                                                                              | GG GG GG AG AA GG GG                                       | GG                                                                                      |
| SQ7608              | 5531233  | AA AA AA AA AA AA AA                                                                                                                                 | AA AA AG AA AG AA AA AA                                                                                                              | AG AG AA AA AA AG GG                                       | AA                                                                                      |
| SQ7608              | 5531249  | CC CC CC CC CC CC CC                                                                                                                                 | CC CC CG CC CG CC CC CC                                                                                                              | CG CG CC CC CC CG GG                                       | CC                                                                                      |
| SQ7608              | 5531284  | AA AA AA AA AA AA AA                                                                                                                                 | AA AA AG AA AG AA AA AA                                                                                                              | AG AG AA AA AA AG GG                                       | AA                                                                                      |
| SQ7608              | 5531323  | TT TT TT TT TT TT TT                                                                                                                                 | TT TT CT TT CT TT TT TT                                                                                                              | CT CT TT TT TT CT CC                                       | TT                                                                                      |
| SQ7608              | 5531332  | GG GG GG GG GG GG GG GG                                                                                                                              | GG GG AG GG AG GG GG GG                                                                                                              | AG AG GG GG GG AG AA                                       | GG                                                                                      |
| SQ7608              | 5531393  | AA AA AA AA AA AA AA                                                                                                                                 | AA AA AG AA AG AA AA AA                                                                                                              | AG AG AA AA AA AG GG                                       | AA                                                                                      |
| SQ7608              | 5531468  | GG GG GG GG GG GG GG GG                                                                                                                              | GG GG AG GG AG GG GG GG                                                                                                              | AG AG GG GG GG AG AA                                       | GG                                                                                      |
| SQ7608              | 5531486  | GG AG GG AG GG GG GG                                                                                                                                 | AG GG AG AG AG GG GG GG                                                                                                              | AG AG GG GG GG AG AA                                       | AA                                                                                      |
| SQ7608              | 5531493  | AA AG AA AG AA AA AA                                                                                                                                 | AG AA AG AG AG AA AA AA                                                                                                              | AG AG AA AA AA AG GG                                       | GG                                                                                      |
| SQ7599              | 5532254  | CT                                                                                                                                                   | CT                                                                                                                                   | TT CT                                                      | TT                                                                                      |
| SQ7599              | 5532361  | CG GG GG                                                                                                                                             | CG GG CG CG CG GG                                                                                                                    | CG CG CC CG CC CC CC CC                                    | CC                                                                                      |
| SQ7599              | 5532481  | AG AG AA AA                                                                                                                                          | AG AA AG AG AG AG AG                                                                                                                 | AG GG AG GG GG GG GG                                       | GG                                                                                      |
| SQ7610              | 5532831  | GG AG GG AG AG GG GG                                                                                                                                 | GG AG AG AG AG GG AG                                                                                                                 | AA AG AA AA AA AA AA                                       | AA                                                                                      |
| SQ7610              | 5533022  | AA AG AA AG AG AA AA AA                                                                                                                              | AA AG AG AG AG AA AG                                                                                                                 | GG AG GG GG GG GG GG                                       | GG                                                                                      |
| SQ7610              | 5533027  | CC AC CC AC AC CC CC CC                                                                                                                              | CC AC AC AC AC CC AC                                                                                                                 | AA AC AA AA AA AA AA                                       | AA                                                                                      |
| SQ7610              | 5533029  | GG AG GG AG AG GG GG GG                                                                                                                              | GG AG AG AG AG GG AG                                                                                                                 | AA AG AA AA AA AA AA                                       | AA                                                                                      |
| SQ7610              | 5533034  | TT AT TT AT AT TT TT TT                                                                                                                              | TT AT AT AT AT TT AT                                                                                                                 | AA AT AA AA AA AA AA                                       | AA                                                                                      |





|                      |         |                      |                      |                         |                      |                      |    |    |
|----------------------|---------|----------------------|----------------------|-------------------------|----------------------|----------------------|----|----|
| SQ7603               | 5538318 | AA AA                | AA AA AA AA AA       | AA AA AC AA AC AC       | AA AC AC AC          | CC CC CC CC CC       |    | AA |
| SQ7604               | 5538446 | AA AA                | AA AA AA AA          | AA AT AA AT AT          | AA AT AT             | TT TT TT             | TT | AA |
| SQ7604               | 5538458 | CC CC                | CC CC CC CC          | CC CT CC CT CT          | CC CT CT             | TT TT TT             | TT | CC |
| SQ7604               | 5538503 | CC CC                | CC CC CC CC          | CC CT CC CT CT          | CC CT CT             | TT TT TT             | TT | CC |
| SQ7604               | 5538535 | TT TT                | TT TT TT TT          | TT CT TT CT CT          | TT CT CT             | CC CC CC             | CC | TT |
| SQ7604               | 5538552 | GGGG                 | GGGGGGGG             | GG AG GG AG AG          | GG AG AG             | AA AA AA             | AA | GG |
| SQ7605               | 5538629 | CC CT                | CT CC CC CC          | CT CC CC CT CC CC       | CC CC CT CC          | CC CC CC CC CC       |    | TT |
| SQ7605               | 5538632 | CC CC                | CC CC CC CC          | CC CC CT CC TT CT       | CC CT CT TT          | TT TT TT TT TT       |    | CC |
| SQ7605               | 5538802 | AA AG                | AG AA AA AA AA       | AA GG AG GGGG           | AA GG GGGG           | GGGGGGGGGG           |    | GG |
| SQ7605               | 5538854 | CC AC                | AC CC CC CC CC       | AC CC TT AA TT TT       | CC TT TT TT          | TT TT TT TT TT       |    | AA |
| SQ7605               | 5538955 | AA AG                | AG AA AA AA AA       | AA AA GG AG GGGG        | AA GG GGGG           | GGGGGGGGGG           |    | GG |
| SQ7605               | 5539154 | CT                   | CC CC                |                         | TT                   | TT TT TT TT TT       |    | TT |
| SQ7605               | 5539179 | AA                   | AT                   | TT TT                   | AA AA TT             | AA AA AA AA AA       |    | AA |
| SQ7605               | 5539180 | AG                   | AG                   | GGGG                    | AA AA GG             | AA AA AA AA AA       |    | AA |
| SQ7607               | 5539321 | TT TT TT             | TT                   | TT                      | TT CC CC TT CC CC CC | CC CC CC CC CC       |    | TT |
| SQ7607               | 5539335 | CC CC CC CC CC CC    | CC                   | CC CC AA CC AA AA       | CC AA AA AA          | AA AA AA AA AA       |    | CC |
| SQ7607               | 5539351 | AA AA AA AA AA AA    | AA                   | AA AA GG AA GGGG        | AA GG GGGG           | GGGGGGGGGG           |    | AA |
| SQ7607               | 5539369 | TT TT TT TT TT TT TT |                      | TT TT CC TT CC CC       | TT CC CC CC          | CC CC CC CC CC       |    | TT |
| SQ7607               | 5539381 | CC CC CC CC CC       |                      | CC CC TT CC TT TT       | CC TT TT TT          | TT TT TT TT TT       |    | CC |
| SQ7607               | 5539432 | AA AA AA AA AA AA AA | AA AA GG AA GGGG     | AA GG GG AG             | GGGGGGGGGG           |                      |    | AA |
| SQ7607               | 5539528 | AA AA AA AA AA AA AA | AA AA GG AA GGGG     | AA GG GG GG             | GGGGGGGGGG           |                      |    | AA |
| SQ7607               | 5539557 | AA AA AA AA AA AA AA | AA AA GG AA GGGG     | AA GG GG AG             | GGGGGGGGGG           |                      |    | AA |
| SQ7671               | 5539674 | GGGGGGGGGGGGGGGG     | GGGG                 | AA GG AG AA GG AA AA AA | AA AA AA AA AA AA AA | AA AA AA AA AA AA AA |    | GG |
| SQ7671               | 5539716 | GGGGGGGGGGGGGG       | GGGGGG               | AG GG AG GG             | AA                   | AA AA AA AA          |    | GG |
| SQ7671               | 5539744 | CC CC CC CC CC CC    | CC CC CC             | CT CC CT CC             | TT                   | TT TT TT TT TT       |    | CC |
| SQ7671               | 5539766 | CC CC CC CC CC CC    | CC CC CC             | CT CC CT CC             | TT                   | TT TT TT TT TT       |    | CC |
| SQ7671               | 5539867 | TT TT TT TT TT TT    | TT TT TT             | CT TT CT TT             | CC                   | CC CC CC CC CC       |    | TT |
| SQ7617               | 5539929 | GGGGGGGGGGGGGG       | GGGGGG               | AG GG AG AG GG AG       | AA AG                | AA AA AA AA AA AA AA |    | GG |
| SQ7617               | 5540058 | GGGGGGGGGGGGGG       | GGGGGG               | GT GT GT                | TT GT                | TT TT TT TT TT       |    | GG |
| SQ7616 <sup>e</sup>  | 5540581 | AA AA AA AA          | AA AA AA             | AA AA AG AA AG AG       | AA AG GG AG          | GGGGGGGGGGGGGG       |    | AA |
| SQ7672               | 5540749 | CC CC                | CC CC CC CC          | CC CC CC CC CC CC       | GG CG                | CC CG CC CC CC CC    |    | CC |
| SQ7523 <sup>c</sup>  | 5540756 | GGGG                 | GG GGGGGG            | GGGGGGGGGGGG            | AG AG                | GG AG GGGGGG GG      |    | GG |
| SQ7523 <sup>c</sup>  | 5540760 | GGGG                 | GG GGGGGG            | GGGGGGGGGGGG            | AG AG                | GG AG GGGGGG GG      |    | GG |
| SQ7519               | 5541774 | GGGG                 | GGGGGGGGGGGG         | GGGG                    | AG GG AG AG GG AG    |                      |    |    |
| SQ7518               | 5542234 | TT TT TT TT TT TT TT | TT TT                | CT TT CT CT TT          | CT                   |                      |    |    |
| SQ7673               | 5542564 | GGGGGGGGGGGGGGGG     | GGGG                 | AG GG AG AG GG AG       | AA AG AA             | AG AA AG AG AA       |    | AA |
| SQ7674 <sup>cd</sup> | 5542806 | TT TT TT TT TT TT TT | TT TT                | CT TT CT CT TT          | CT CC CT             | CC CC CC CC CC       |    | CC |
| SQ7674               | 5542949 | TT TT TT TT TT TT TT | TT                   | TT CT TT CT CT TT       | CT CC CT             | CC CC CT CC CC CT CT |    | CC |
| SQ7618               | 5543341 | CC CC CC CC CC CC CC | CC CC CC             | CC CC CC CC CC          | CC CC CC CC CC       | CC CC CC CC CC       |    | TT |
| SQ7619               | 5544071 | AA AA AA AA AA AA AA |                      | AA AG AG AA AG          | AG AG                | GG                   |    | GG |
| SQ7619               | 5544218 | CC CC CC CC CC CC CC |                      | CC CT CT CC CT          | CT CT                | TT                   |    | CC |
| SQ7619               | 5544228 | GGGGGGGGGGGGGGGG     |                      | GG AG AG GG AG          | AG AG                | AA                   |    | AA |
| SQ7620 <sup>b</sup>  | 5545082 | GGGGGGGGGGGGGGGG     | GGGG                 | AG AG AG AG             | AA AG AG AG          | AA                   |    | AA |
| SQ7511               | 5545917 | TT TT TT TT TT TT TT | TT TT                | GT TT GT GT TT          | GT                   |                      |    |    |
| SQ7675               | 5546570 | GG GGGGGG            | GGGGGGGGGG           | GGGGGGGGGG              | GGGGGGGGGG           | AG GG AG AG          |    | GG |
| SQ7677               | 5547619 | AA AA AA AA AA AA    | AA AA AA AA AA AA AA | AA AA AA AA AA AA       | AT AT                | AA AA AT AA          |    | TT |
| SQ7677               | 5547656 | GGGGGGGGGGGGGG       | GGGGGGGGGGGGGGGG     | GGGGGGGGGGGGGGGG        | AG AG                | GG GG AG GG          |    | AA |
| SQ7621               | 5548275 | GGGGGGGGGGGGGGGG     | GGGGGGGGGGGGGGGG     | GGGGGGGGGGGGGGGG        | AG AG                | AG AG GG AG GG       |    | GG |
| SQ7679               | 5548483 | GGGGGGGGGGGGGGGG     | GGGGGGGGGGGGGGGG     | GGGGGGGGGGGGGGGG        | AG AG                | GG GG AA             |    | AA |
| SQ7622               | 5548935 | TT TT TT TT TT TT TT | TT TT TT TT TT TT TT | TT TT TT TT TT TT TT    | GT GT                | GG GT GT TT          |    | GG |
| SQ7680               | 5549592 | CC CC CC CC CC       | CC CC CC CC CC       | CC CC CC CC CC          | CC                   | AC AC                |    | CC |
| SQ7623               | 5550017 | GGGGGGGGGGGGGGGG     | GGGGGGGGGGGGGGGG     | GGGGGGGGGGGGGGGG        | AG AG                | AG AG GG GG GG       |    | AA |
| SQ7623               | 5550079 | CC CC CC CC CC CC CC | CC CC CC CC CC CC CC | CC CC CC CC CC CC CC    | CG CG                | CC CC CC             |    | CC |
| SQ7623               | 5550101 | TT TT TT TT TT TT TT | TT TT TT TT TT TT TT | TT TT TT TT TT TT TT    | CT CT                | CC CC TT CT TT       |    | CC |
| SQ7623               | 5550113 | AA AA AA AA AA AA AA | AA AA AA AA AA AA AA | AA AA AA AA AA AA AA    | AG AG                | AA AA AA AA AA       |    | GG |
| SQ7623               | 5550140 | AA AA AA AA AA AA AA | AA AA AA AA AA AA AA | AA AA AA AA AA AA AA    | AA AA                | TT TT AA AT AA       |    | AA |
| SQ7623               | 5550158 | TT TT TT TT TT TT    | TT TT TT TT TT TT    | TT TT TT TT TT TT       | CT CT                | CC CC TT CT TT       |    | CC |

exon 1  
KRT-71

exon 2  
KRT-71

Homozygous region in fixed curly breeds

|                     |         |                                 |                         |                      |                      |          |       |
|---------------------|---------|---------------------------------|-------------------------|----------------------|----------------------|----------|-------|
| SQ7624              | 5550386 | GG GGGGGGGGGGGGGGGGGGG          | GG GGGGGGGGGGGGGGGGGGG  | AG AG                | GG GGGGG             |          | GG    |
| SQ7624              | 5550435 | TT TT TT TT TT TT TT TT         | TT TT TT TT TT TT TT TT | GGGG                 | TT TT TT             |          | TT    |
| SQ7627              | 5550607 | TT TT TT TT TT TT TT TT         | TT TT TT TT TT TT TT TT | CC CC                | TT TT TT             |          | TT    |
| SQ7627              | 5550724 | AA AA AA AA AA AA AA AA         | AA AA AA AA AA AG AA AA | AG AG                | GGGG AA AG AA        |          | GG    |
| SQ7627              | 5550756 | TT TT TT TT TT TT TT TT         | TT TT TT TT TT TT TT TT | AT AT                | TT AT                |          | TT    |
| SQ7625              | 5551174 | AA AA AA AA AA AA AA AA         | AA AA AA AA AA AA AA AA | GG                   | AA AG AA             |          | GG    |
| SQ7691              | 5552204 | TT TT TT TT TT TT TT TT         | TT TT AT TT AT AT AT    | TT                   | AA AT AA             | TT       | TT    |
| SQ7691              | 5552209 | GG GG GG GG GG GG GG GG         | GG GG GG GG GG GG GG GG | GG                   | GGGG GG              | AA       | AA    |
| SQ7691              | 5552237 | GG GG GG GG GG GG GG GG         | GG GG GG GG GG GG GG GG | AG                   | GG                   | AG GG GG | GG    |
| SQ7691              | 5552244 | AA AA AA AA AA AA AA AA         | AA AA AA AA AA AG       | AA                   | AA                   | AG AA AA | AA    |
| SQ7691              | 5552319 | TT TT TT TT TT TT TT TT         | TT TT TT TT TT CT       | CT                   | TT                   | CT CT CT | TT    |
| SQ7691              | 5552446 | AA AA AA AA AA                  | AA AA AT AA AT AA       | AA                   | AA                   | AA AA AA | AA    |
| SQ7689              | 5552791 | TT TT TT TT TT CC               | TT CC TT TT TT CC TT    | TT                   | TT                   | TT TT    | TT    |
| SQ7689              | 5552807 | GG GGGGGGGGGGGGGGGGGGG          | GG GGGGGGGGG GG GGGG    | TT                   | GG                   | TT GT    | TT    |
| SQ7689              | 5552808 | CC CC CC CC CC CC CC CC         | CC CC CC CC CC TT CC CC | TT                   | CC                   | TT CT    | TT    |
| SQ7689              | 5552819 | CC CC CC CC CC AA               | CC AA CC CC CC CC AA CC | CC                   | CC                   | CC CC    | CC    |
| SQ7689              | 5552853 | TT TT TT TT TT CC               | TT CC TT TT TT CC TT    | TT                   | TT                   | TT       | TT    |
| SQ7689              | 5552868 | GG GGGGGGGGGGGGGGGGGGG          | GG GGGGGGGGG GG GGGG    | GG                   | AG                   | AG       | GG    |
| SQ7689              | 5552888 | TT TT TT TT TT CC               | TT CC TT TT TT CC CC TT | CC                   | CT                   | CC       | CC    |
| SQ7689              | 5552896 | AA AA AA AA AA GG               | AA GG AA AA AA GG GG AA | GG                   | AG                   | GG       | GG    |
| SQ7689              | 5552998 | AA AA AA AA AA CC AA AA         | AA AA CC CC AA          | CC                   | CC                   | CC       | CC    |
| SQ7689              | 5553005 | T/T T/T T/T T/T T/T C/CT/T T/T  | T/T T/T T/T C/CT/T      | T/T                  | T/T                  | T/T      | T/T   |
| SQ7689              | 5553012 | TT TT TT TT TT CC TT TT         | TT TT CC CC TT          | CC                   | CT                   | CC       | CC    |
| SQ7690              | 5553026 | AA AA AA AA AA GG AA AA         | AA AA GG GG AA          | GG                   | AG                   | GG       | GG    |
| SQ7690              | 5553097 | GGGG GG GG AG GG GG             | GG GG AA GG GG AG AG    | AA                   | AG                   | AA AA    | AA    |
| SQ7690              | 5553102 | TT TT TT TT CC TT TT            | TT TT CC CC TT CT CT    | CC                   | CT                   | CC CC    | CC    |
| SQ7690              | 5553190 | CC CC CC CC CC CC CC            | CC TT CC CT CT          | TT                   | CC                   | CT CC    | TT    |
| SQ7690              | 5553249 | GGGG GG AG GG GG                | GGGG GG GG GG GG GG     | GG                   | AG                   | AG AG    | GG    |
| SQ7690              | 5553296 | GGGG GG GGGG                    | GGGG GG GG GG GG        | GG                   | GT                   | GT GT    | GG    |
| SQ7626              | 5553413 | GG GGGGGGGGGGGGGGGGGGG          | GGGGGGGGGGGGGGGGGGGG    | GGGGGGGGGGGGGGGGGGGG | GGGGGGGGGGGGGGGGGGGG | AA       | AA    |
| SQ7626              | 5553415 | CC CC CC CC CC CC CC CC         | CC CC CC CC CC CC CC CC | CC CC                | CT CC CC             | CT CT    | CC    |
| SQ7626              | 5553439 | GG GGGGGGGGGGGGGGGGGGG          | GG AA GG GG AG AG       | AA AA                | AG AG                | GG AA    | AG AA |
| SQ7626              | 5553445 | TT TT TT TT TT TT TT            | TT CC TT TT CT CT       | CC CC                | CT CT                | TT CC    | CT CC |
| SQ7626              | 5553461 | CC CC CC CC CC CC CC            | CC CC TT CC CC CC       | CC CC                | CC CC                | CC CC    | CC CC |
| SQ7626              | 5553590 | CC CC CC CC CC                  | CT TT CT CT CT          | CC CC                | CC CC                | CC CC    | CC CC |
| SQ7626              | 5553618 | GGGGGGGGGGGGGGGGGGGGGG          | AG AA AG AG AG GG GG GG | GGGGGGGGGGGGGGGGGGGG | GGGGGGGGGGGGGGGGGGGG | GG       | GG    |
| SQ7626              | 5553671 | GGGGGGGGGGGGGGGGGGGGGG          | GG GG GG GG GG GG GG GG | GGGGGGGGGGGGGGGGGGGG | GGGGGGGGGGGGGGGGGGGG | GG       | GG    |
| SQ7626              | 5553680 | CC CC CC CC CC CC CC            | CC CC CC CC CC CC CC    | CC CC                | CT CC CC             | CC       | CC    |
| SQ7626              | 5553695 | AA AA AA AA AA AA AA            | AA AA AA AA AA AA AA    | AA AA                | AA AA                | AG AA    | AA    |
| SQ7626              | 5553714 | CC CC CC CC CC CT TT            | CT CT CT CC CC          | CC CC                | CC CC                | CC CC    | CC    |
| SQ7626              | 5553786 | A/AA/AA/A A/A A/CG/CG A/C/CG/CG | A/CG/CG A/C/CG/CG       | A/CG/CG A/C/CG/CG    | A/CG/CG A/C/CG/CG    | A/A      | A/A   |
| SQ7500              | 5554883 | AA AA AA AA AA GG AA AA         | AG GG AG AA GG GG AA    |                      |                      |          |       |
| SQ7500              | 5554909 | TT TT TT TT TT CC TT TT         | CT CC CT TT CC CC CT    |                      |                      |          |       |
| SQ7500              | 5554933 | AA AA AA AA AA GG AA AA         | AG GG AG AA GG GG AA    |                      |                      |          |       |
| SQ7500              | 5554939 | TT TT TT TT TT CC TT            | CT CC CT TT CC CC TT    |                      |                      |          |       |
| SQ7500              | 5554945 | TT TT TT TT TT CC TT            | CT CC TT TT CC CC TT    |                      |                      |          |       |
| SQ7500              | 5554955 | GGGGGGGGGGGG AA GG              | AG AA AG AG AG AA AG    |                      |                      |          |       |
| SQ7500              | 5555200 | CC CC AA CC AA CC CC CC         | CC AC AA CC CC AA       |                      |                      |          |       |
| SNPlex <sup>a</sup> | 5557298 | 12 22 22 22 12 11 22 22         | 12 11 11 12 11 12 11 11 |                      |                      |          |       |

- SNPs that represent the boundaries of the homozygous regions in the SNPlex data.
- SNPs genotyped using the SNPlex system (Applied Biosystems).
- The type of these SNP correspond to a NON\_Synonymous\_coding
- SNP showing the strongest association based on this data and the sequencing of 661 additional dogs.
- Excluded SNP after sequencing on the 661 additional dogs.

Table S10. Combinations of genotypes create seven different coat phenotypes.

| PHENOTYPE              | <i>FGF5</i> | <i>RSP02</i> | <i>KRT71</i> |
|------------------------|-------------|--------------|--------------|
| Short                  | GG or GT    | 11           | CC or CT *   |
| Wire                   | GG or GT    | 22 or 12     | CC           |
| Wire and Curly         | GG or GT    | 22 or 12     | TT or CT     |
| Long                   | TT          | 11           | CC           |
| Long with Furnishings  | TT          | 22 or 12     | CC           |
| Curly                  | TT          | 11           | TT or CT     |
| Curly with Furnishings | TT          | 22 or 12     | TT or CT     |

\* The TT genotype was never found in this combination, even though it would likely also display a short phenotype.

### ***Supplemental References***

1. T. Maniatis, E. F. Fritsch, J. Sambrook, *Molecular cloning: A laboratory manual*. (Cold Spring Harbor Laboratory Press, N.Y., ed. 1st, 1982).
2. N. Rabbee, T. P. Speed, *Bioinformatics* **22**, 7 (2006).
3. S. Purcell *et al.*, *Am. J. Hum. Genet.* **81**, 559 (2007).
4. A. K. Wong, M. W. Neff, *Anim Genet*, (Mar 20, 2009).
5. M. W. Neff *et al.*, *Genetics* **151**, 803 (Feb, 1999).
6. K. Lange, D. Weeks, M. Boehnke, *Genet Epidemiol* **5**, 471 (1988).
7. American Kennel Club, *The Complete Dog Book*. (Howell Book House, New York, NY, ed. 19th Edition Revised, 1998).
8. K. Lindblad-Toh *et al.*, *Nature* **438**, 803 (Dec 8, 2005).
9. S. Rozen, H. Skaletsky, *Methods Mol Biol* **132**, 365 (2000).
10. B. Ewing, P. Green, *Genome Res* **8**, 186 (1998).
11. D. Gordon, C. Abajian, P. Green, *Genome Res* **8**, 195 (1998).
12. D. A. Nickerson, V. O. Tobe, S. L. Taylor, *Nucleic Acids Res* **25**, 2745 (1997).
13. M. Kawano *et al.*, *J Invest Dermatol* **124**, 877 (May, 2005).
14. L. J. Maccoux, D. N. Clements, F. Salway, P. J. Day, *BMC Mol Biol* **8**, 62 (2007).
15. S. H. Wood, D. N. Clements, N. A. McEwan, T. Nuttall, S. D. Carter, *Vet Immunol Immunopathol* **126**, 392 (Dec 15, 2008).
